# Supplementary material for: Silver-catalyzed nucleophilic substitution of aminals with ethyl diazoacetate: a new pathway to β-amino-α-diazoesters
Source: Royal Society of Chemistry journal article supplement (doi:10.1039/c6ob02136k), 2016-01-01

Supporting Information for:

## **Silver-Catalyzed Nucleophilic Substitution of Aminals with Ethyl Diazoacetate: A New Entry to $\beta$ -Amino- $\alpha$ -Diazoesters**

Jiawen Li,<sup>a,c</sup> Guiping Qin,<sup>a,c</sup> and Hanmin Huang<sup>\*a,b</sup>

<sup>a</sup>State Key Laboratory for Oxo Synthesis and Selective Oxidation, Lanzhou Institute of Chemical Physics, Chinese Academy of Sciences, Lanzhou 730000, P. R. China

<sup>b</sup>Department of Chemistry, University of Science and Technology of China, Hefei 230026, P. R. China

<sup>c</sup>University of Chinese Academy of Sciences, Beijing 100049, P. R. China

E-mail: hanmin@ustc.edu.cn

### **CONTENTS**

- 1 General experimental details and materials**
- 2 General procedure for the synthesis of  $\beta$ -amino- $\alpha$ -diazoesters**
- 3 Gram-scale reaction**
- 4 The graph for the thermogravimetric analysis of 3a**
- 5 The reactivity of 3a in the presence of AgBF<sub>4</sub>**
- 6 Experimental characterization data for products**
- 7 Copies for NMR of products**

## 1. General experiment details and materials

**Experimental:** All non-aqueous reactions and manipulations were used by standard Schlenk techniques. All solvents before used were dried and degassed by standard methods and stored under argon atmosphere. All reactions were monitored by TLC with silica gel-coated plates. NMR spectra were recorded on BRUKER Avance III (400 MHz) spectrometers. Chemical shifts were reported in parts per million (ppm) down field from TMS with the solvent resonance as the internal standard. Coupling constants (J) were reported in Hz and referred to apparent peak multiplications. High resolution mass spectra (HRMS) were recorded on Bruker MicroTOF-QII mass instrument(ESI). Aminals used here were known compounds and synthesized according to the reported methods.<sup>1</sup>

## 2. General procedure for the synthesis of $\beta$ -amino- $\alpha$ -diazoesters

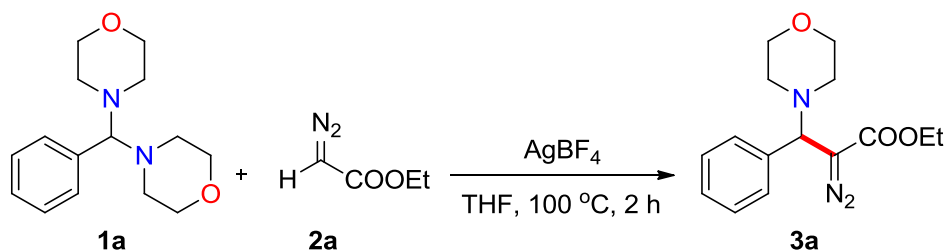

$\text{AgBF}_4$  (4.8 mg, 0.025 mmol) was added to a 25 mL flame-dried Young-type tube in the glove box. Then aminoral **1a** (0.5 mmol), THF (1.5 mL), diazo acetate **2a** (114.0 mg, 1.0 mmol) were added under argon atmosphere. The mixture was stirred at  $100\text{ }^\circ\text{C}$  for 2 hours. After cooling to room temperature, the solvent was removed under reduced pressure. The reaction mixture was purified by flash column chromatography on silica gel and eluted with EtOAc/hexane (1/30 – 1/10) to afford the desired product **3a**. The retention factor (Rf) data of **3a** is 0.35 (EtOAc/hexane = 1/20).

## 3. Gram-scale reaction

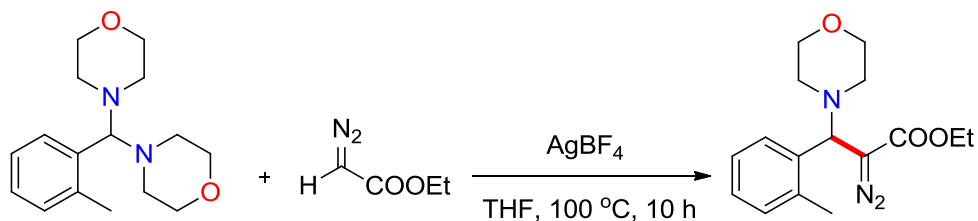

$\text{AgBF}_4$  (10.0 mg, 0.005 mmol) was added to a 100 mL flame-dried Schlenk flask in the glove box. Aminoral **1g** (1.38 g, 5.0 mmol), THF (10.0 mL), diazo acetate **2a** (1.14

g, 10.0 mmol) were added under argon atmosphere. The mixture was stirred at 100 °C for 10 hours. After cooling to room temperature, the solvent was removed under reduced pressure. The reaction mixture was purified by flash column chromatography on silica gel and eluted with EtOAc/hexane (1/30 – 1/10) to afford the desired product **3g** (751.0 mg, 50% yield).

#### 4. The graph for the thermogravimetric analysis of **3a**

To gain the stability parameters of  $\beta$ -amino- $\alpha$ -diazo compounds we obtained here, a thermogravimetric analysis of **3a** was conducted.

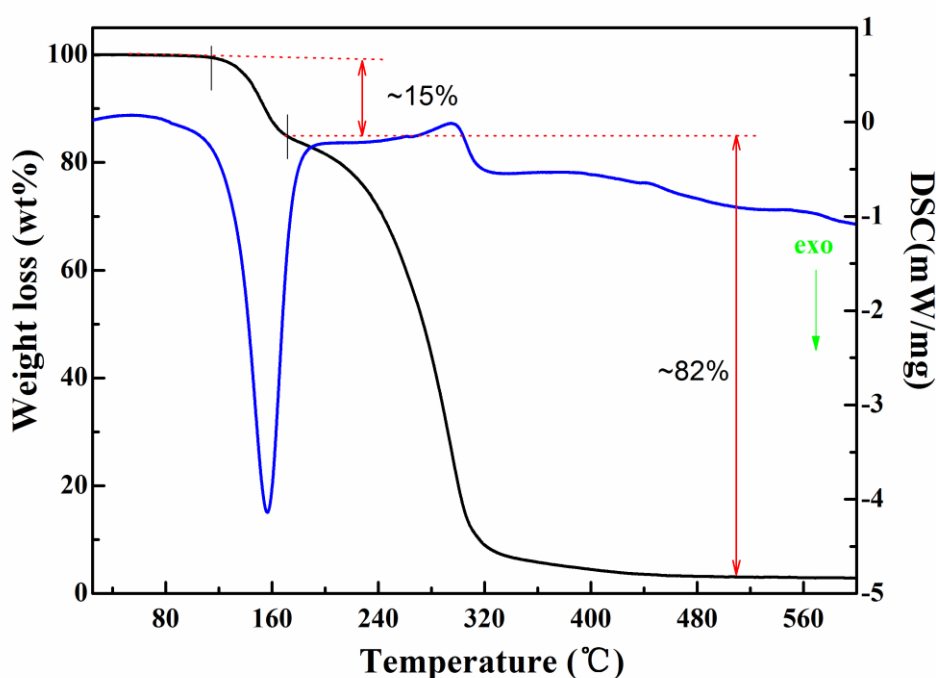

#### 5. The reactivity of **3a** in the presence of $\text{AgBF}_4$

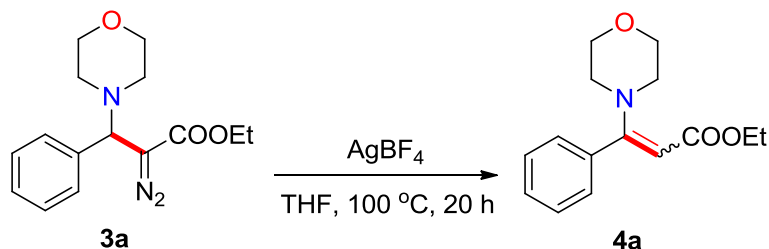

$\text{AgBF}_4$  (4.8 mg, 0.025 mmol) was added to a 25 mL flame-dried Young-type tube in the glove box. Then **3a** (144.5 mg, 0.5 mmol), THF (1.5 mL) were added under argon atmosphere. The mixture was stirred at 100 °C for 20 hours. After cooling to room temperature, the solvent was removed under reduced pressure. The reaction mixture was purified by flash column chromatography on silica gel and eluted with

EtOAc/hexane (1/30 – 1/5) to afford the desired product **4a** 67.6 mg (52.0% isolated yield).

## 6. Experimental characterization data for products

**ethyl 2-diazo-3-morpholino-3-phenylpropanoate (3a):** The title compound was

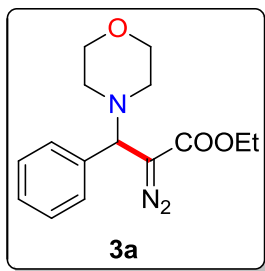

prepared according to the general procedure and purified by flash column chromatography on silica gel to give the yellow oil, 107 mg, 74 % yield.  $^1\text{H}$  NMR (400 MHz,  $\text{CDCl}_3$ )  $\delta$  1.28 (t,  $J = 6.8$  Hz, 3H), 2.44-2.55 (m, 4H), 3.67-3.76 (m, 4H), 4.25 (q,  $J = 7.2$  Hz, 2H), 4.31 (s, 1H), 7.28-7.36 (m, 5H);  $^{13}\text{C}$  NMR (100 MHz,  $\text{DMSO-d}_6$ )  $\delta$  14.2, 51.3, 60.7, 63.8, 66.1, 126.8, 127.9, 128.9, 138.4, 165.2; HRMS (ESI) calcd. for  $\text{C}_{15}\text{H}_{20}\text{N}_3\text{O}_3$   $[\text{M}+\text{H}]$ : 290.1499, found: 290.1495.

**ethyl 2-diazo-3-(dipropylamino)propanoate (3b):** The title compound was prepared

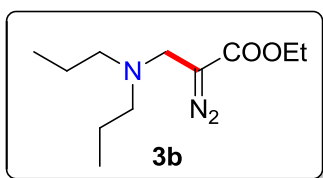

according to the general procedure and purified by flash column chromatography on silica gel to give the yellow oil, 97 mg, 85 % yield.  $^1\text{H}$  NMR (400 MHz,  $\text{CDCl}_3$ )  $\delta$  0.89 (t,  $J = 7.2$  Hz, 6H), 1.30 (t,  $J = 7.2$  Hz, 3H), 1.42-1.51 (m, 4H), 2.43 (t,  $J = 7.2$  Hz, 4H), 3.53 (s, 2H), 4.25 (q,  $J = 6.8$  Hz, 2H);  $^{13}\text{C}$  NMR (100 MHz,  $\text{CO}(\text{CD}_3)_2$ )  $\delta$  12.2, 14.9, 21.2, 48.8, 56.0, 61.2, 167.2; HRMS (ESI) calcd. for  $\text{C}_{11}\text{H}_{22}\text{N}_3\text{O}_2$   $[\text{M}+\text{H}]$ : 228.1707, found: 228.1700.

**ethyl 2-diazo-3-(pyrrolidin-1-yl)propanoate (3c):** The title compound was prepared

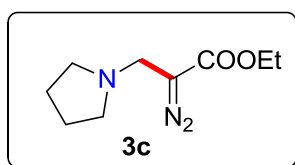

according to the general procedure and purified by flash column chromatography on silica gel to give the yellow oil, 79 mg, 81 % yield.  $^1\text{H}$  NMR (400 MHz,  $\text{CDCl}_3$ )  $\delta$  1.30 (t,  $J = 7.2$  Hz, 3H), 1.8 (s, 4H), 2.57 (s, 4H), 3.52 (s, 2H), 4.26 (q,  $J = 7.2$  Hz, 2H);  $^{13}\text{C}$  NMR (100 MHz,  $\text{CDCl}_3$ )  $\delta$  14.4, 23.5, 49.0, 52.9, 60.7, 166.8; HRMS (ESI) calcd. for  $\text{C}_9\text{H}_{16}\text{N}_3\text{O}_2$   $[\text{M}+\text{H}]$ : 198.1237, found: 198.1234.

**ethyl 2-diazo-3-phenyl-3-(pyrrolidin-1-yl)propanoate (3d):** The title compound was

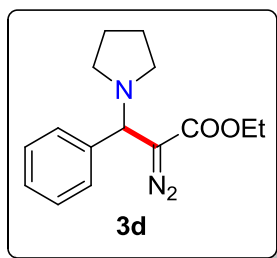

prepared according to the general procedure and purified by

flash column chromatography on silica gel to give the yellow oil, 105 mg, 77 % yield.  $^1\text{H}$  NMR (400 MHz,  $\text{CDCl}_3$ )  $\delta$  1.27 (t,  $J = 7.2$  Hz, 3H), 1.78-1.81 (m, 4H), 2.50-2.59 (m, 4H), 4.17-4.23 (m, 3H), 7.26-7.38 (m, 5H);  $^{13}\text{C}$  NMR (100 MHz,  $\text{CO}(\text{CD}_3)_2$ )  $\delta$  14.8, 24.3, 53.3, 61.4, 64.2, 127.6, 128.7, 129.6, 142.1, 166.0; HRMS (ESI) calcd. for  $\text{C}_{15}\text{H}_{20}\text{N}_3\text{O}_2$   $[\text{M}+\text{H}]$ : 274.1550, found: 274.1547.

**ethyl 2-diazo-3-phenyl-3-(piperidin-1-yl)propanoate (3e):** The title compound was

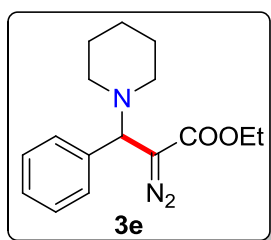

prepared according to the general procedure and purified by flash column chromatography on silica gel to give the yellow oil, 100 mg, 70 % yield.  $^1\text{H}$  NMR (400 MHz,  $\text{CDCl}_3$ )  $\delta$  1.28 (t,  $J = 6.8$  Hz, 3H), 1.44-1.48 (m, 2H), 1.53-1.61 (m, 4H), 2.40-2.50 (m, 4H), 4.25 (q,  $J = 6.8$  Hz, 2H), 4.40 (s, 1H), 7.25-7.29 (m, 1H), 7.33-7.39 (m, 4H);  $^{13}\text{C}$  NMR (100 MHz,  $\text{DMSO}-d_6$ )  $\delta$  14.2, 24.0, 25.6, 51.5, 60.7, 64.0, 126.7, 127.6, 128.8, 138.9, 165.5; HRMS (ESI) calcd. for  $\text{C}_{16}\text{H}_{22}\text{N}_3\text{O}_2$   $[\text{M}+\text{H}]$ : 288.1707, found: 288.1701.

**ethyl 2-diazo-3-(dimethylamino)-3-phenylpropanoate (3f):** The title compound was

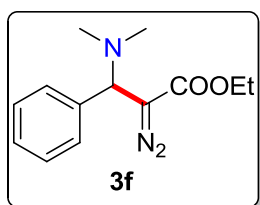

prepared according to the general procedure and purified by flash column chromatography on silica gel to give the yellow oil, 91 mg, 74 % yield.  $^1\text{H}$  NMR (400 MHz,  $\text{DMSO}-d_6$ )  $\delta$  1.21 (t,  $J = 7.2$  Hz, 3H), 2.19 (s, 6H), 4.14-4.19 (m, 3H), 7.31-7.34 (m, 3H), 7.38-7.42 (m, 2H);  $^{13}\text{C}$  NMR (100 MHz,  $\text{DMSO}-d_6$ )  $\delta$  14.2, 43.0, 60.7, 64.7, 126.6, 127.8, 128.9, 139.5, 165.3; HRMS (ESI) calcd. for  $\text{C}_{13}\text{H}_{18}\text{N}_3\text{O}_2$   $[\text{M}+\text{H}]$ : 248.1394, found: 248.1389.

**ethyl 2-diazo-3-morpholino-3-(o-tolyl)propanoate (3g):** The title compound was

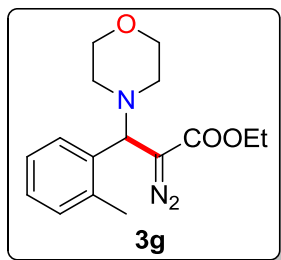

prepared according to the general procedure and purified by flash column chromatography on silica gel to give a yellow solid, 132 mg, 87 % yield.  $^1\text{H}$  NMR (400 MHz,  $\text{CDCl}_3$ )  $\delta$  1.28

(t,  $J = 6.8$  Hz, 3H), 2.35 (s, 3H), 2.46-2.52 (m, 4H), 3.66-3.76 (m, 4H), 4.25 (q,  $J = 6.8$  Hz, 2H), 4.46 (s, 1H), 7.16-7.22 (m, 3H), 7.41-7.44 (m, 1H);  $^{13}\text{C}$  NMR (100 MHz,  $\text{CDCl}_3$ )  $\delta$  14.5, 19.5, 51.8, 60.3, 60.9, 67.0, 126.2, 126.3, 127.4, 131.0, 136.2, 136.8, 166.4; HRMS (ESI) calcd. for  $\text{C}_{16}\text{H}_{22}\text{N}_3\text{O}_3$   $[\text{M}+\text{H}]$ : 304.1656, found: 304.1657.

**ethyl 2-diazo-3-morpholino-3-(m-tolyl)propanoate (3h):** The title compound was

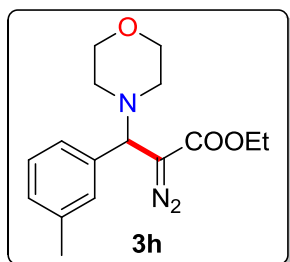

prepared according to the general procedure and purified by flash column chromatography on silica gel to give the yellow oil, 119 mg, 79 % yield.  $^1\text{H}$  NMR (400 MHz,  $\text{CDCl}_3$ )  $\delta$  1.28 (t,  $J = 7.2$  Hz, 3H), 2.35 (s, 3H), 2.43-2.53 (m, 4H), 3.67-3.76 (m, 4H), 4.19-4.25 (m, 3H), 7.09-7.11 (m, 1H), 7.15-7.16 (m,

2H), 7.22-7.25 (m, 1H);  $^{13}\text{C}$  NMR (100 MHz,  $\text{CDCl}_3$ )  $\delta$  14.5, 21.5, 51.7, 60.9, 64.5, 67.0, 124.1, 127.8, 128.7, 128.8, 138.6, 138.7, 166.3; HRMS (ESI) calcd. for  $\text{C}_{16}\text{H}_{22}\text{N}_3\text{O}_3$   $[\text{M}+\text{H}]$ : 304.1656, found: 304.1655.

**ethyl 2-diazo-3-morpholino-3-(p-tolyl)propanoate (3i):** The title compound was

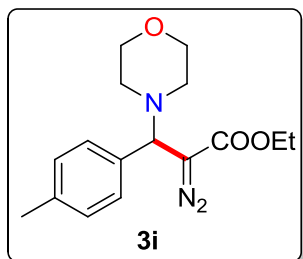

prepared according to the general procedure and purified by flash column chromatography on silica gel to give the yellow oil, 123 mg, 82 % yield.  $^1\text{H}$  NMR (400 MHz,  $\text{CDCl}_3$ )  $\delta$  1.28 (t,  $J = 7.2$  Hz, 3H), 2.34 (s, 3H), 2.43-2.53 (m, 4H), 3.66-3.75 (m, 4H), 4.24 (q,  $J = 7.2$  Hz, 2H), 4.28 (s, 1H),

7.17 (d,  $J = 8.0$  Hz, 2H), 7.25 (d,  $J = 8.0$  Hz, 2H);  $^{13}\text{C}$  NMR (100 MHz,  $\text{CDCl}_3$ )  $\delta$  14.5, 21.1, 51.7, 60.9, 64.3, 67.0, 127.0, 129.6, 135.7, 137.7, 166.4; HRMS (ESI) calcd. for  $\text{C}_{16}\text{H}_{22}\text{N}_3\text{O}_3$   $[\text{M}+\text{H}]$ : 304.1656, found: 304.1654.

**ethyl 3-(2-chlorophenyl)-2-diazo-3-morpholinopropanoate (3j):** The title compound

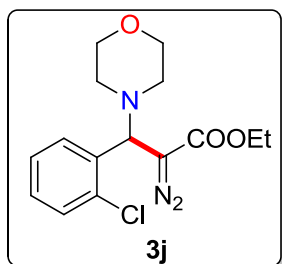

was prepared according to the general procedure and purified by flash column chromatography on silica gel to give a yellow solid, 75 mg, 46 % yield.  $^1\text{H}$  NMR (400 MHz,  $\text{CDCl}_3$ )  $\delta$  1.29

(t,  $J = 7.2$  Hz, 3H), 2.47-2.59 (m, 4H), 3.67-3.76 (m, 4H), 4.27 (q,  $J = 7.2$  Hz, 2H), 4.78 (s, 1H), 7.21-7.31 (m, 2H), 7.39-7.41 (m, 1H), 7.51-7.54 (m, 1H);  $^{13}\text{C}$  NMR (100 MHz,  $\text{CDCl}_3$ )  $\delta$  14.4, 51.6, 60.8, 61.0, 67.0, 127.0, 128.2, 128.8, 130.2, 133.9, 136.0, 165.9; HRMS (ESI) calcd. for  $\text{C}_{15}\text{H}_{18}\text{ClN}_3\text{NaO}_3$   $[\text{M}+\text{Na}]$ : 346.0929, found: 346.0939.

**ethyl 3-(3-chlorophenyl)-2-diazo-3-morpholinopropanoate (3k):** The title

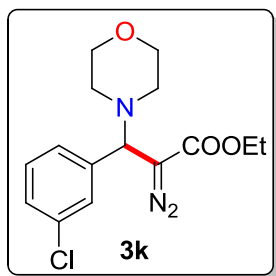

compound was prepared according to the general procedure and purified by flash column chromatography on silica gel to give the yellow oil, 94 mg, 58 % yield.  $^1\text{H}$  NMR (400 MHz,  $\text{CDCl}_3$ )  $\delta$  1.29 (t,  $J = 7.2$  Hz, 3H), 2.44-2.55 (m, 4H), 3.68-3.77 (m, 4H), 4.26 (q,  $J = 6.8$  Hz, 2H), 4.31 (s, 1H), 7.24-7.32 (m, 3H), 7.37 (s, 1H);  $^{13}\text{C}$  NMR (100 MHz,  $\text{CDCl}_3$ )  $\delta$  14.4, 51.6, 61.1, 64.0, 66.9, 125.3, 127.2, 128.2, 130.3, 134.9, 140.8, 166.1; HRMS (ESI) calcd. for  $\text{C}_{15}\text{H}_{18}\text{ClN}_3\text{NaO}_3$   $[\text{M}+\text{Na}]$ : 346.0929, found: 346.0937.

**ethyl 3-(4-chlorophenyl)-2-diazo-3-morpholinopropanoate (3l):** The title compound

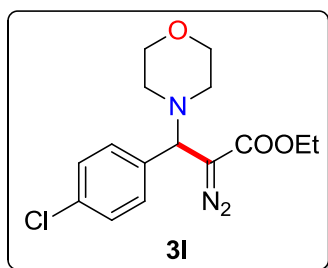

was prepared according to the general procedure and purified by flash column chromatography on silica gel to give the yellow oil, 99 mg, 62 % yield.  $^1\text{H}$  NMR (400 MHz,  $\text{CDCl}_3$ )  $\delta$  1.29 (t,  $J = 7.2$  Hz, 3H), 2.43-2.54 (m, 4H), 3.67-3.76 (m, 4H), 4.25 (q,  $J = 7.2$  Hz, 2H), 4.32 (s, 1H), 7.30-7.35 (m, 4H);  $^{13}\text{C}$  NMR (100 MHz,  $\text{CDCl}_3$ )  $\delta$  14.4, 51.6, 61.1, 63.9, 66.9, 128.5, 129.2, 133.7, 137.2, 166.1; HRMS (ESI) calcd. for  $\text{C}_{15}\text{H}_{18}\text{ClN}_3\text{NaO}_3$   $[\text{M}+\text{Na}]$ : 346.0929, found: 346.0934.

**ethyl 2-diazo-3-morpholino-3-(naphthalen-1-yl)propanoate (3m):** The title

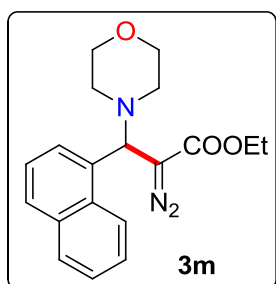

compound was prepared according to the general procedure and purified by flash column chromatography on silica gel to give the yellow oil, 131 mg, 77 % yield.  $^1\text{H}$  NMR (400 MHz,



CDCl<sub>3</sub>)  $\delta$  1.25 (m, 3H), 2.62 (m, 4H), 3.70-3.81 (m, 4H), 4.22-4.26 (m, 2H), 5.05 (s, 1H), 7.45-7.56 (m, 3H), 7.69-7.71 (m, 1H), 7.78-7.80 (m, 1H), 7.86-7.89 (m, 1H), 8.21-8.23 (m, 1H); <sup>13</sup>C NMR (100 MHz, CDCl<sub>3</sub>)  $\delta$  14.5, 52.0, 60.7, 61.0, 67.1, 123.1, 124.4, 125.3, 125.9, 126.5, 128.4, 128.9, 131.3, 133.9, 134.2, 166.2; HRMS (ESI) calcd. for C<sub>19</sub>H<sub>22</sub>N<sub>3</sub>O<sub>3</sub> [M+H]: 340.1656, found: 340.1640.

**ethyl 2-diazo-3-morpholino-3-(naphthalen-2-yl)propanoate (3n):** The title

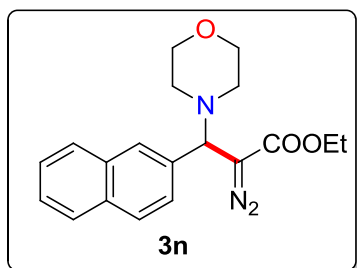

compound was prepared according to the general procedure and purified by flash column chromatography on silica gel to give the yellow oil, 140 mg, 82 % yield.

<sup>1</sup>H NMR (400 MHz, CDCl<sub>3</sub>)  $\delta$  1.28 (t, *J* = 7.2 Hz, 3H), 2.48-2.60 (m, 4H), 3.69-3.79 (m, 4H), 4.19-4.25 (m, 2H), 4.47 (s, 1H), 7.44-7.51 (m, 3H), 7.81-7.85 (m, 4H); <sup>13</sup>C NMR (100 MHz, CDCl<sub>3</sub>)  $\delta$  14.5, 51.9, 61.0, 64.7, 67.1, 124.7, 126.2, 126.3, 126.4, 127.7, 128.0, 128.9, 133.2, 133.4, 136.3, 166.3; HRMS (ESI) calcd. for C<sub>19</sub>H<sub>22</sub>N<sub>3</sub>O<sub>3</sub> [M+H]: 340.1656, found: 340.1663.

**ethyl 2-diazo-3-(furan-2-yl)-3-morpholinopropanoate (3o):** The title compound was

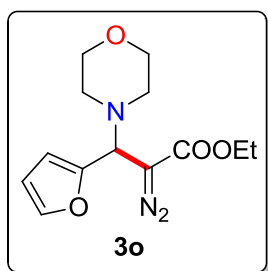

prepared according to the general procedure and purified by flash column chromatography on silica gel to give the yellow oil, 56 mg, 40 % yield. <sup>1</sup>H NMR (400 MHz, CDCl<sub>3</sub>)  $\delta$  1.30 (t, *J* = 6.8 Hz, 3H), 2.38-2.44 (m, 2H), 2.57-2.62 (m, 2H), 3.67-3.76 (m, 4H), 4.26 (q, *J* = 7.2 Hz, 2H), 4.49 (s, 1H), 6.30-6.35 (m,

2H), 7.40 (d, *J* = 0.8 Hz, 1H); <sup>13</sup>C NMR (100 MHz, CDCl<sub>3</sub>)  $\delta$  14.5, 51.0, 58.6, 61.1, 66.9, 108.6, 110.2, 142.6, 151.0, 166.3; HRMS (ESI) calcd. for C<sub>13</sub>H<sub>17</sub>N<sub>3</sub>NaO<sub>4</sub> [M+Na]: 302.1111, found: 302.1096.

**ethyl 2-diazo-3-morpholino-3-(pyridin-4-yl)propanoate (3p):** The title compound

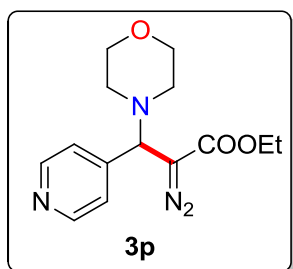

was prepared according to the general procedure and purified

by flash column chromatography on silica gel to give the yellow oil, 20 mg, 13 % yield.  $^1\text{H}$  NMR (400 MHz,  $\text{CDCl}_3$ )  $\delta$  1.30 (t,  $J = 7.2$  Hz, 3H), 2.44-2.60 (m, 4H), 3.69-3.78 (m, 4H), 4.27 (q,  $J = 6.8$  Hz, 2H), 4.39 (s, 1H), 7.32 (d,  $J = 6.0$  Hz, 2H), 8.62 (d,  $J = 5.6$  Hz, 2H);  $^{13}\text{C}$  NMR (100 MHz,  $\text{CDCl}_3$ )  $\delta$  14.4, 51.3, 61.3, 63.6, 66.9, 122.2, 147.5, 150.6, 165.9; HRMS (ESI) calcd. for  $\text{C}_{14}\text{H}_{19}\text{N}_4\text{O}_3$   $[\text{M}+\text{H}]$ : 291.1452, found: 291.1463.

**ethyl 2-diazo-3-(dibenzylamino)-3-phenylpropanoate (3q):** The title compound was

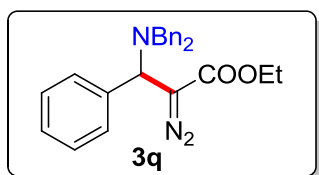

prepared according to the general procedure and purified by flash column chromatography on silica gel to give the yellow oil, 156 mg, 78 % yield.  $^1\text{H}$  NMR (400 MHz,  $\text{CDCl}_3$ )  $\delta$  1.26 (t,  $J = 6.8$  Hz, 3H), 3.64-3.73 (m, 4H), 4.15-4.29 (m, 2H), 4.92 (s, 1H), 7.19-7.32 (m, 7H), 7.37-7.41 (m, 6H), 7.57 (d,  $J = 7.6$  Hz, 2H);  $^{13}\text{C}$  NMR (100 MHz,  $\text{CDCl}_3$ )  $\delta$  14.5, 55.0, 58.7, 60.9, 61.0, 127.0, 127.3, 127.7, 128.3, 128.5, 129.0, 139.1, 139.3, 166.9; HRMS (ESI) calcd. for  $\text{C}_{25}\text{H}_{26}\text{N}_3\text{O}_2$   $[\text{M}+\text{H}]$ : 400.2020, found: 400.2001.

**ethyl 3-morpholino-3-phenylacrylate (4a):**  $^1\text{H}$  NMR (400 MHz,  $\text{CDCl}_3$ )  $\delta$  1.08 (t,  $J =$

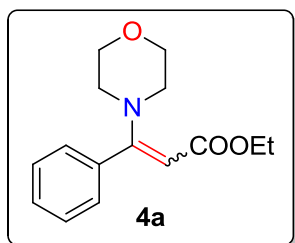

6.8 Hz, 3H), 3.06 (t,  $J = 4.8$  Hz, 4H), 3.69 (t,  $J = 4.8$  Hz, 4H), 3.94 (q,  $J = 7.2$  Hz, 2H), 4.97 (s, 1H), 7.24-7.26 (m, 2H), 7.39-7.40 (m, 3H);  $^{13}\text{C}$  NMR (100 MHz,  $\text{CDCl}_3$ )  $\delta$  14.3, 48.1, 58.8, 66.5, 90.8, 128.3, 128.7, 128.9, 136.0, 163.5, 167.8; HRMS (ESI) calcd. for  $\text{C}_{15}\text{H}_{19}\text{NO}_3\text{Na}$   $[\text{M}+\text{Na}]$ : 284.1257, found: 284.1265.

## References:

1. (a) H. Heaney, G. Papageorgiou, R. F. Wilkins, *Tetrahedron*, 1997, **53**, 2941; (b) T. Rosenau, A. Potthast, P. Kosma, *Tetrahedron*, 2004, **60**, 301; (c) M. Terada.; K. Machioka, K. Sorimachi, *Angew. Chem.*, 2009, **121**, 2591. (d) W. Zhao, L. Huang, Y. Guan and W. D. Wulff, *Angew. Chem., Int. Ed.*, 2014, **53**, 3436. (e) B. Hatano, K. Nagahashi and T. Kijima, *J. Org. Chem.*, 2008, **73**, 9188. (f) D. Mohammad Karimi, S. Mohammad Reza, Phosphorus, Sulfur and Silicon and the Related

Elements, 2004, 179, 89. (g) R. A. Henry, W. M. Dehn, J. Am. Chem. Soc., 1949, **71**, 2271. (h) M. F. Sansone, T. Koyanagi, D. E. Przybyla, R. W. Nagorski, Tetrahedron Lett., 2010, **51**, 6031. (i) S. Ryo, M. Hiroo, S. Kiyotomo, Synthesis, 1993, 705.

**7. Copies for  $^1\text{H}$  NMR and  $^{13}\text{C}$  NMR of products**

LJW-X15Y09-1-HNMR

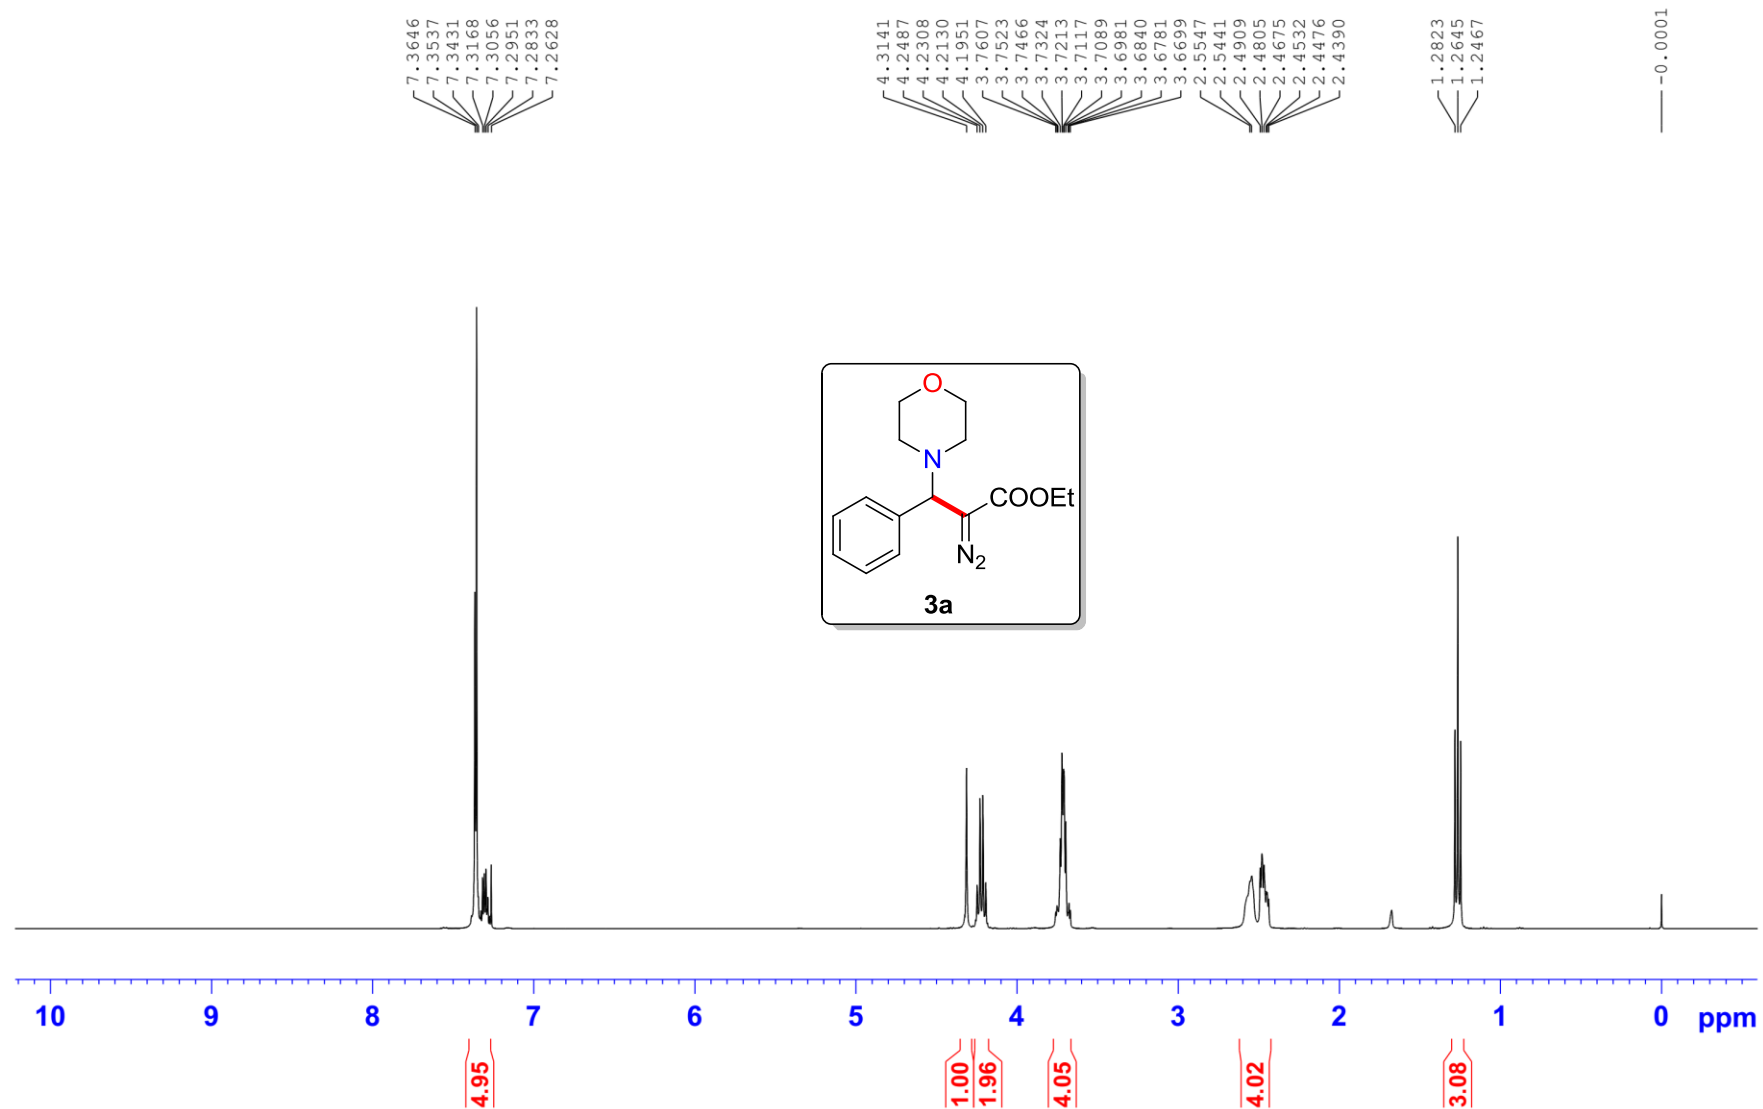

LJW-X15Z16-6-CNMR DMSO-d6

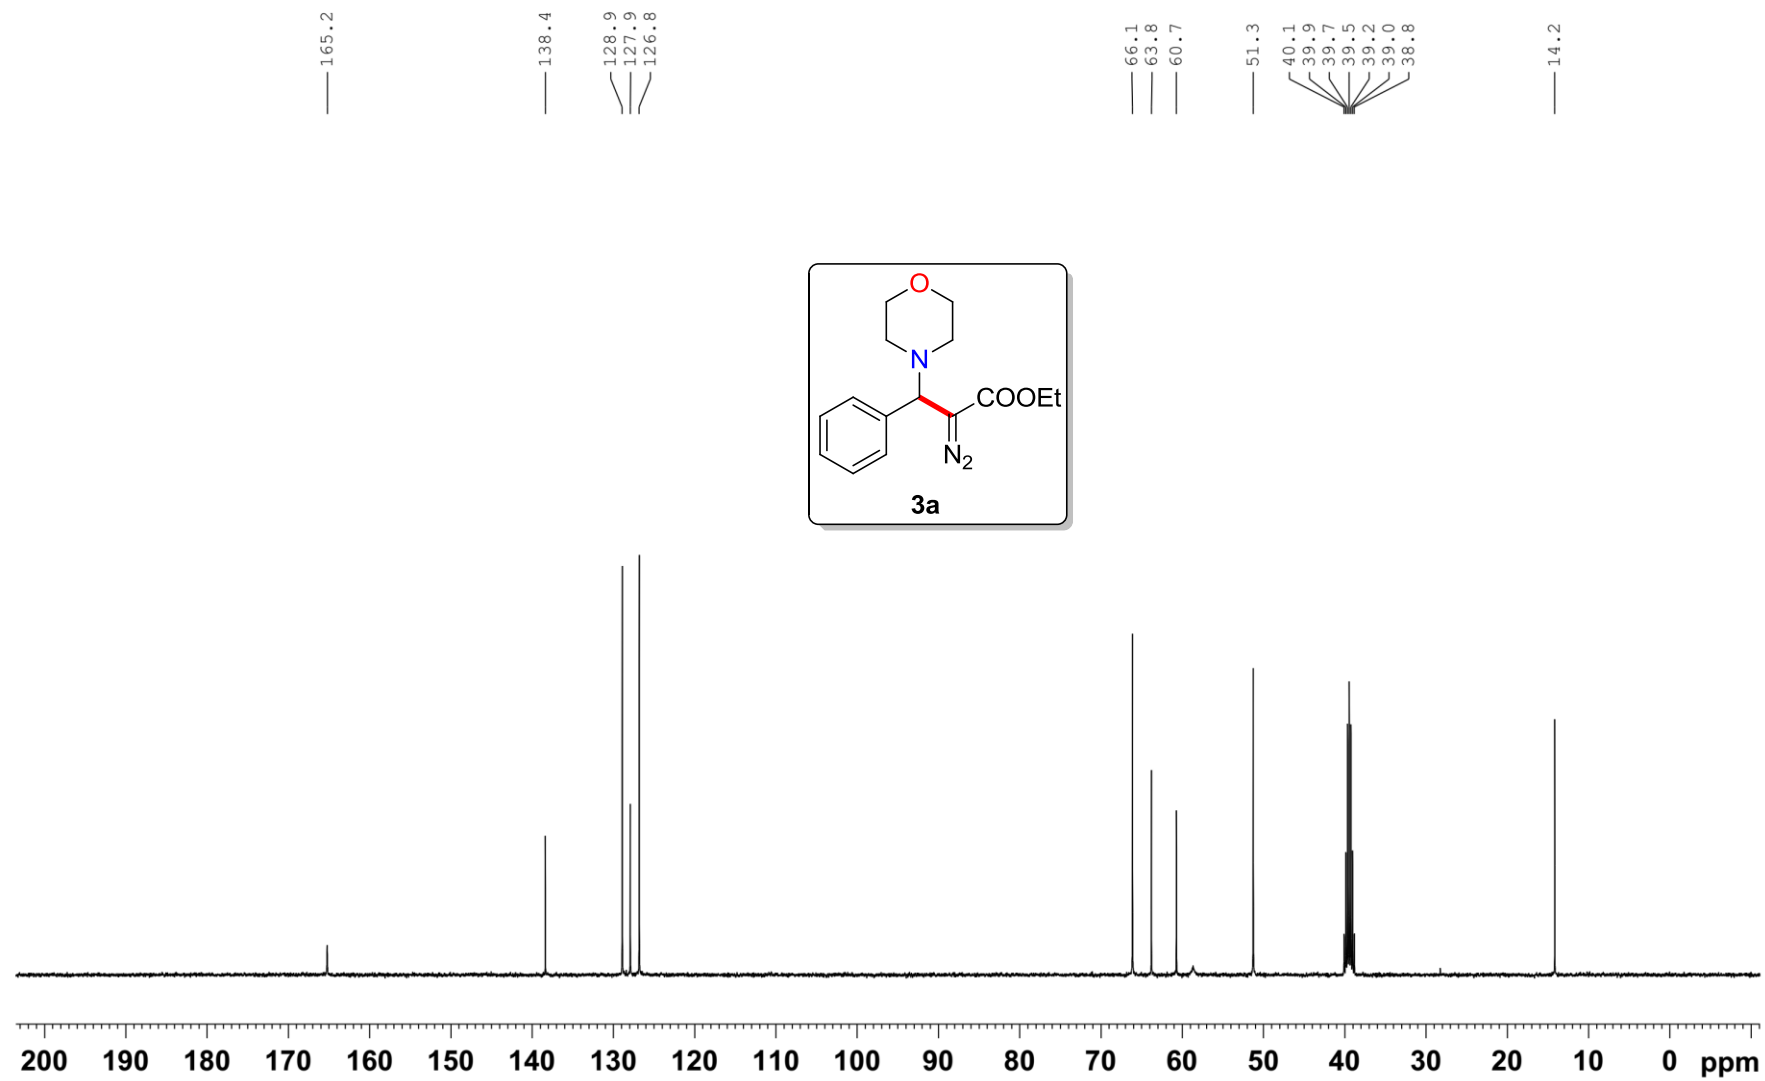

LJW-X15Y26-2-HNMR CDC13

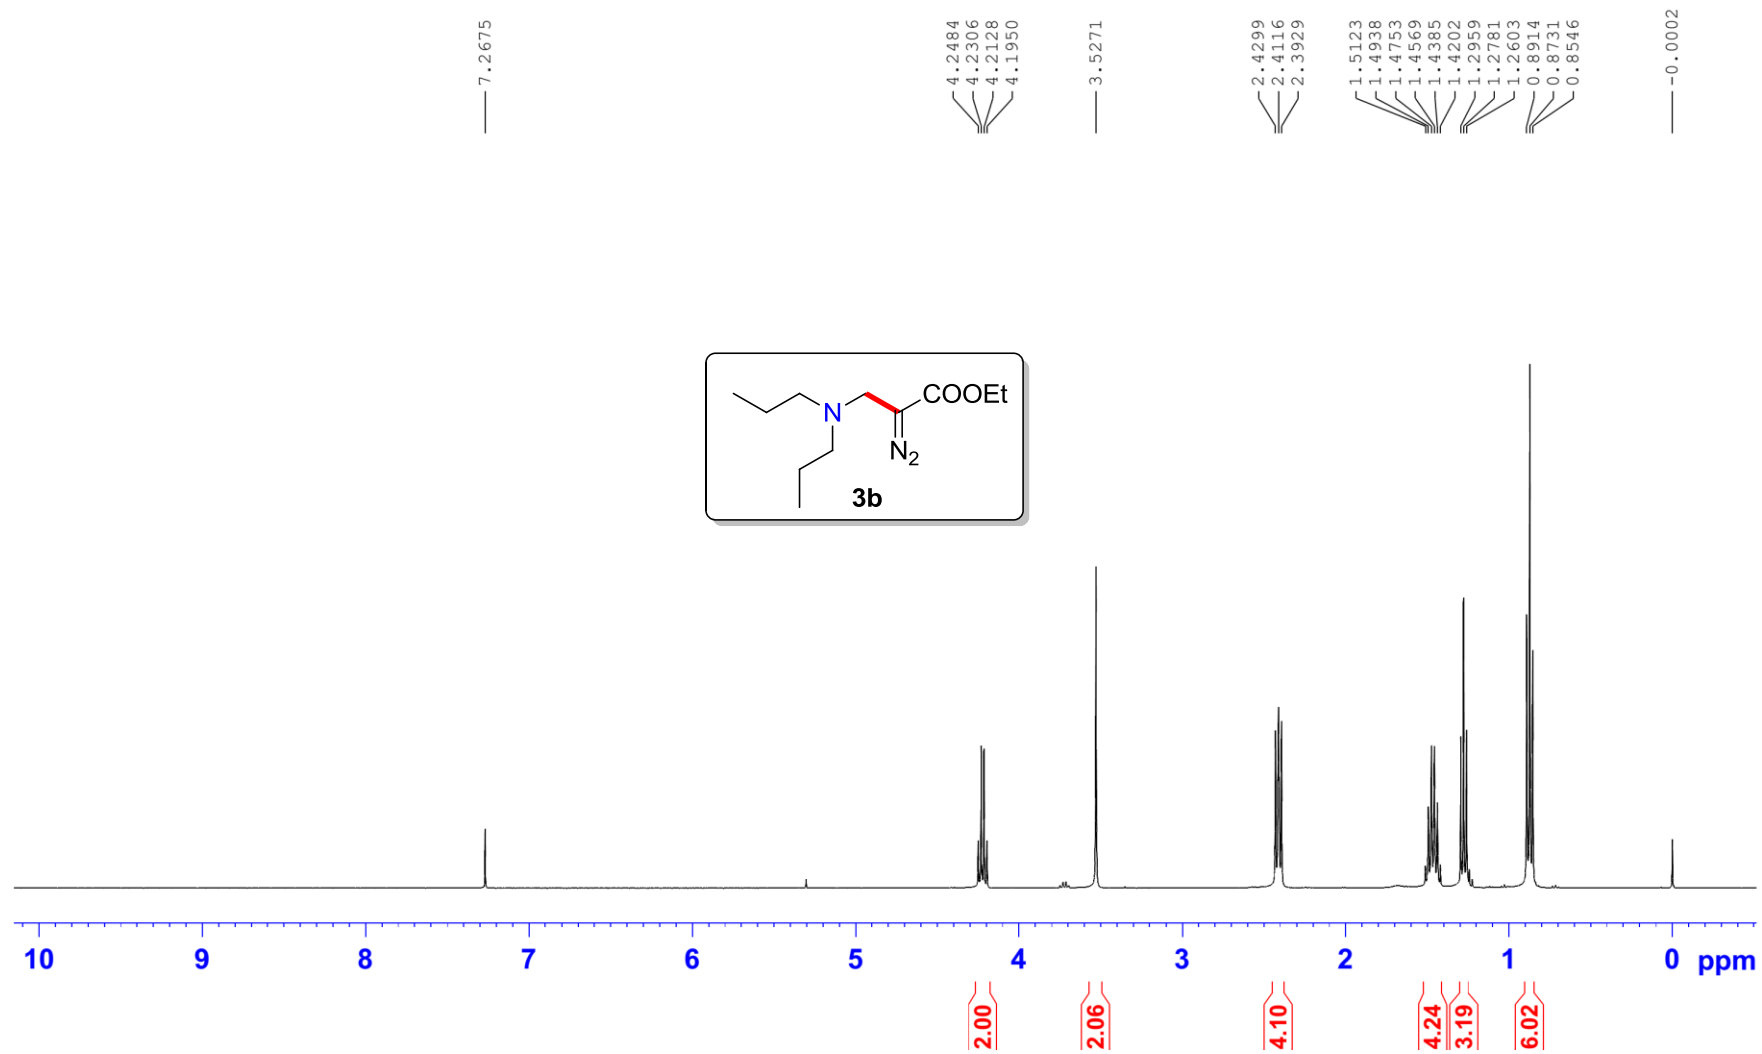

LJW-X15Z23-1-CNMR acetone-d6

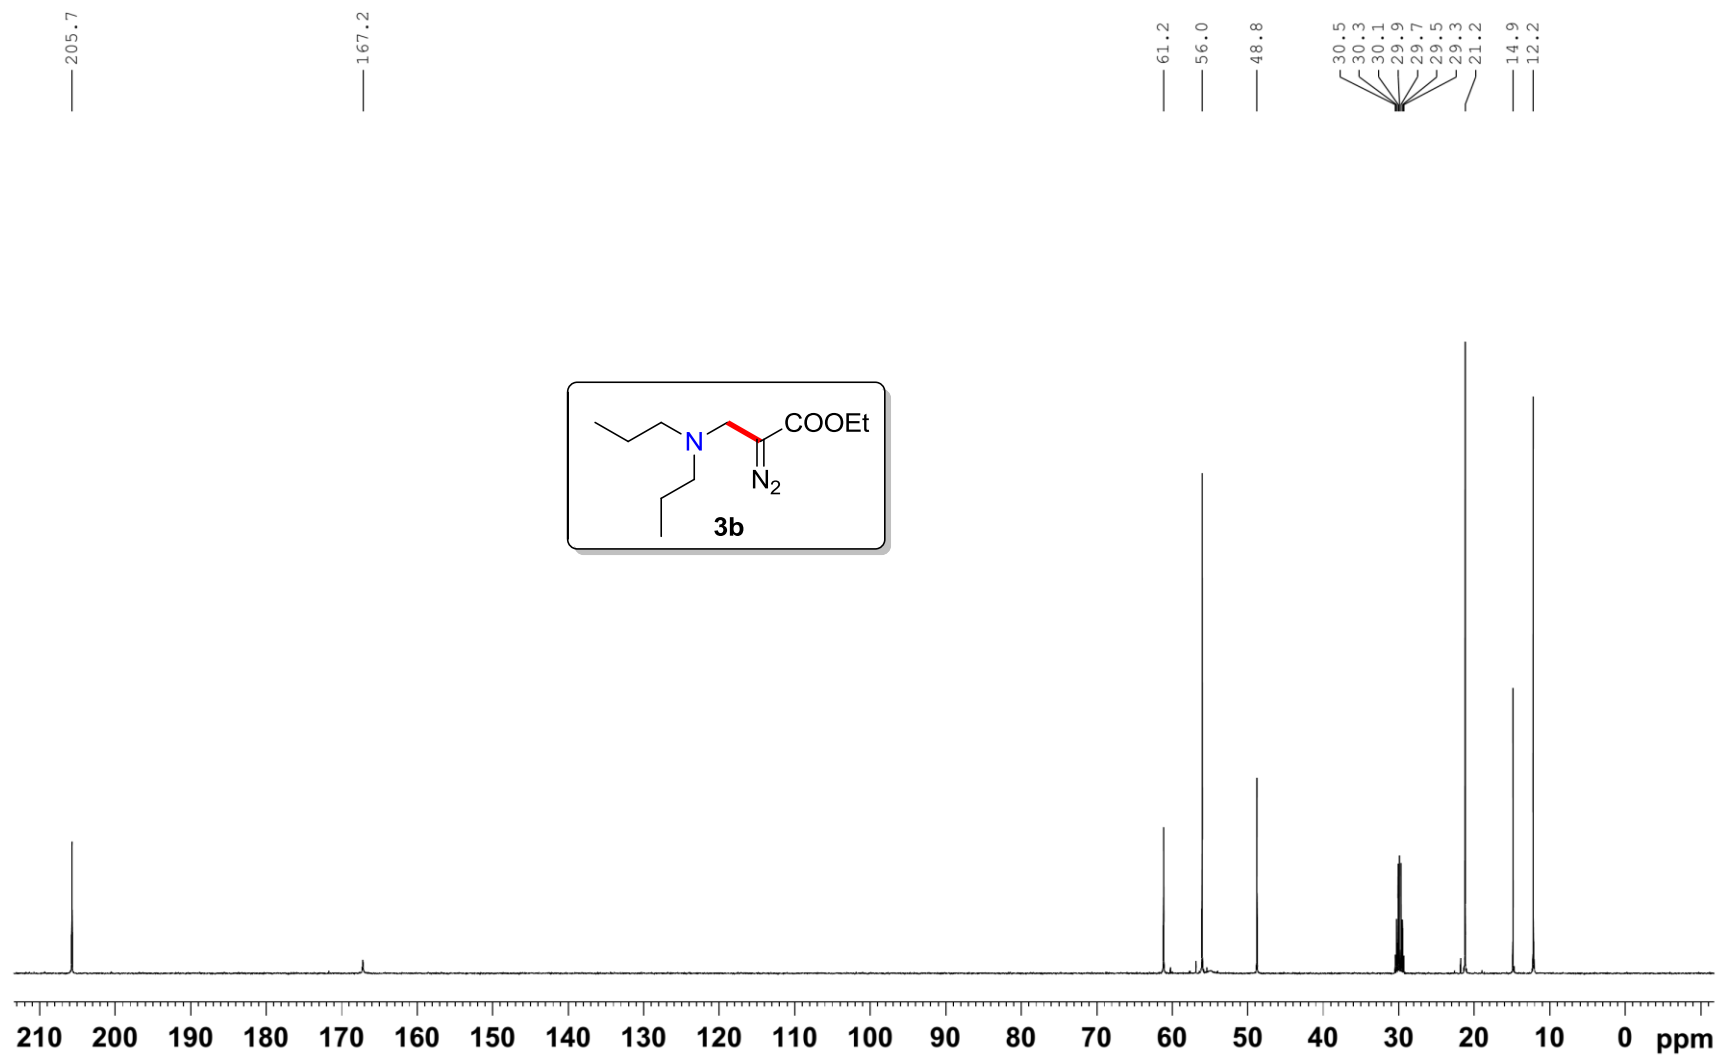

LJW-X15Y30-3-HNMR

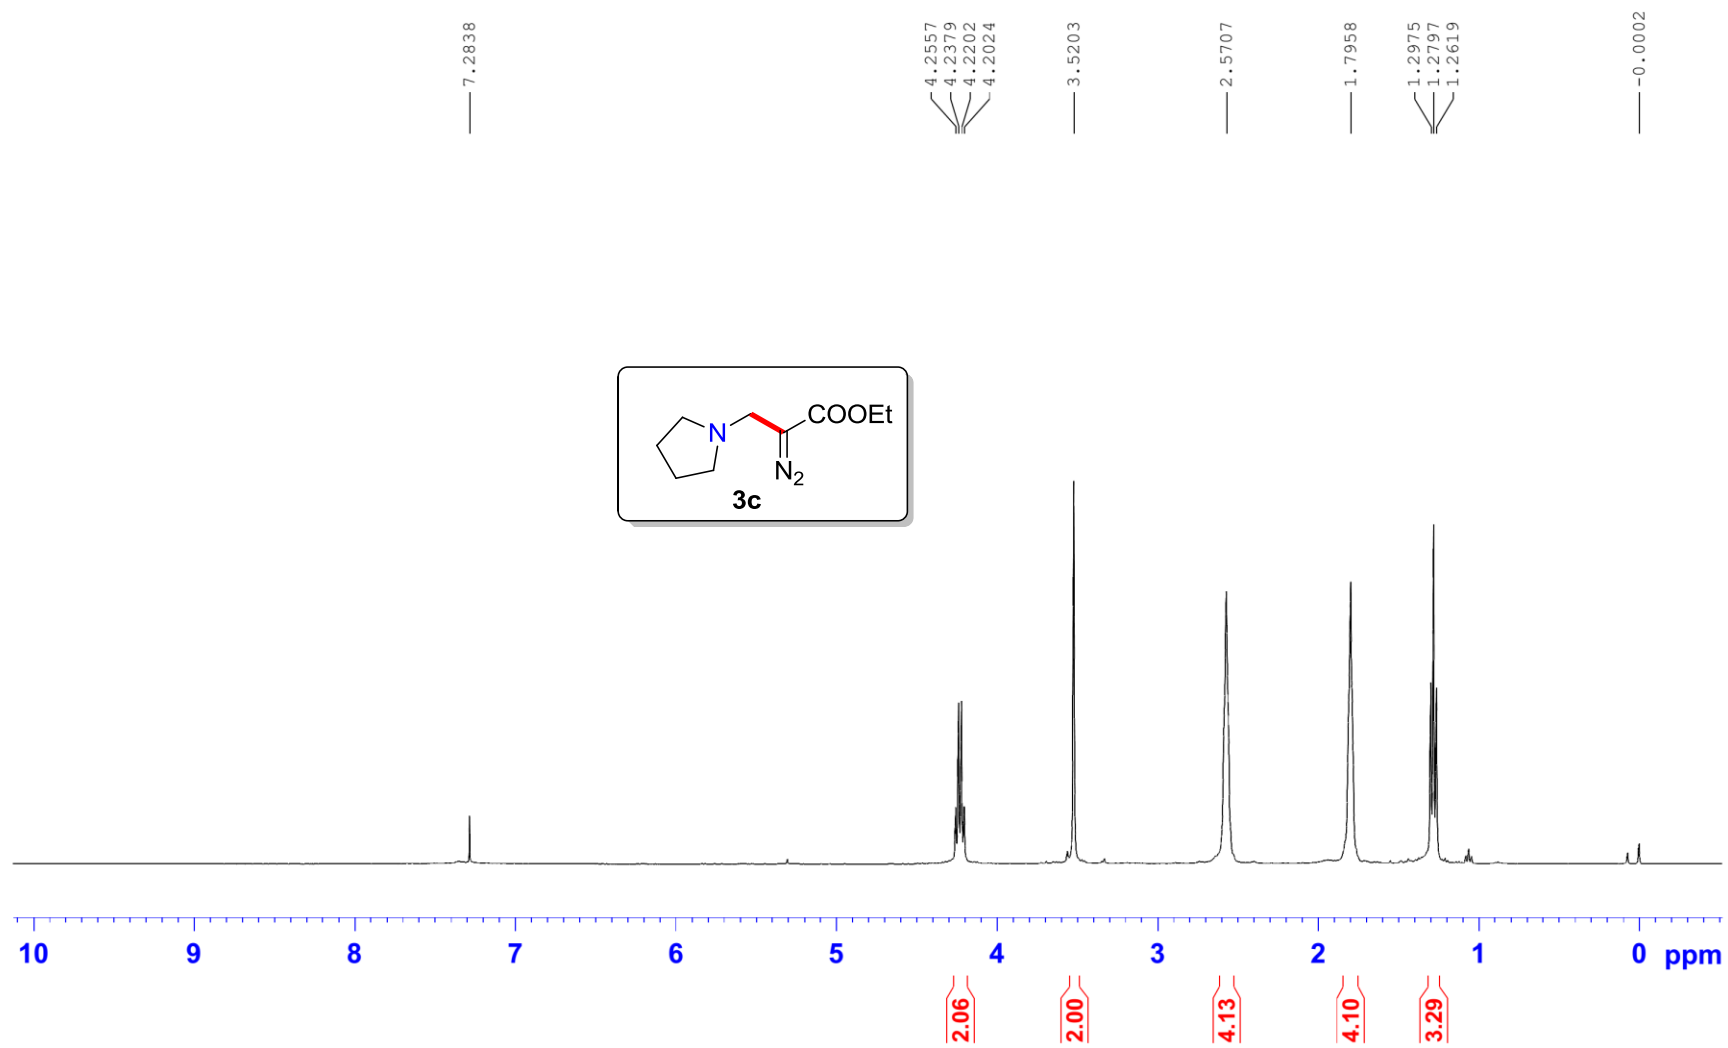



LJW-X15Z24-4-CNMR CDC13

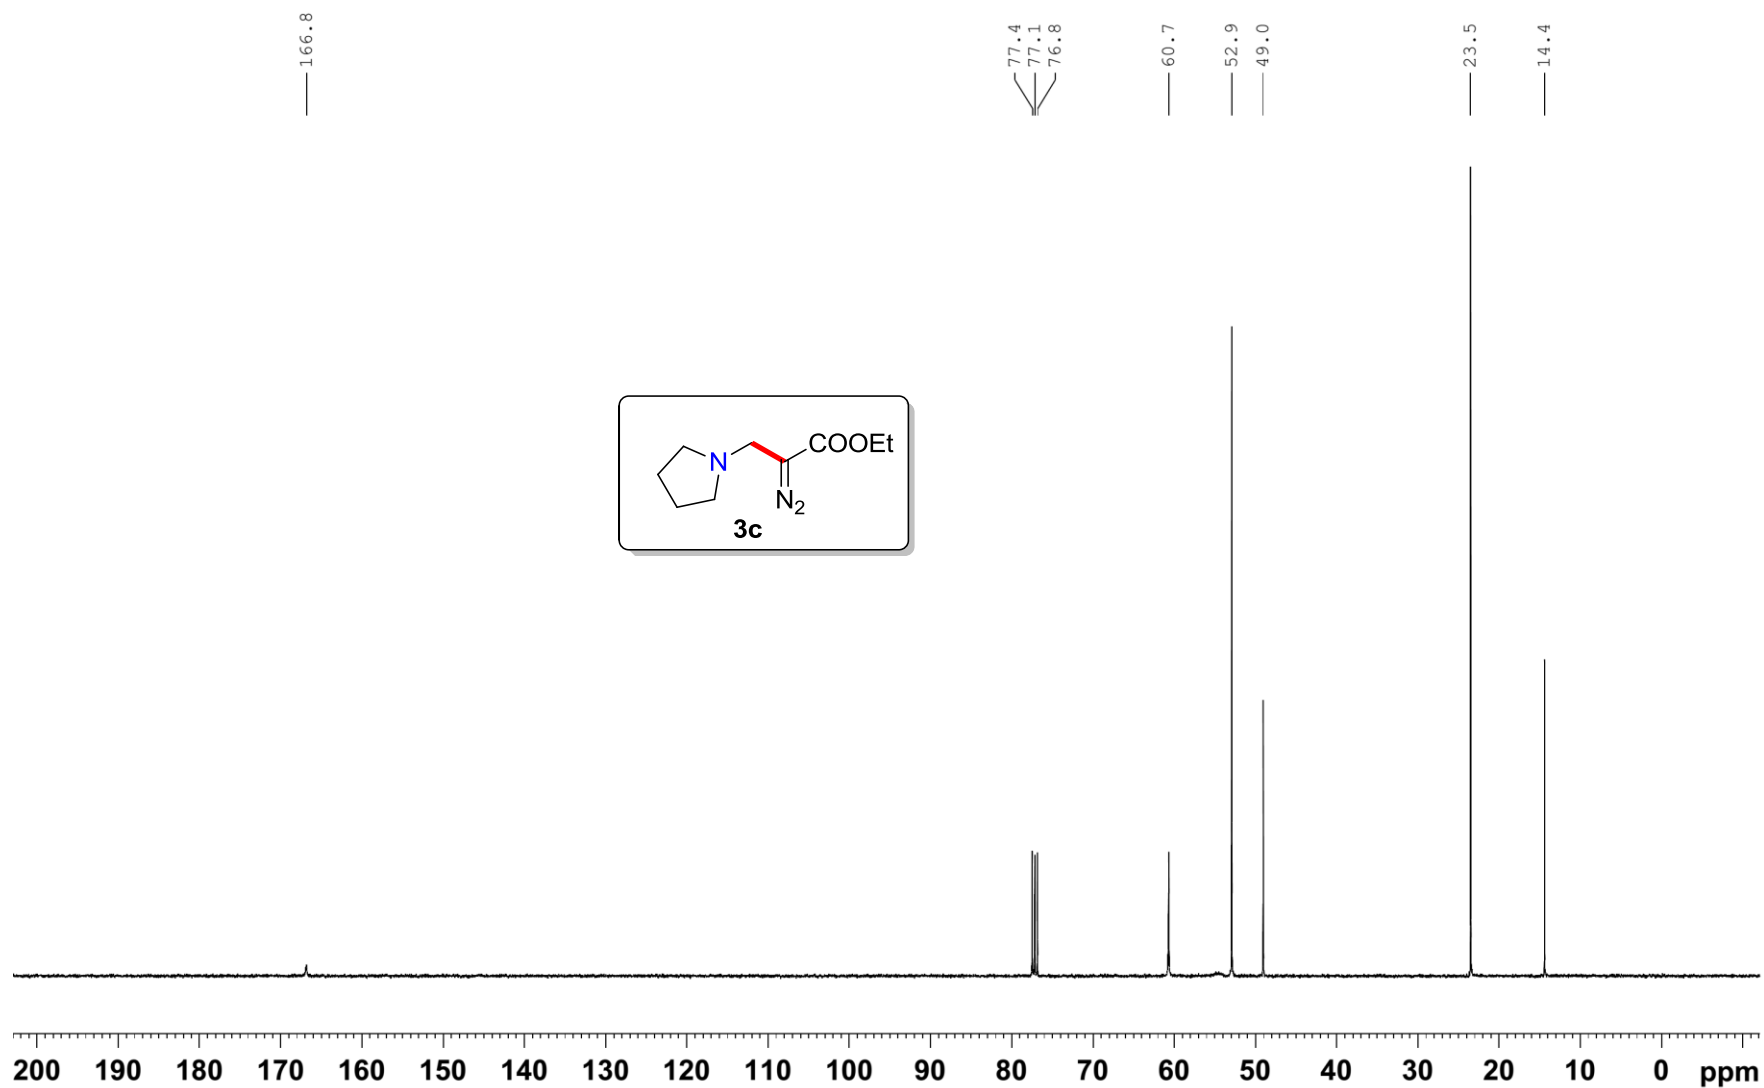

LJW-X15Y09-2-HNMR CDC13

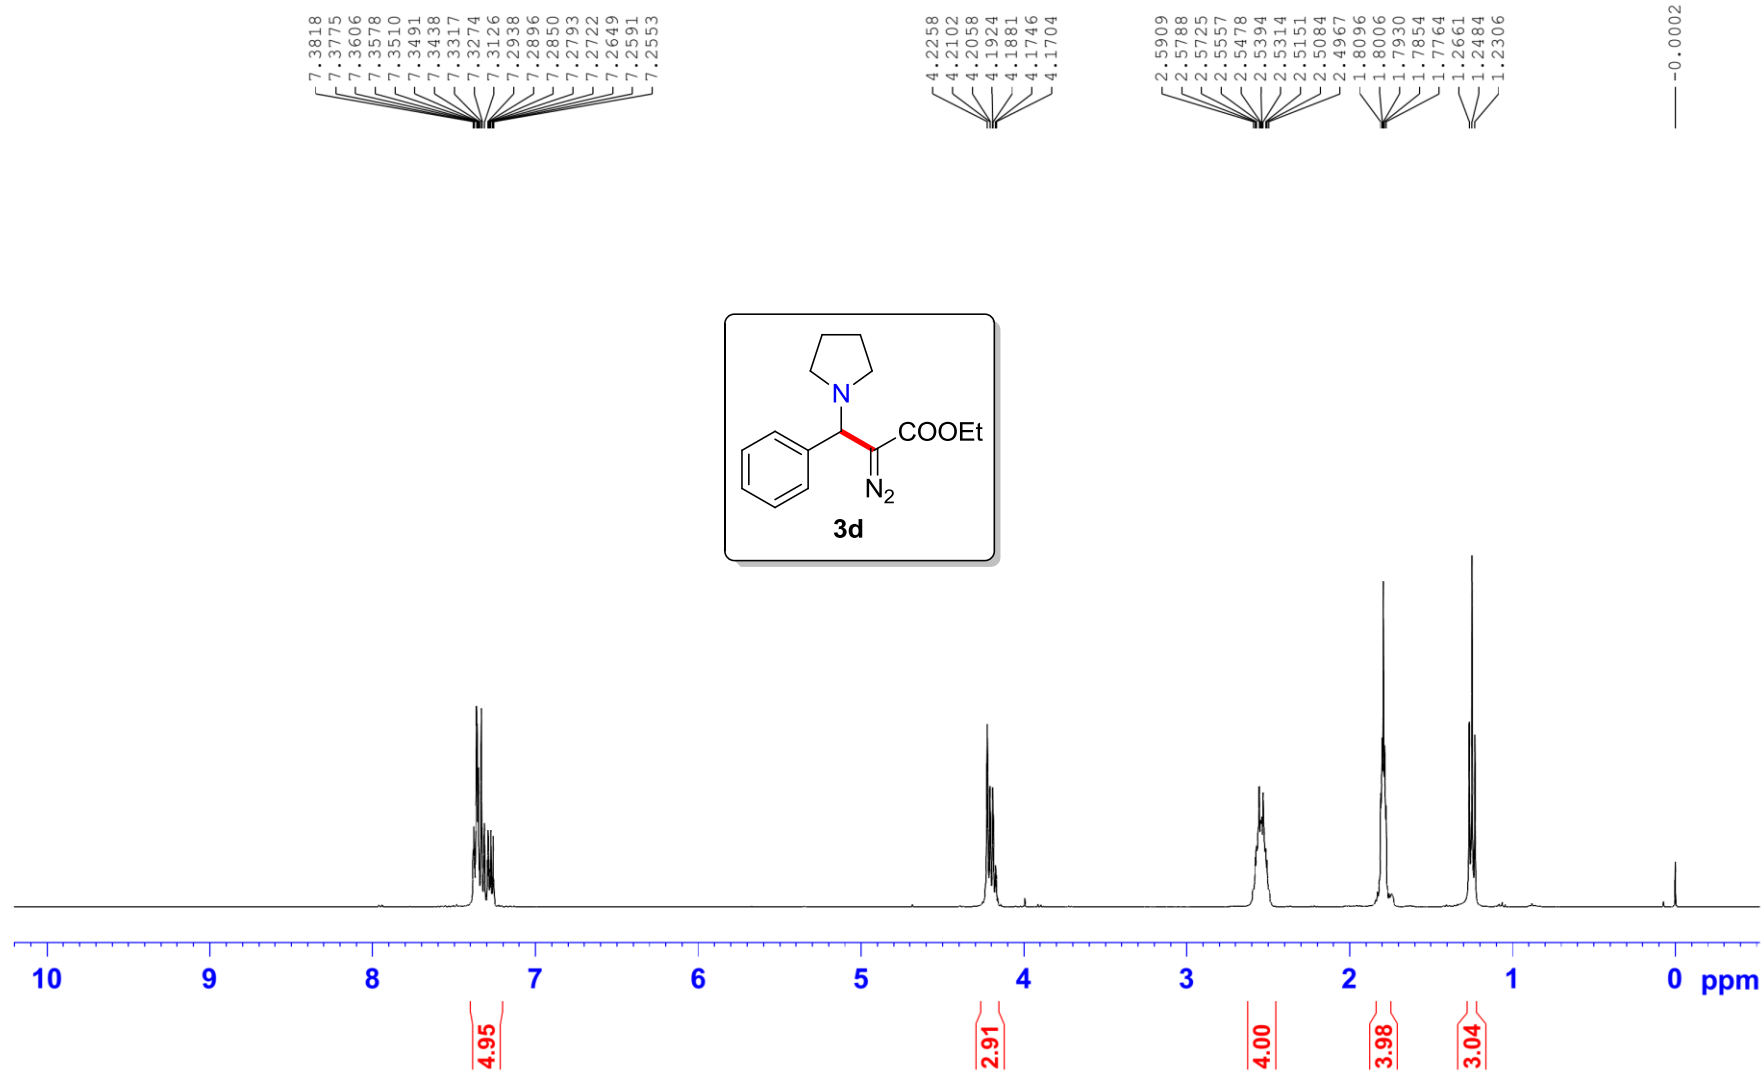

LJW-X15Z09-1-CNMR acetone-d6

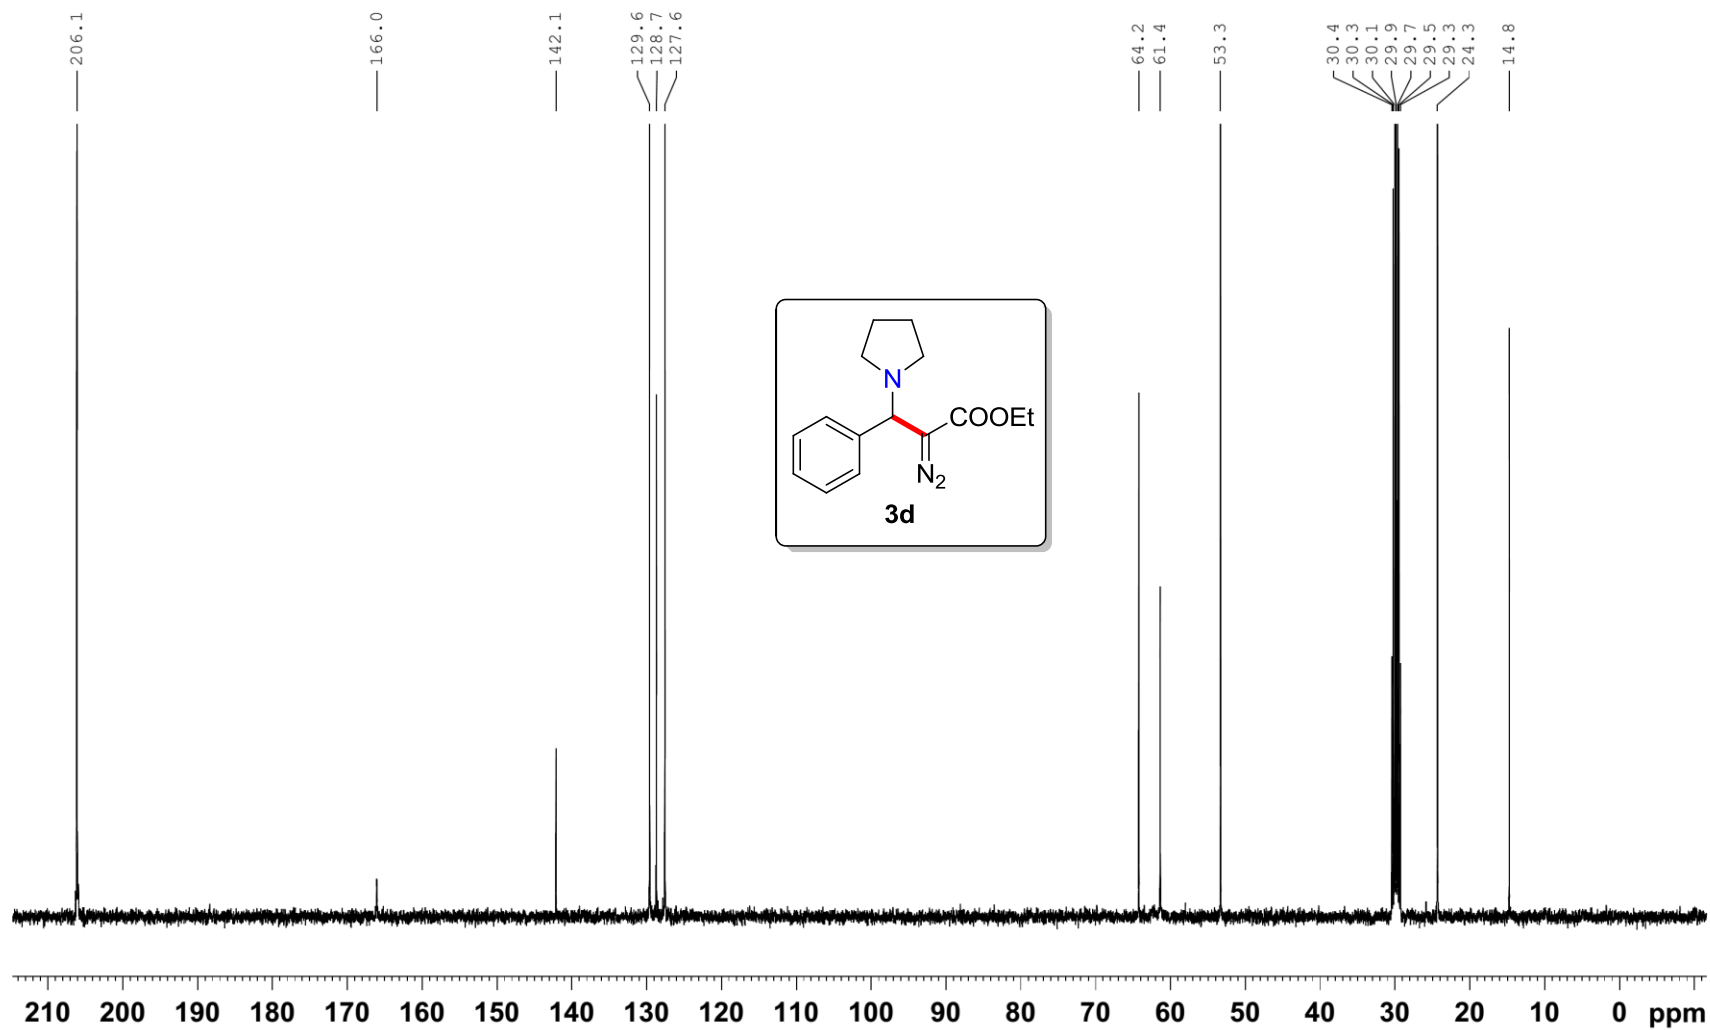

LJW-X15Y23-2-HNMR CDCl<sub>3</sub>

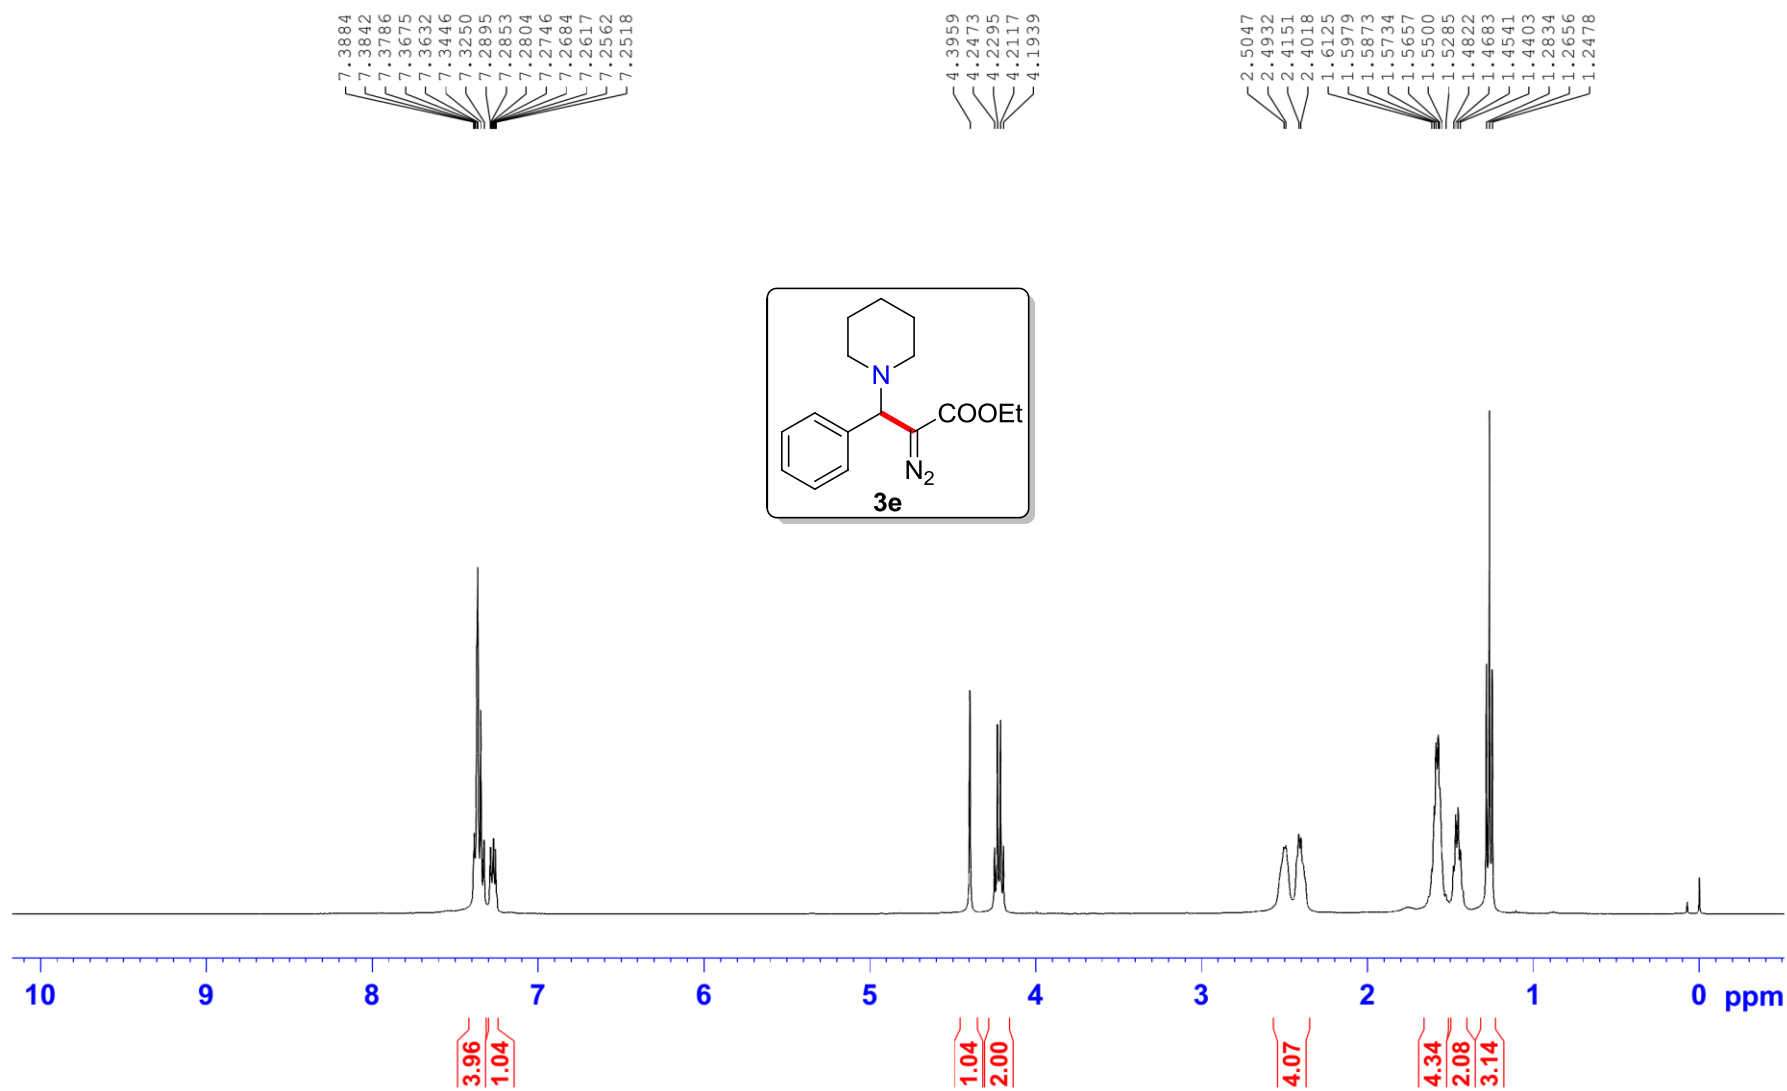

LJW-X15Z09-2-CNMR DMSO-d6

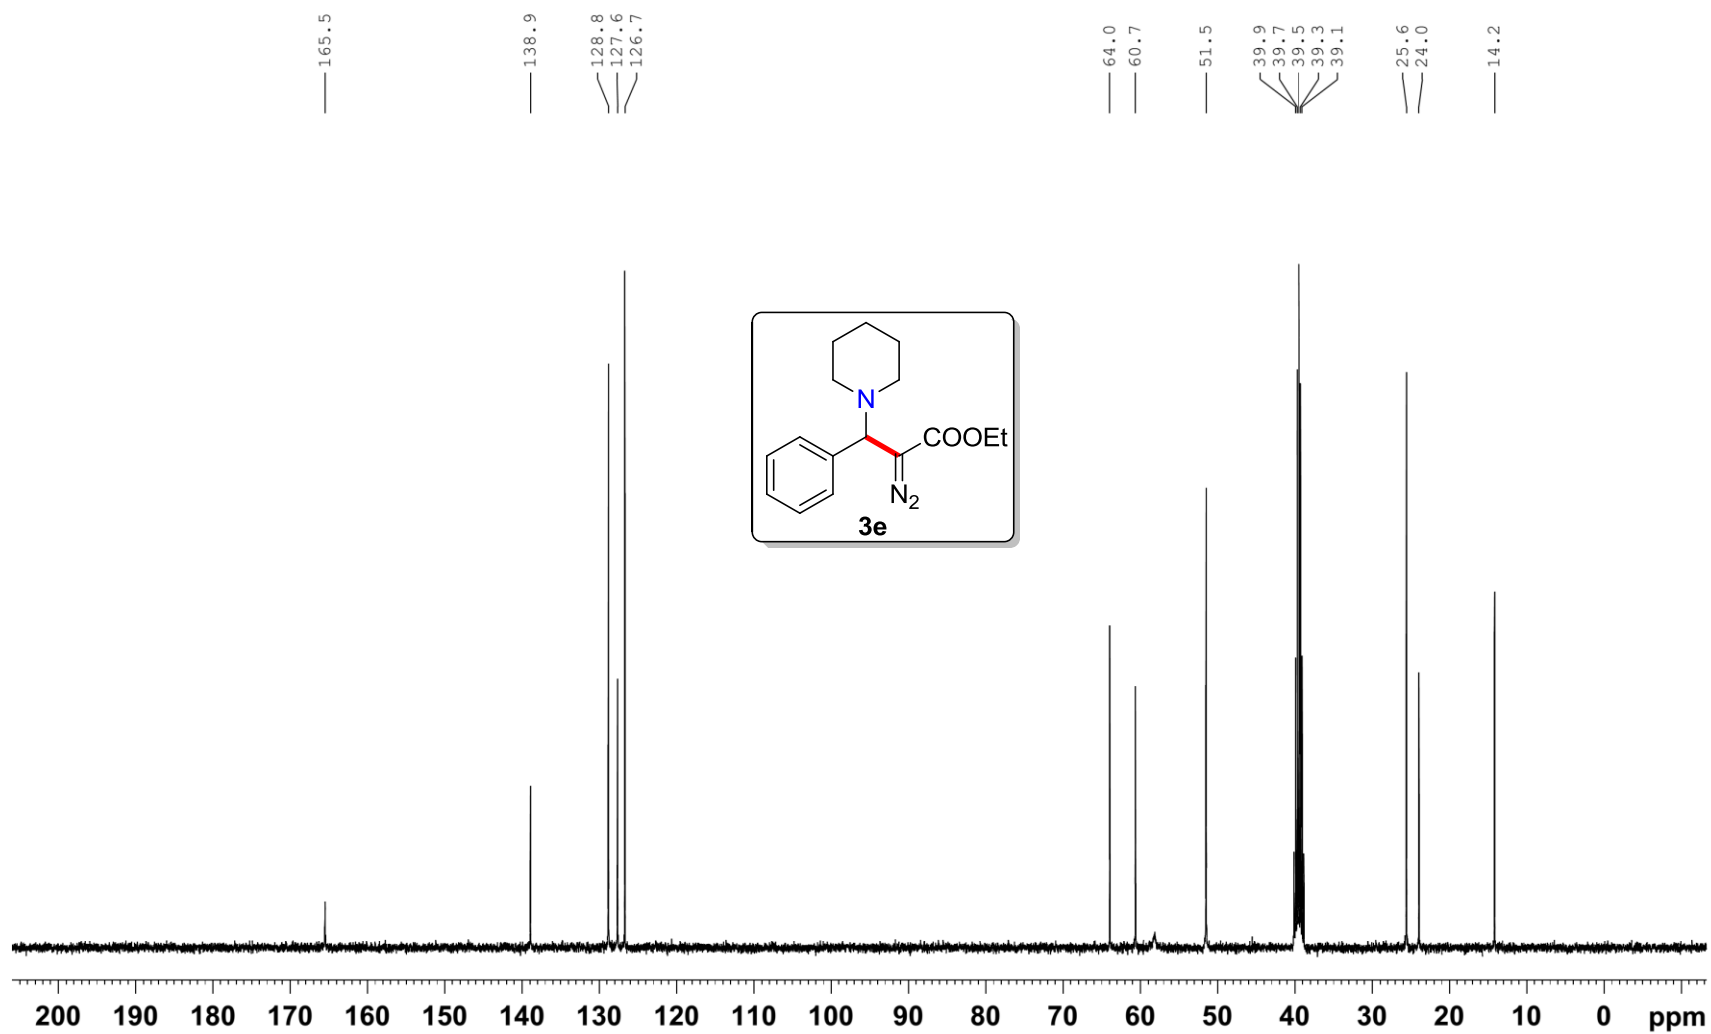

LJW-X15Z17-3-HNMR DMSO-d6

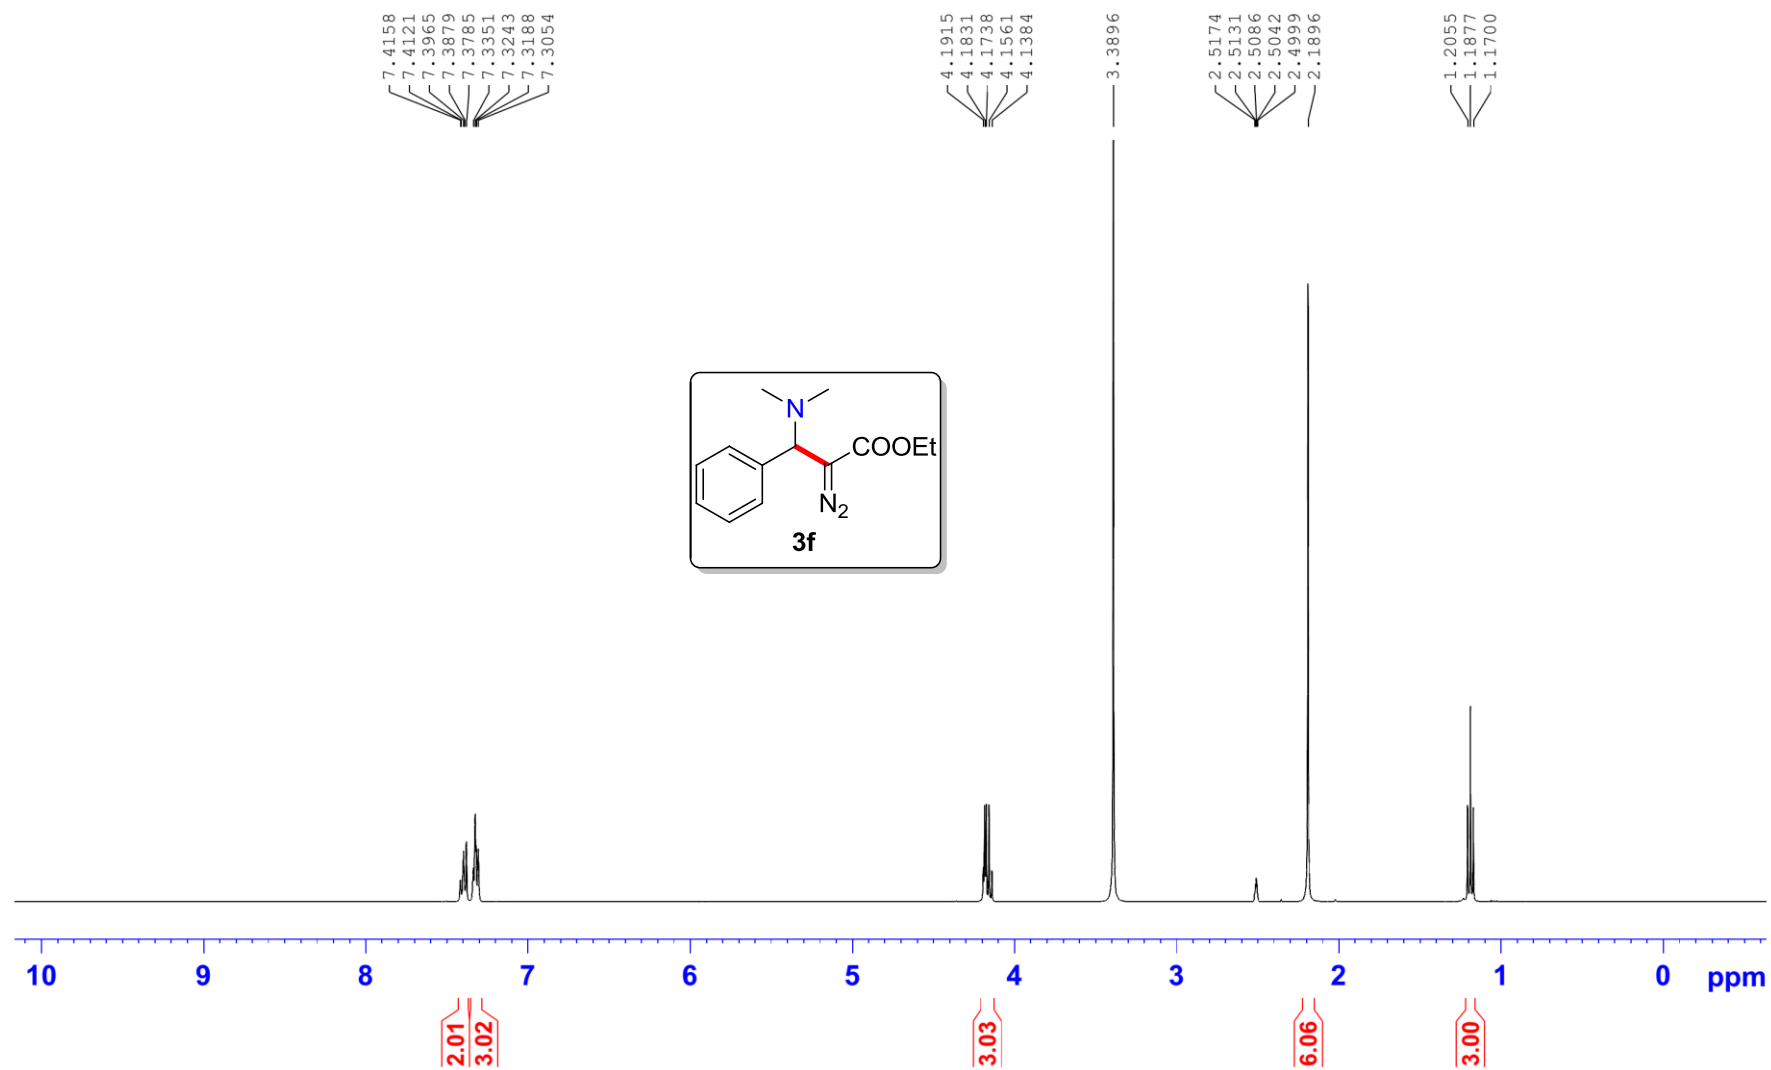

LJW-X15Z16-7-CNMR DMSO-d6

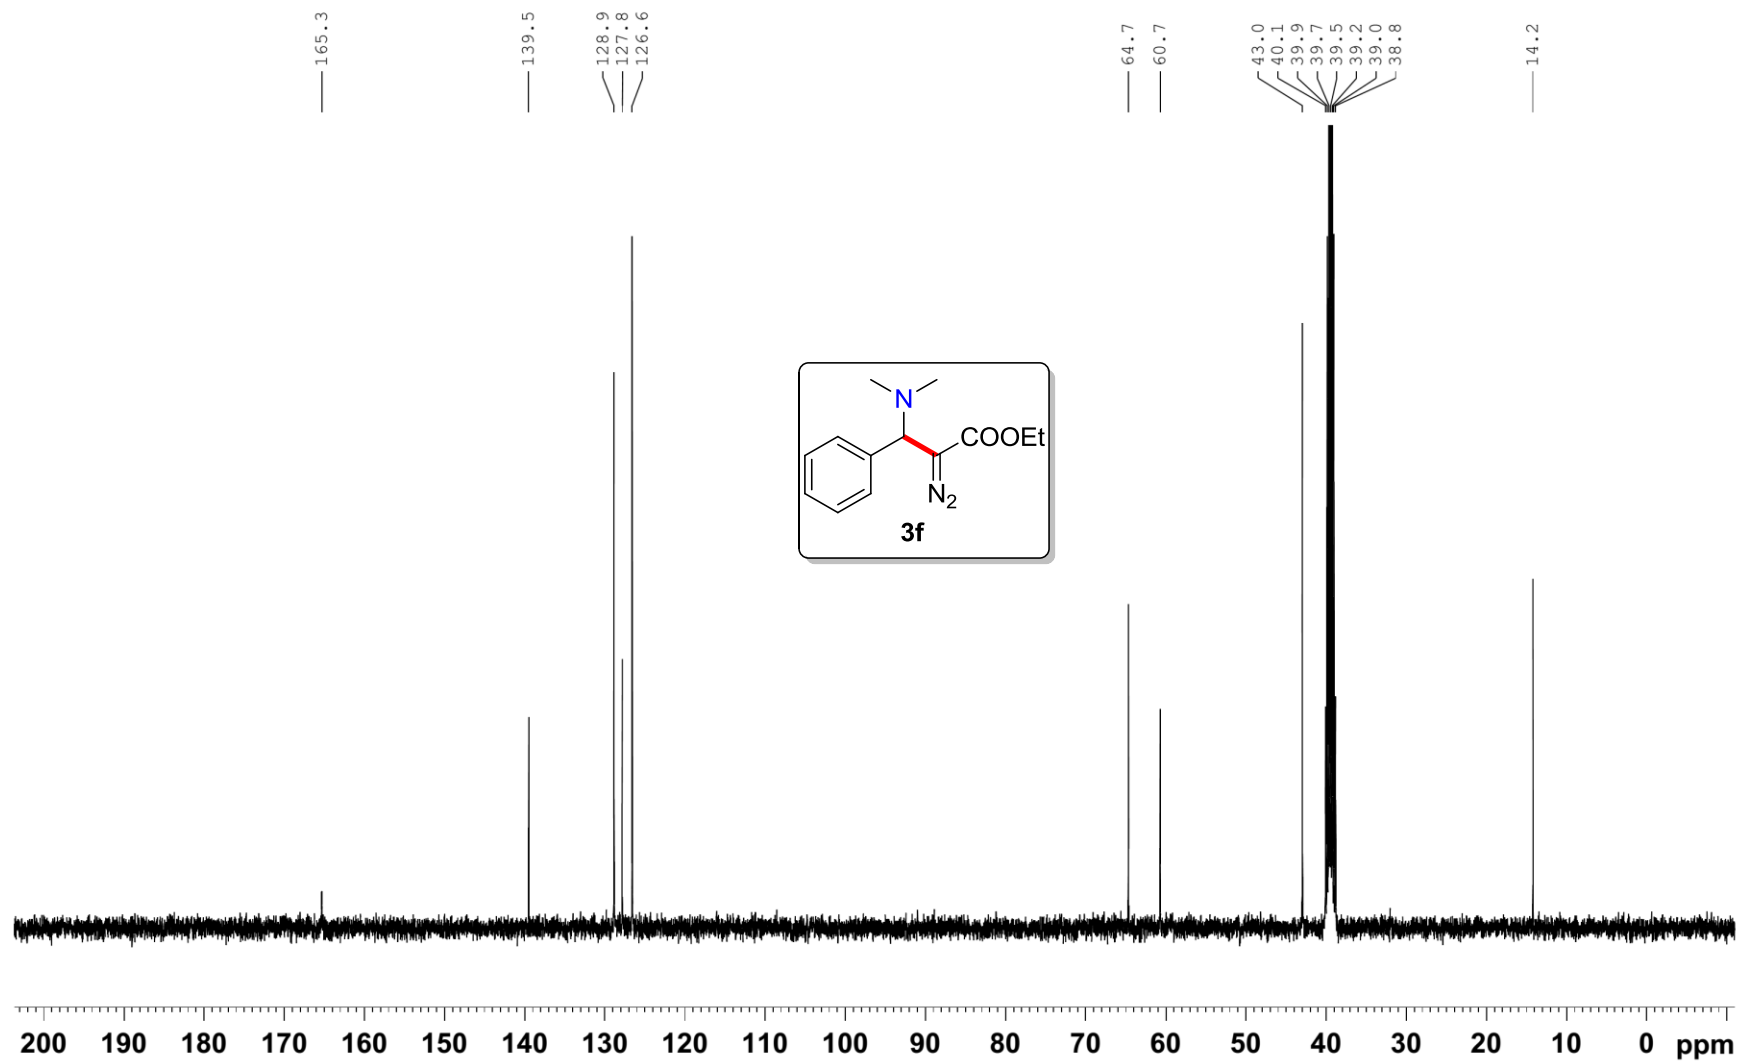

LJW-X15Z30-7-HNMR CDC13

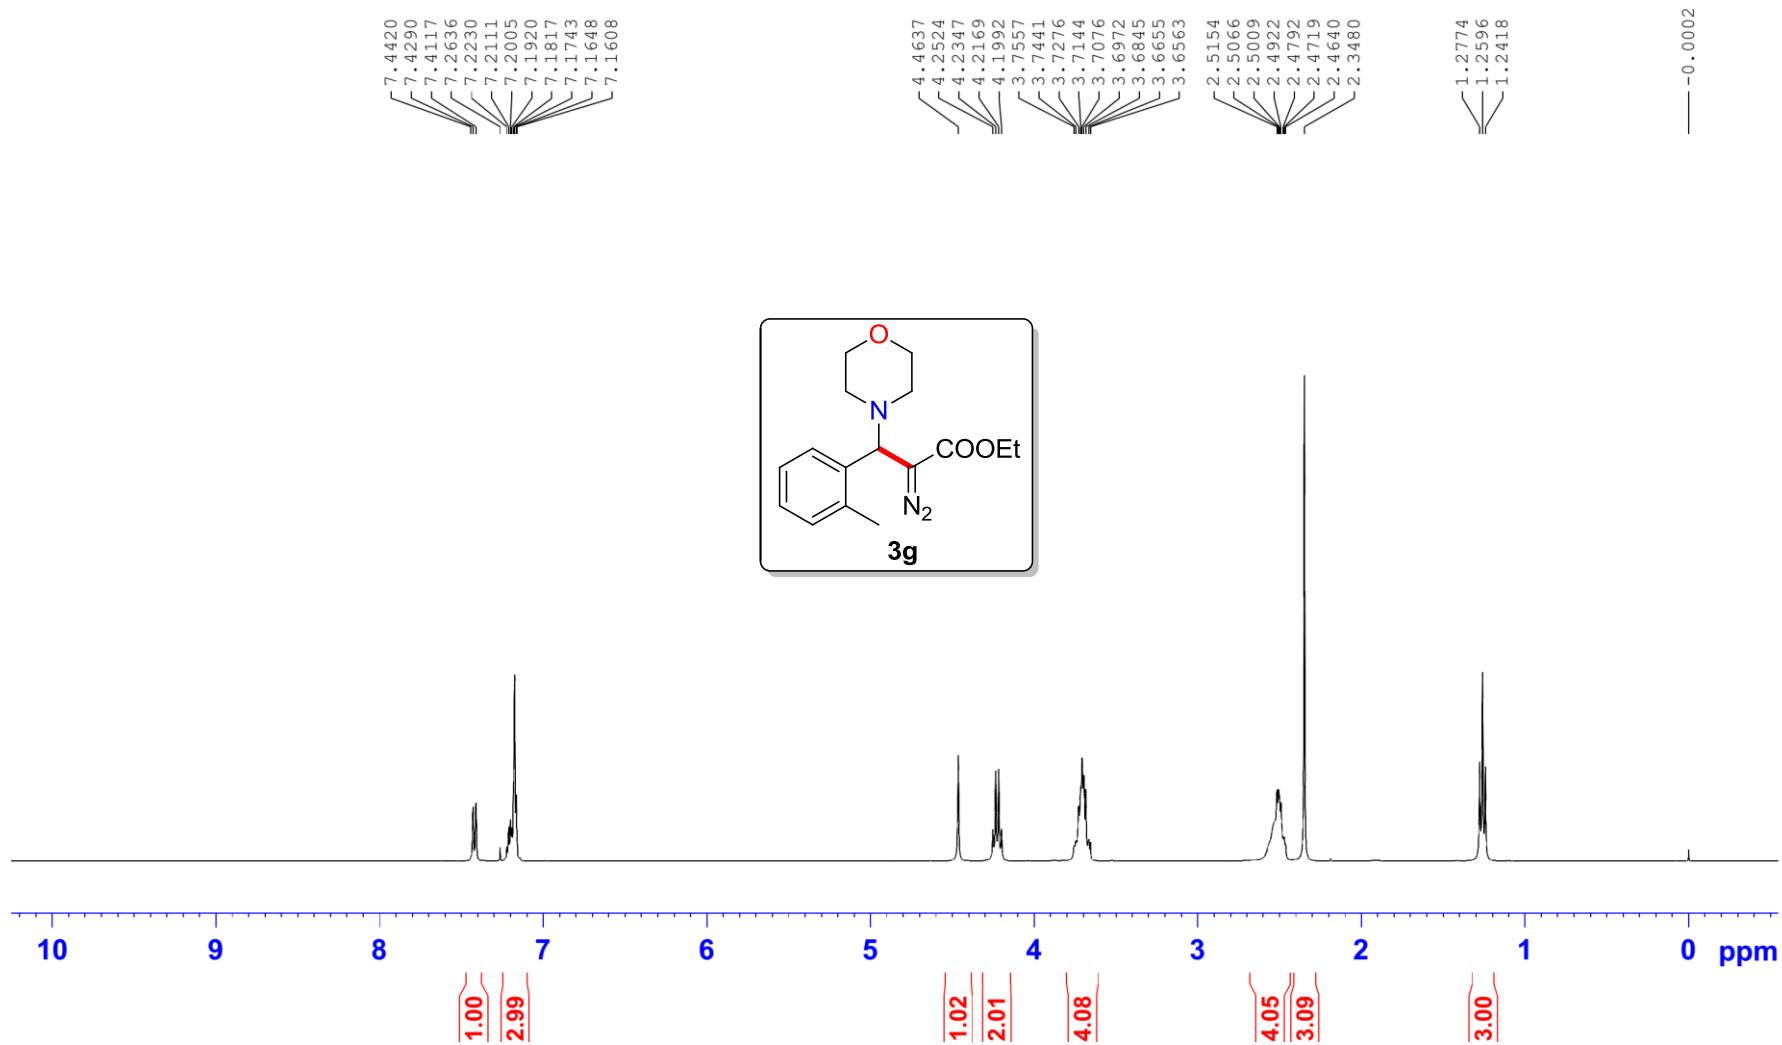



LJW-X160104-2-CNMR CDC13

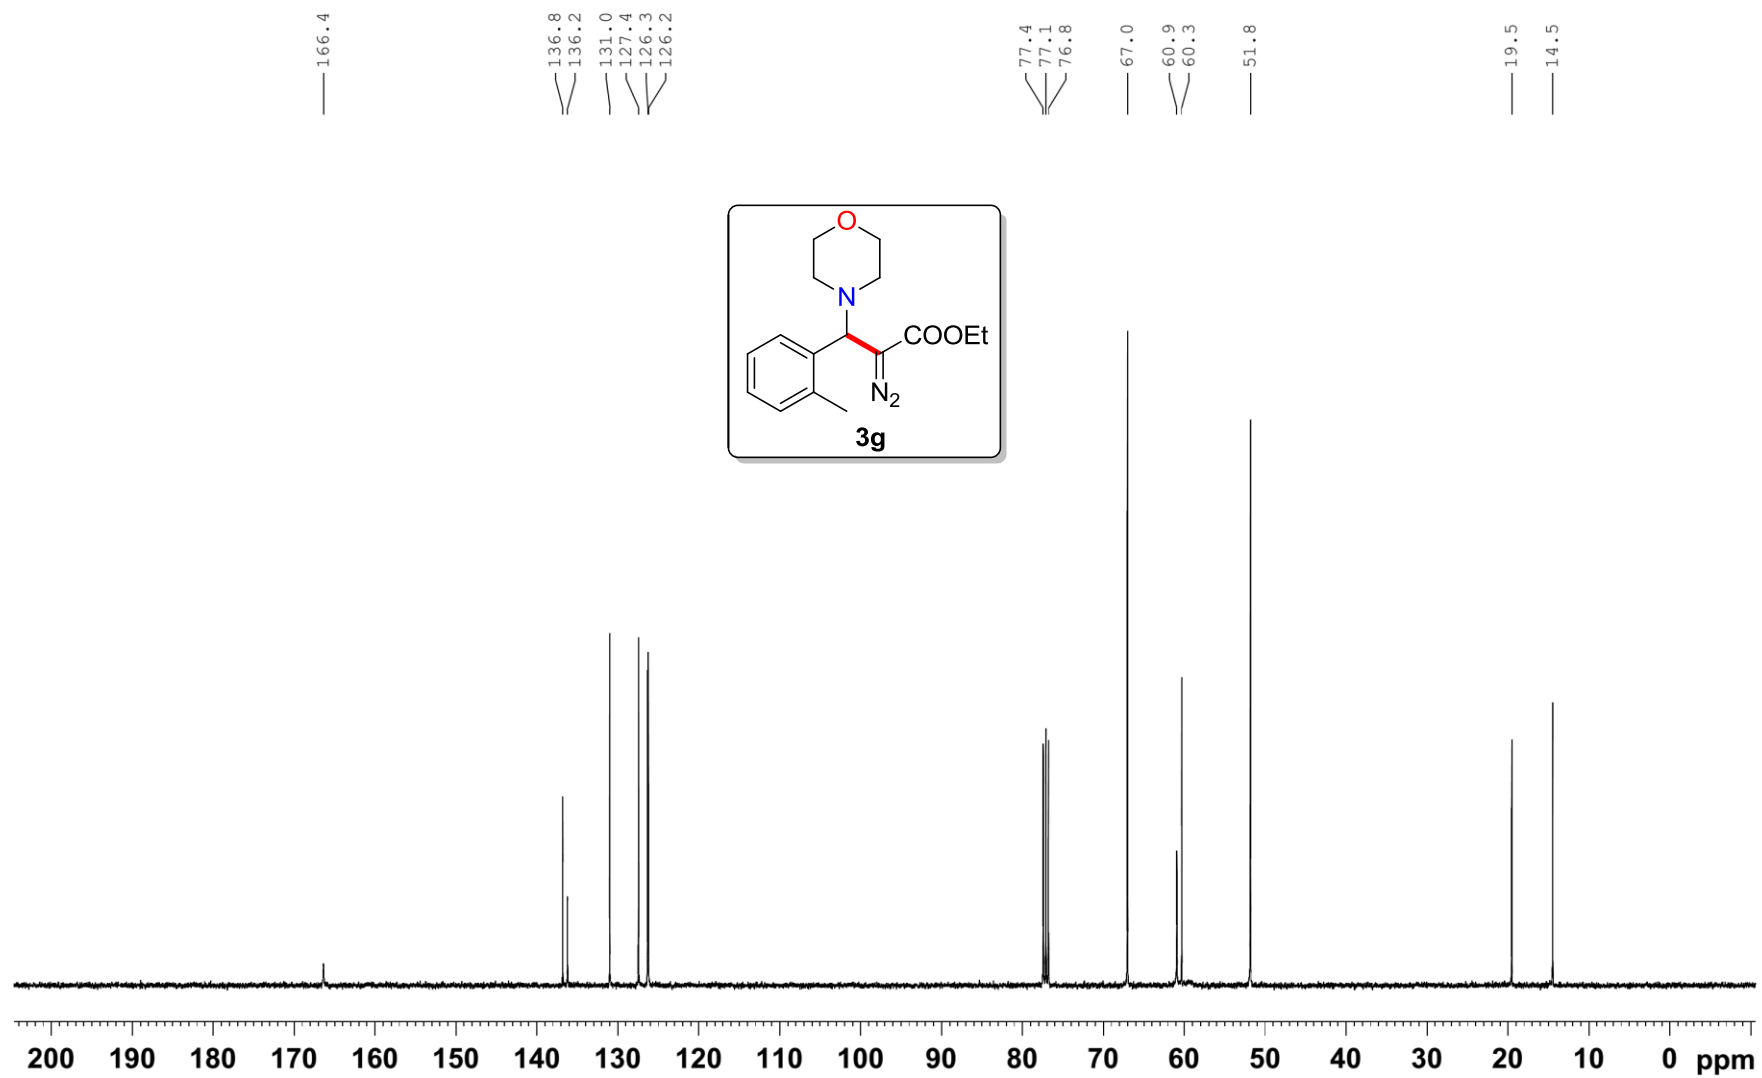

LJW-X15Z30-8-HNMR CDC13

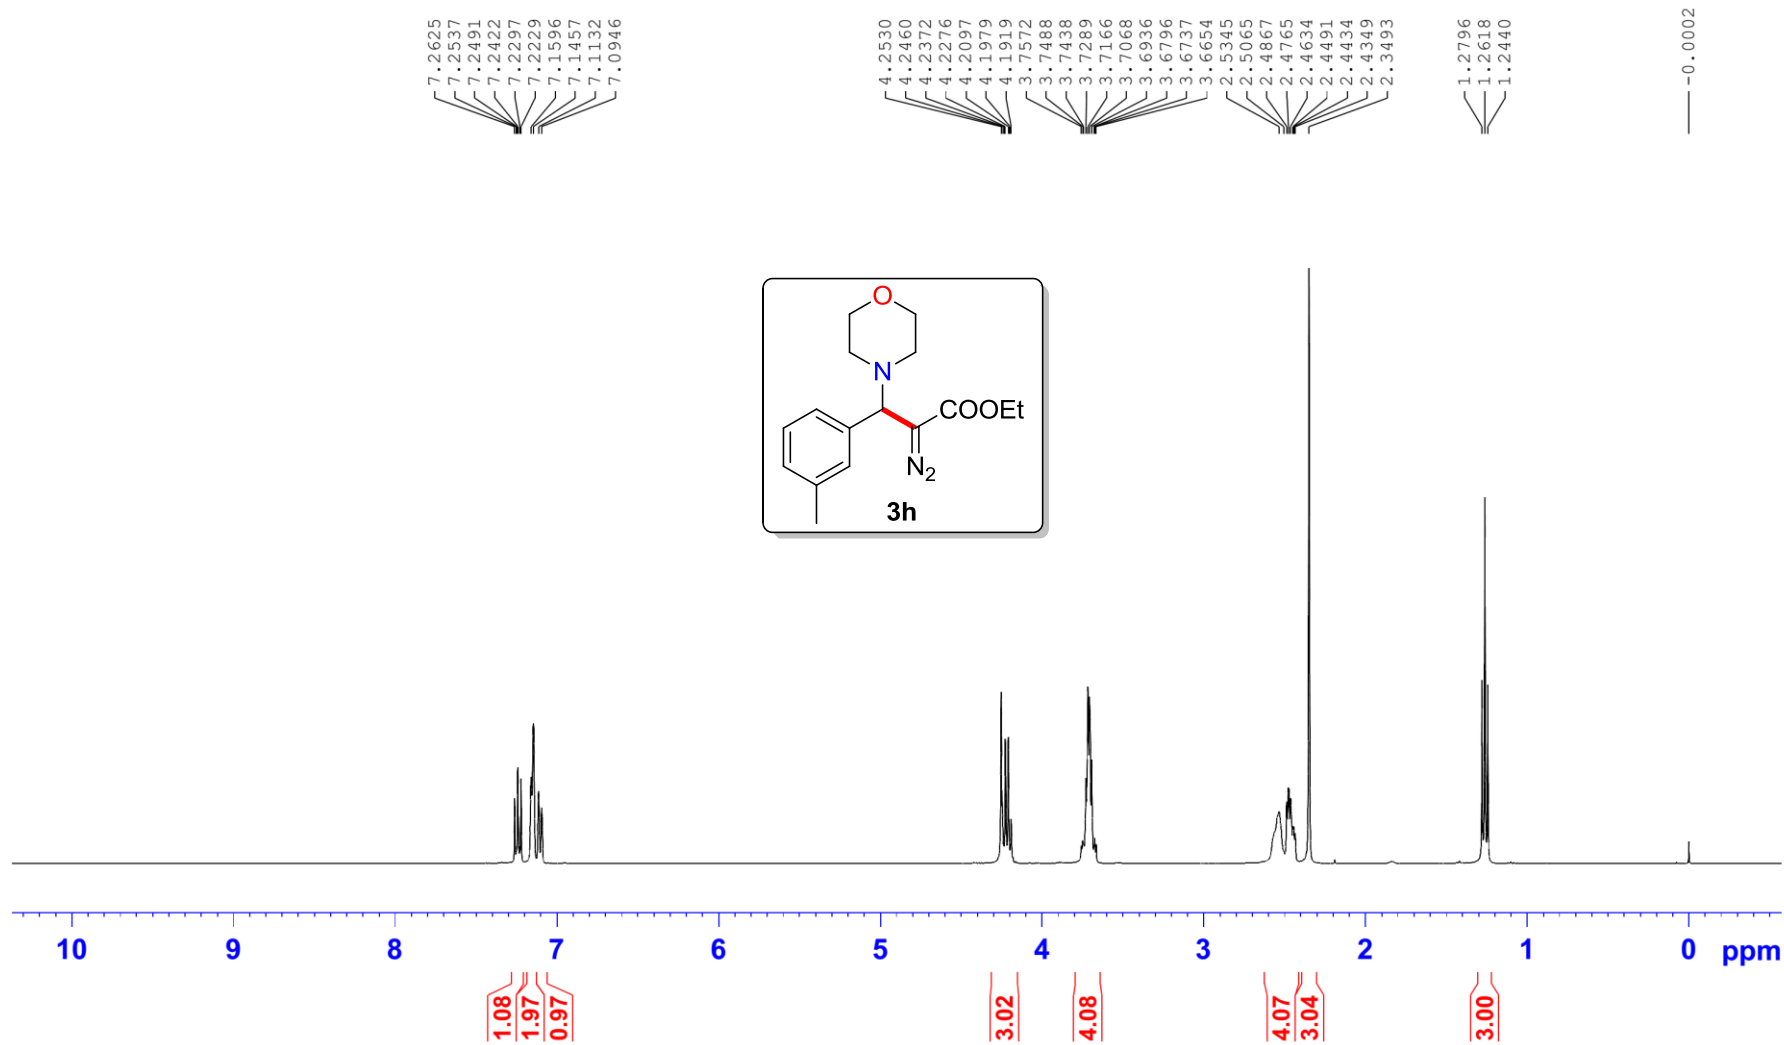

LJW-X160104-3-CNMR CDC13

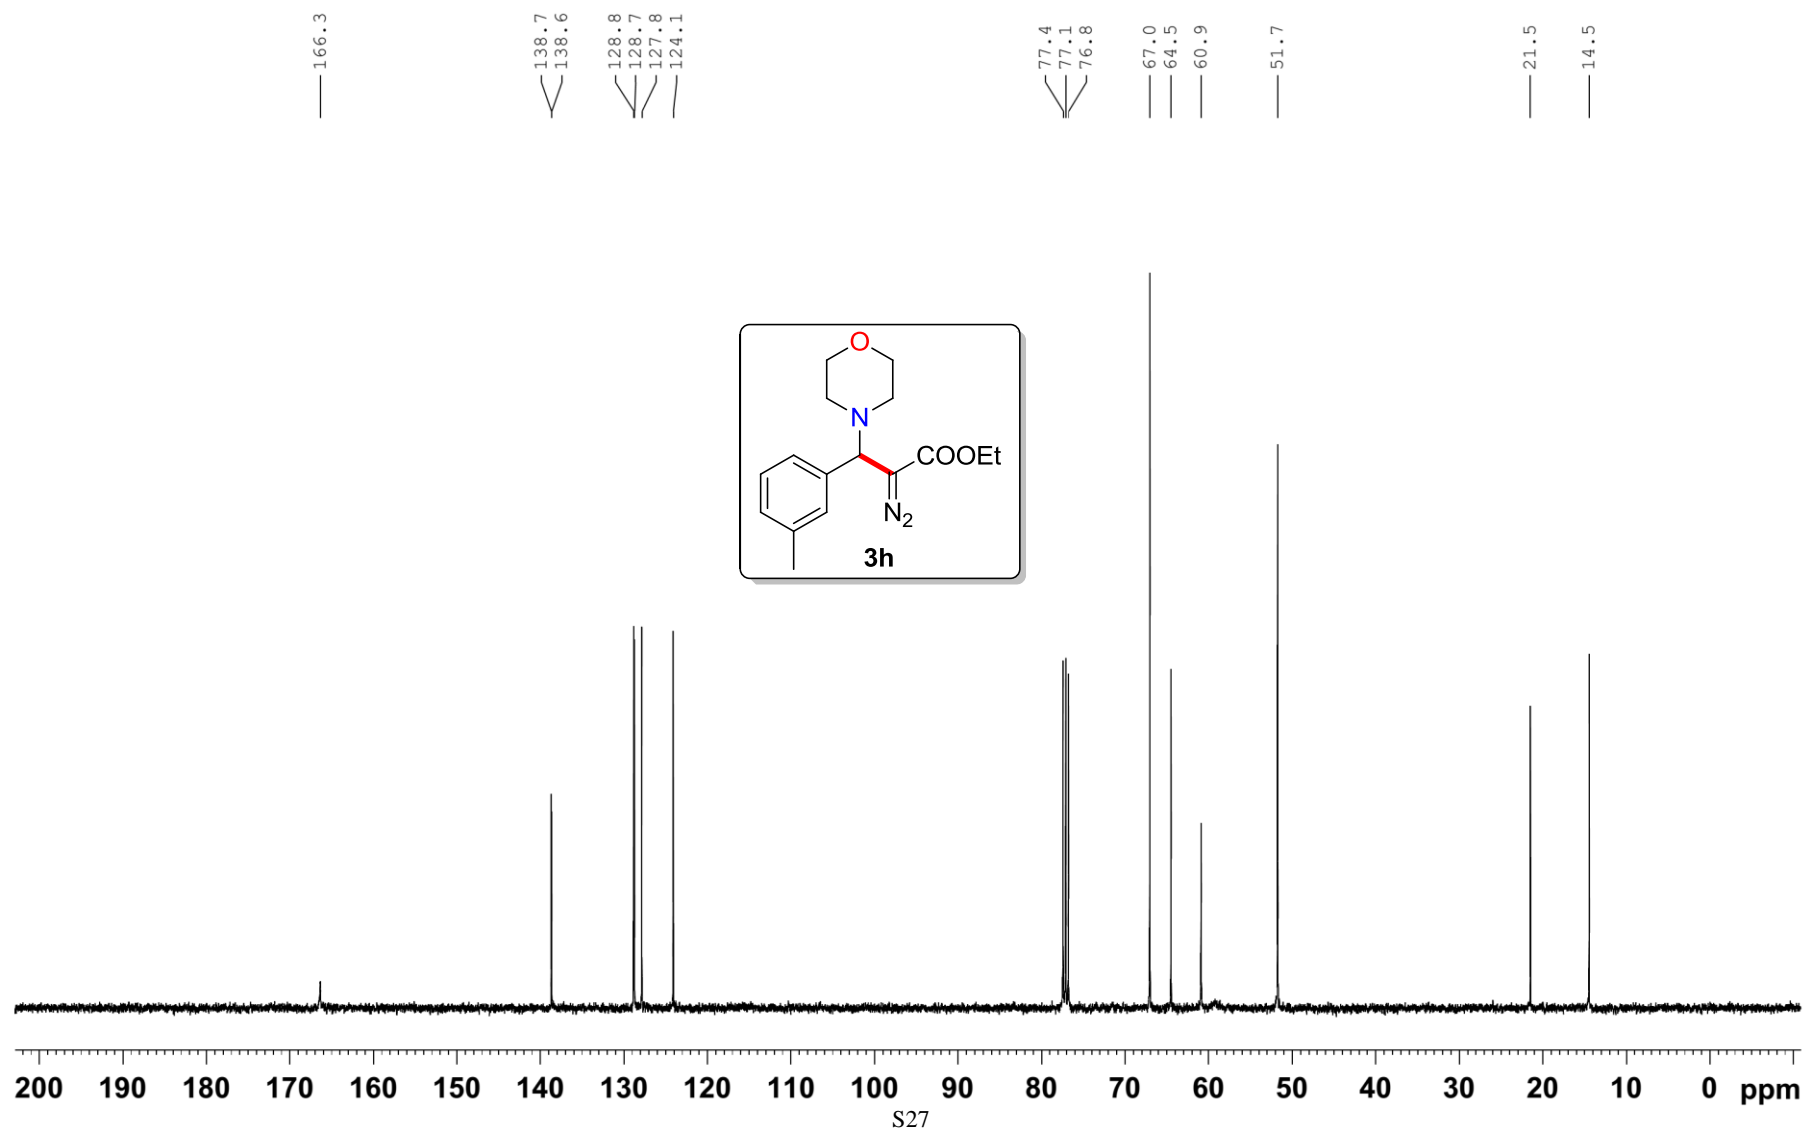

LJW-X15Z30-9-HNMR CDC13

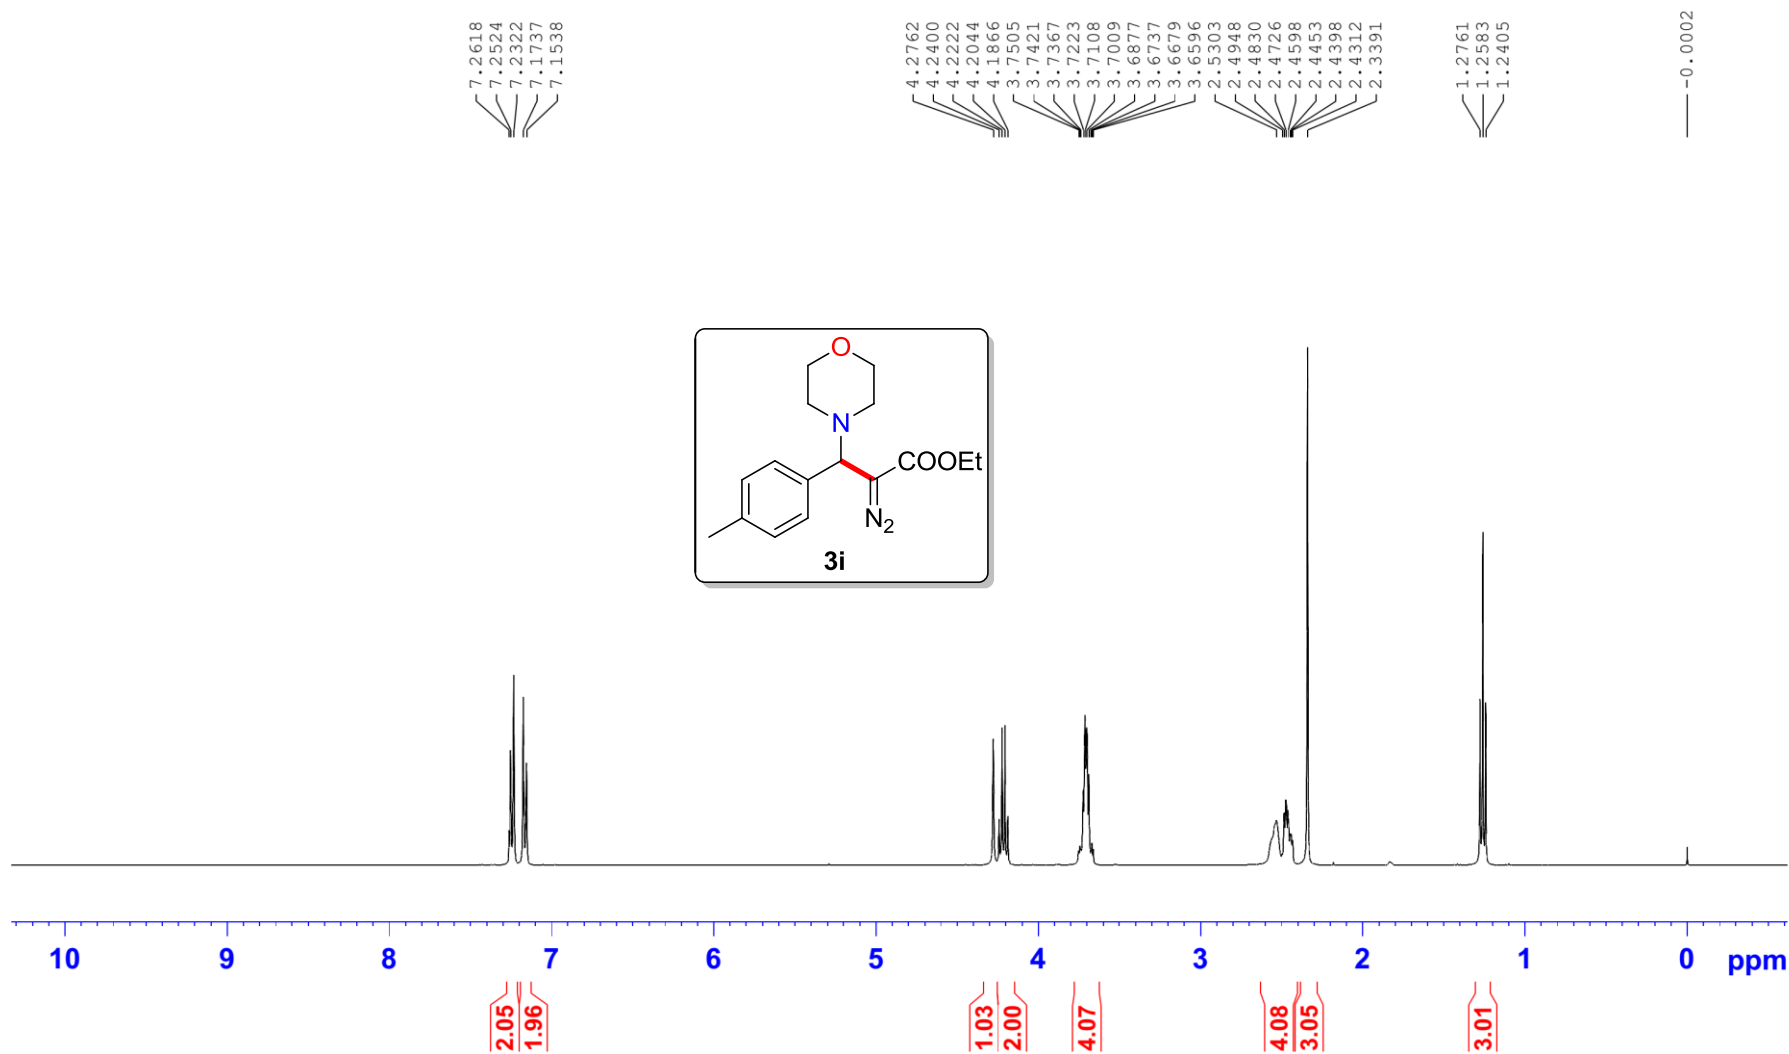

LJW-X160104-4-CNMR CDC13

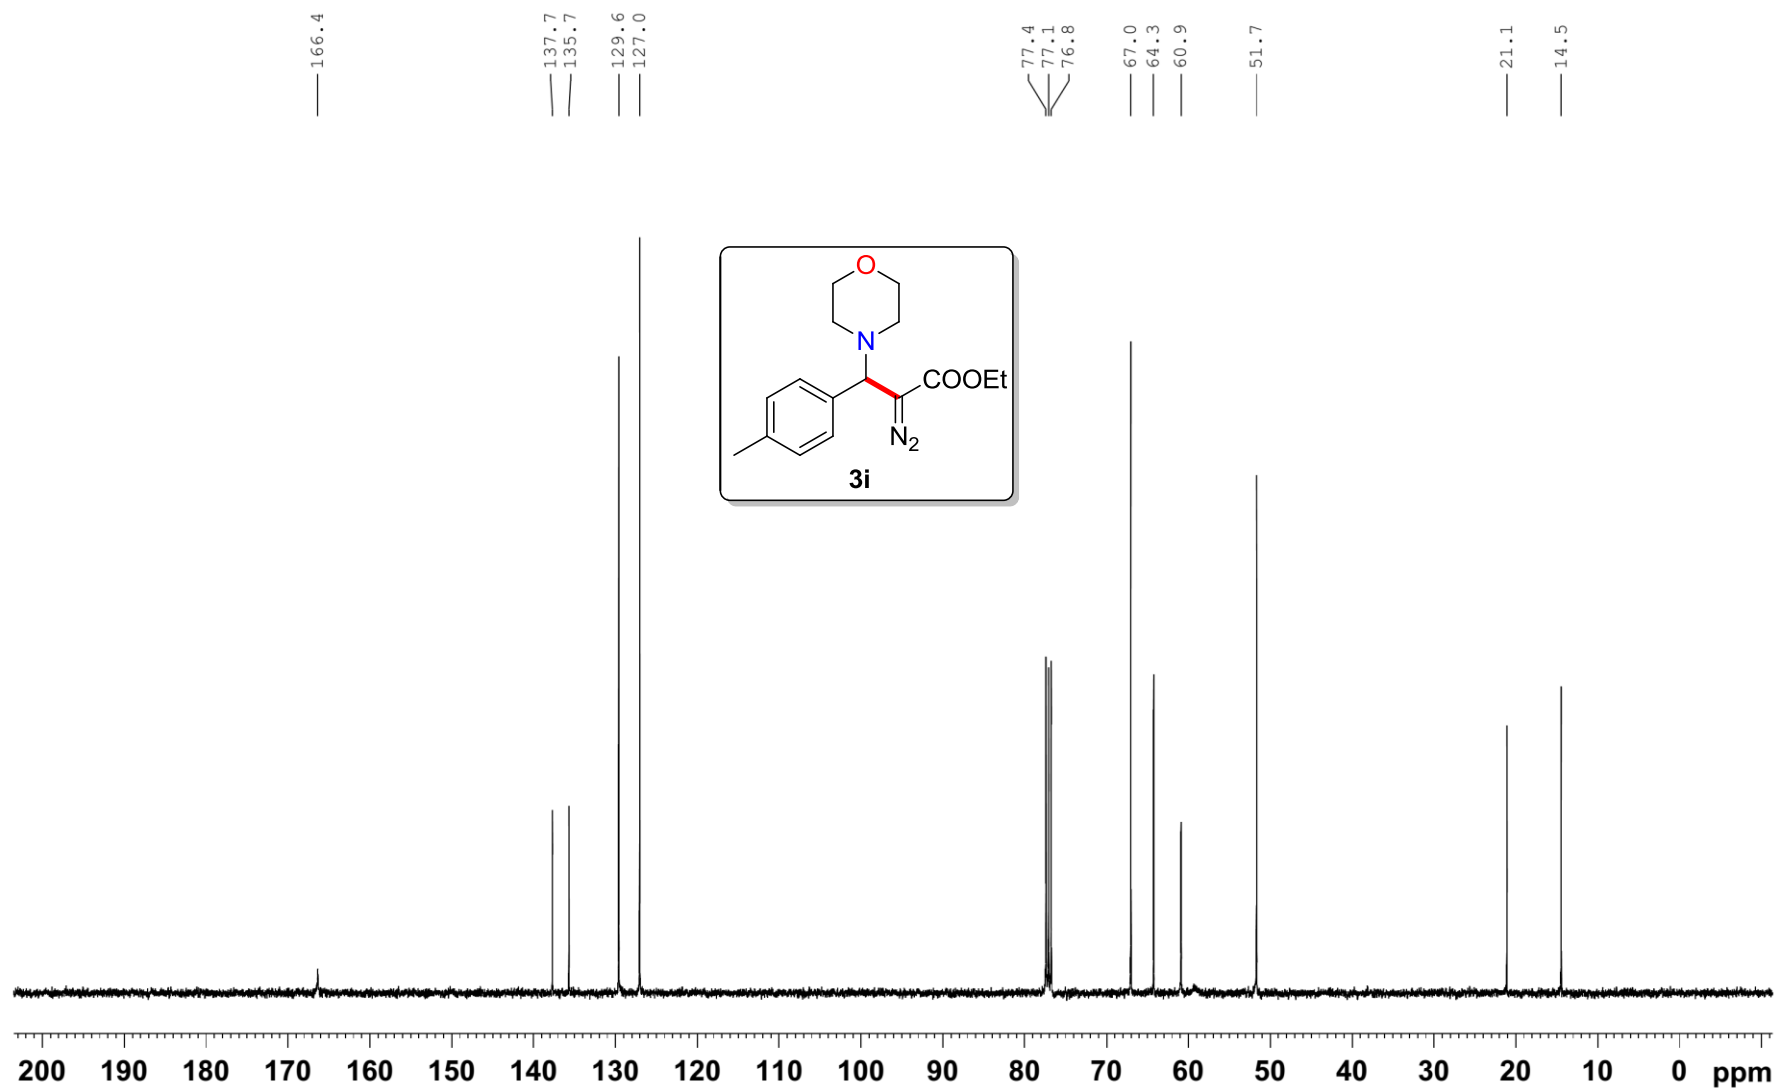

LJW-X15Z29-7-HNMR CDC13

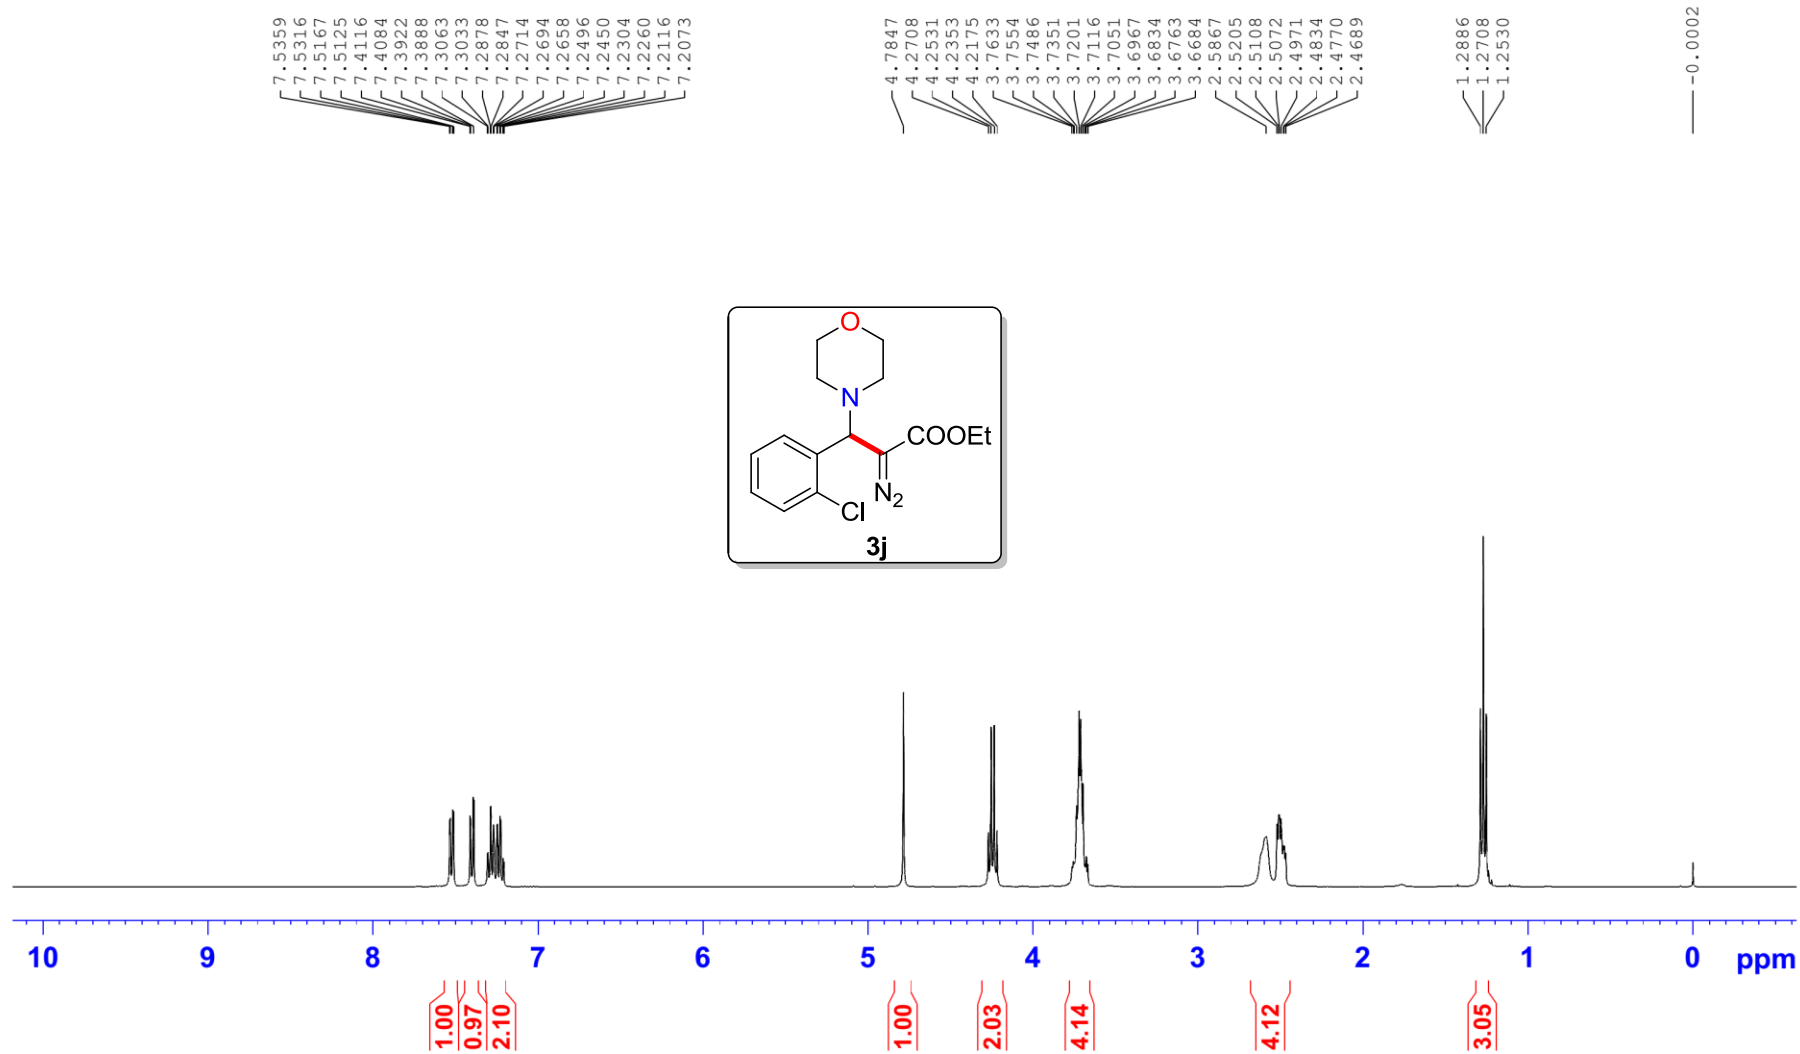

LJW-X160104-6-CNMR CDC13

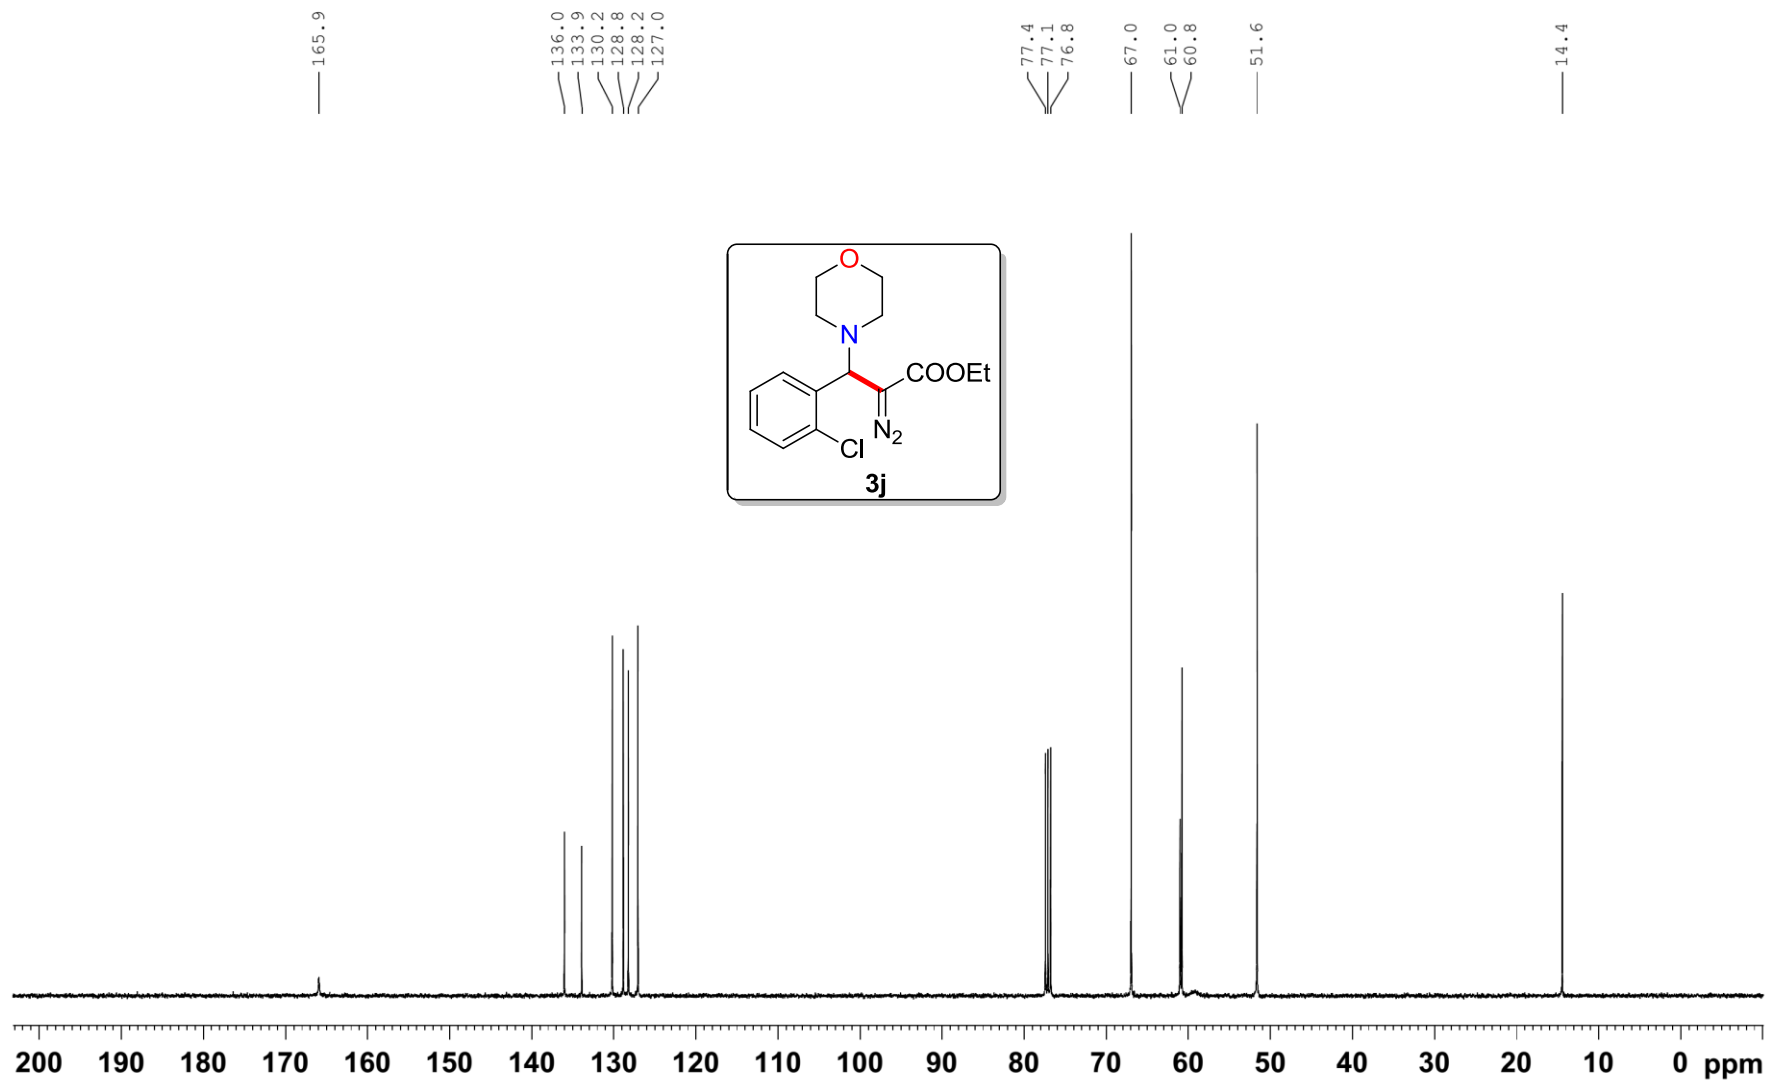

LJW-X15Z29-8-HNMR CDC13

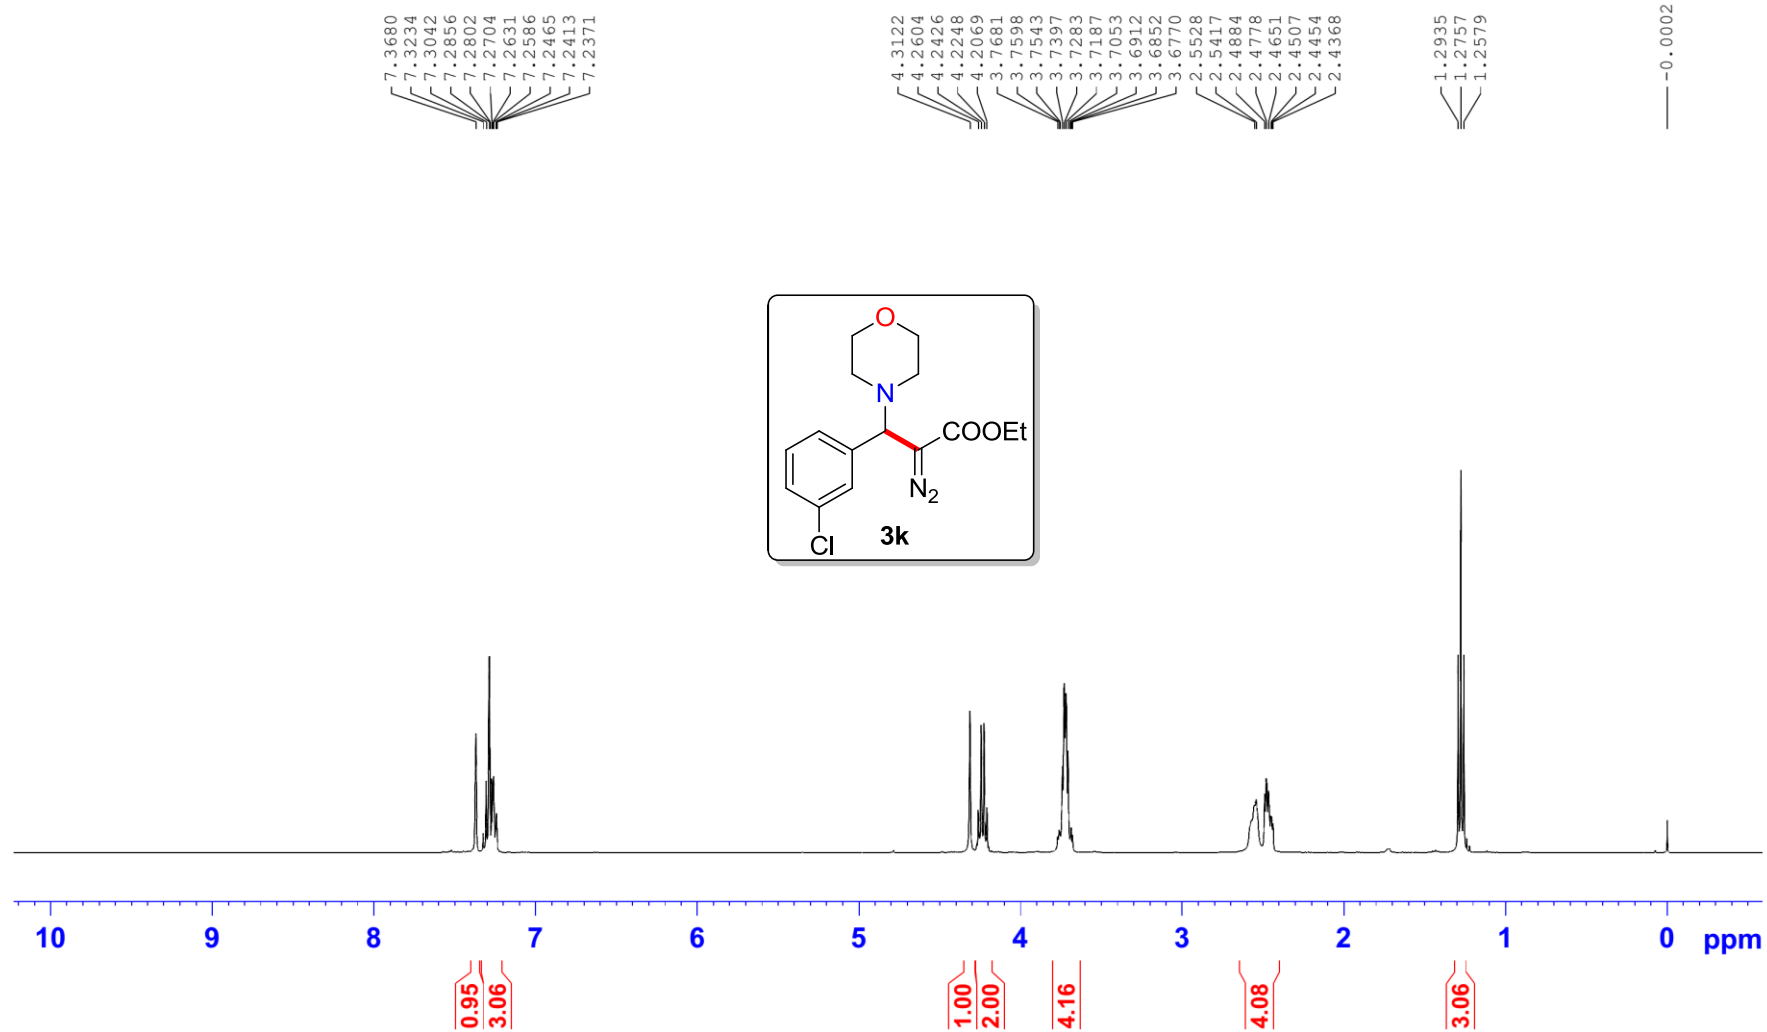



LJW-X15Z30-5-CNMR CDC13

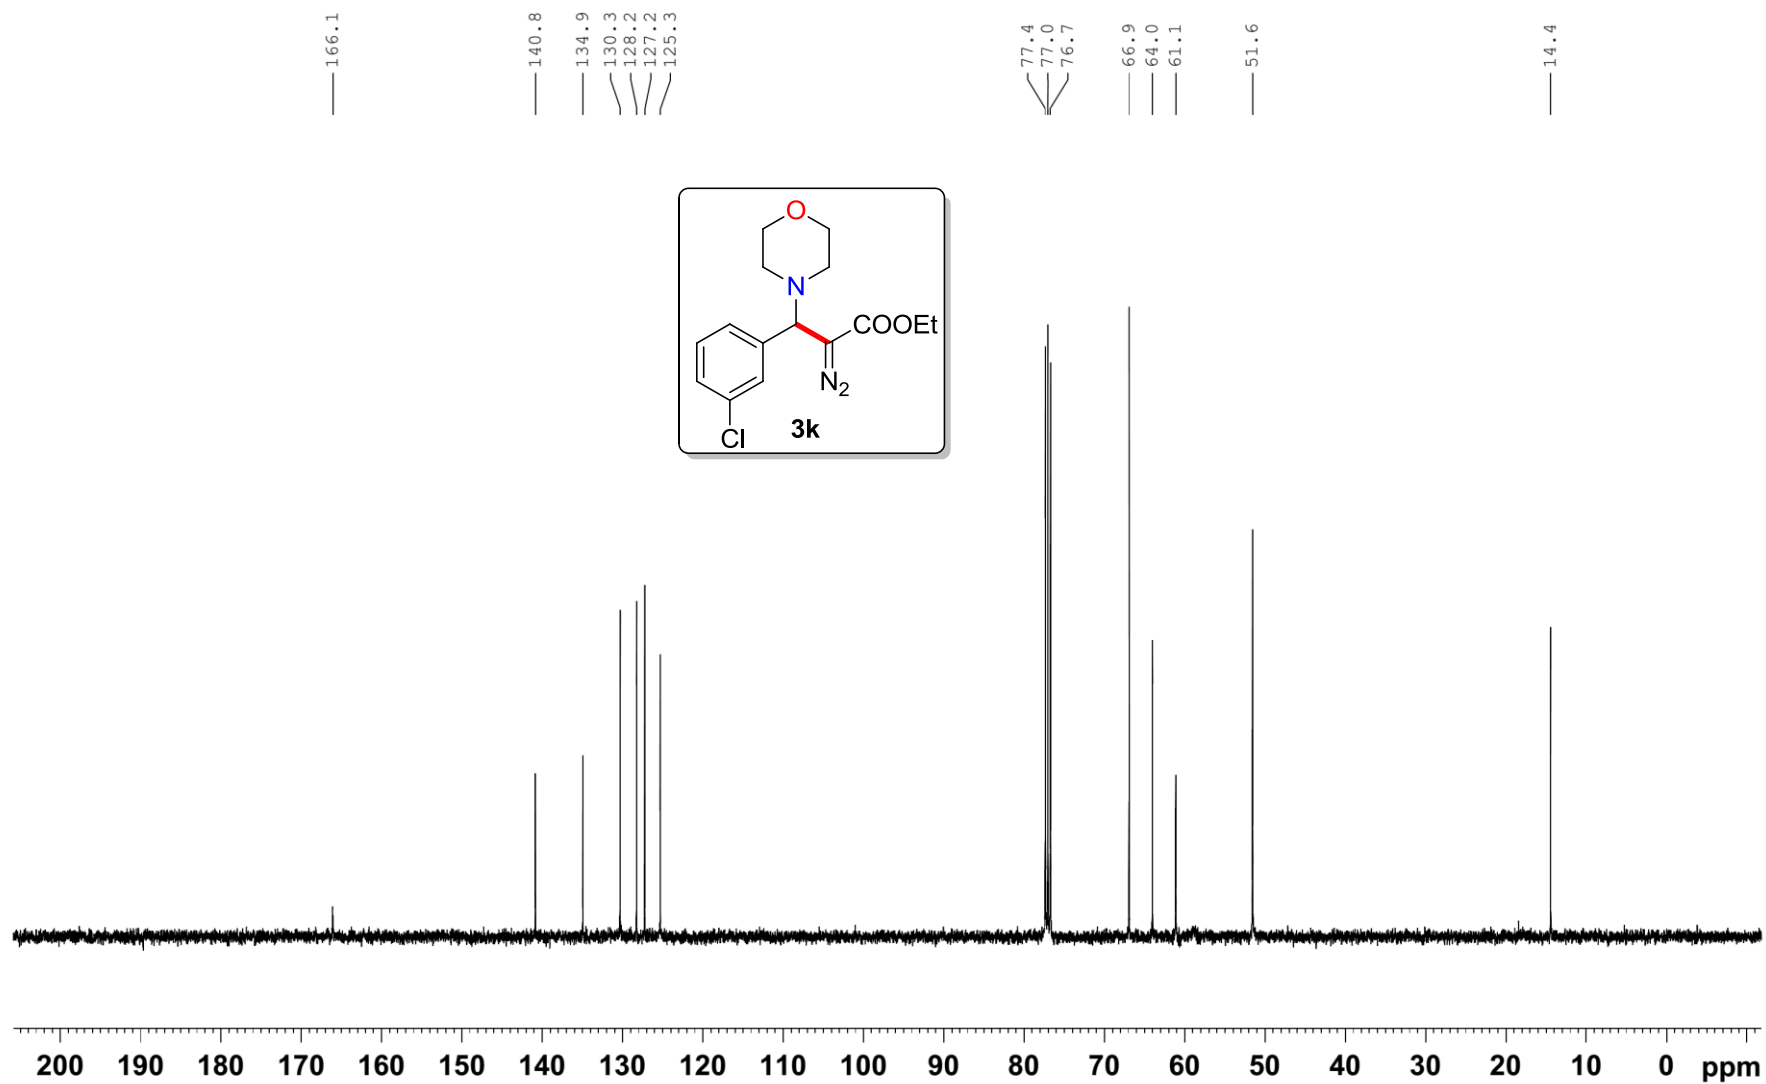

LJW-X15Z29-9-HNMR CDCl<sub>3</sub>

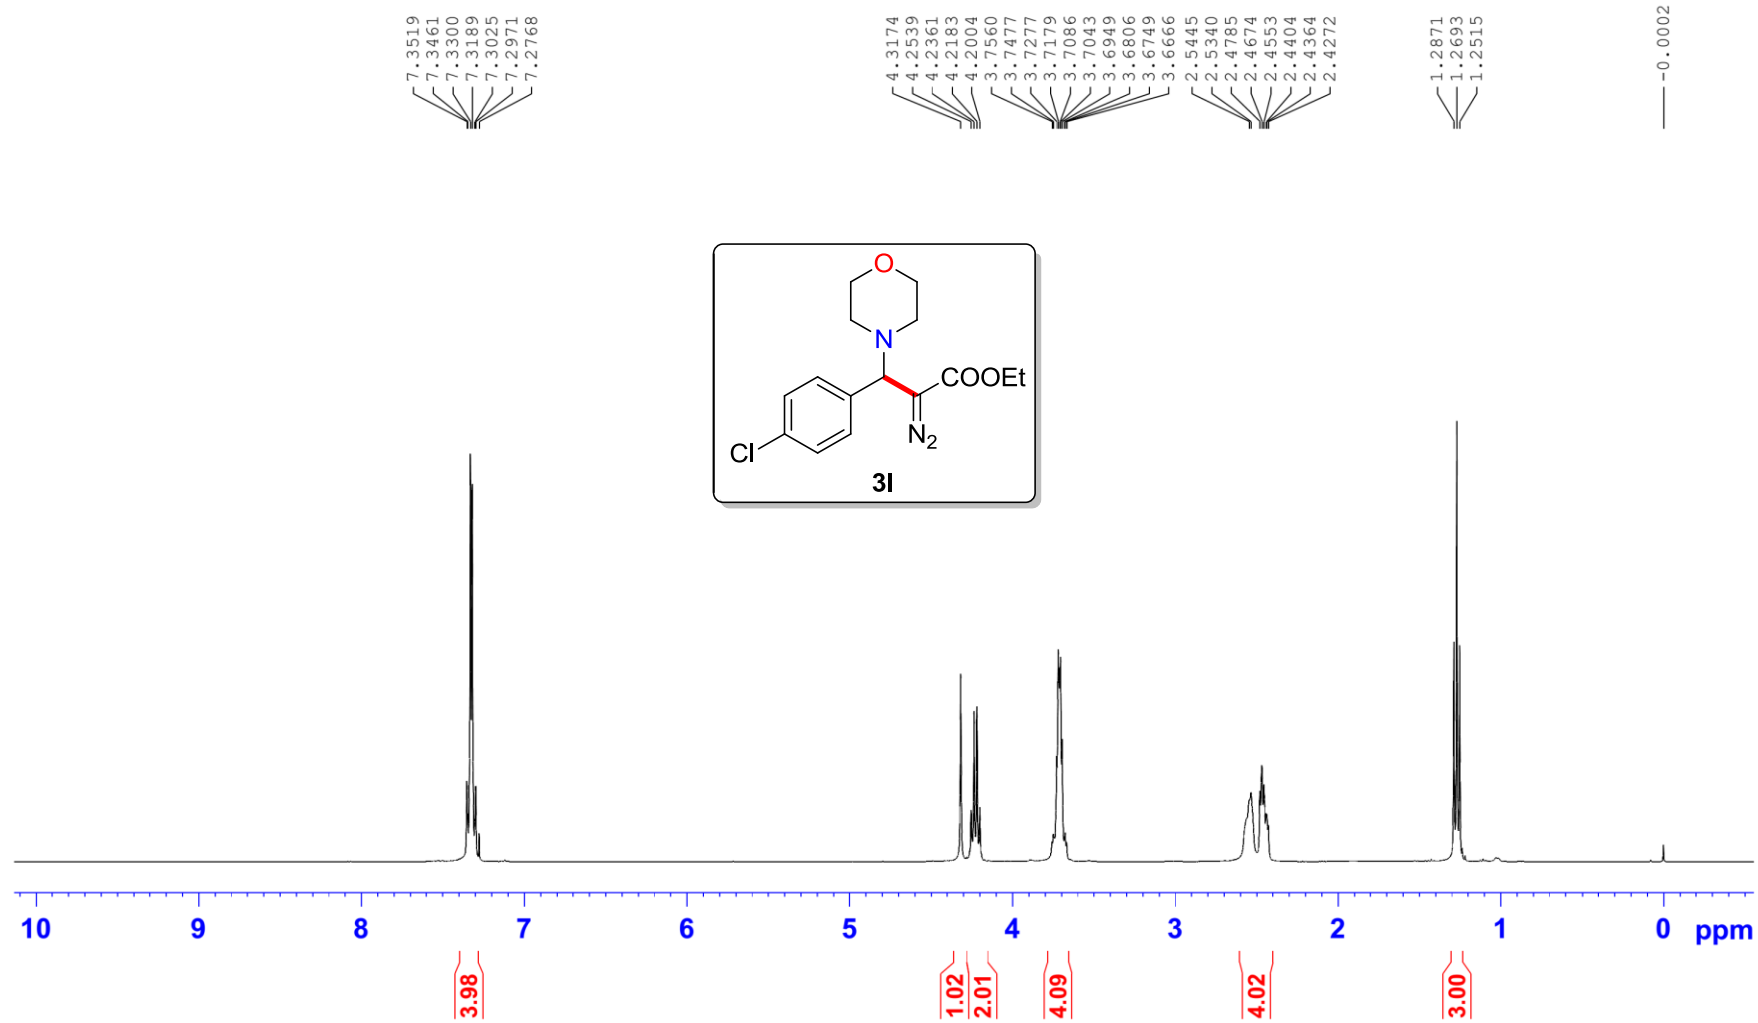

LJW-X15Z30-6-CNMR CDCl<sub>3</sub>

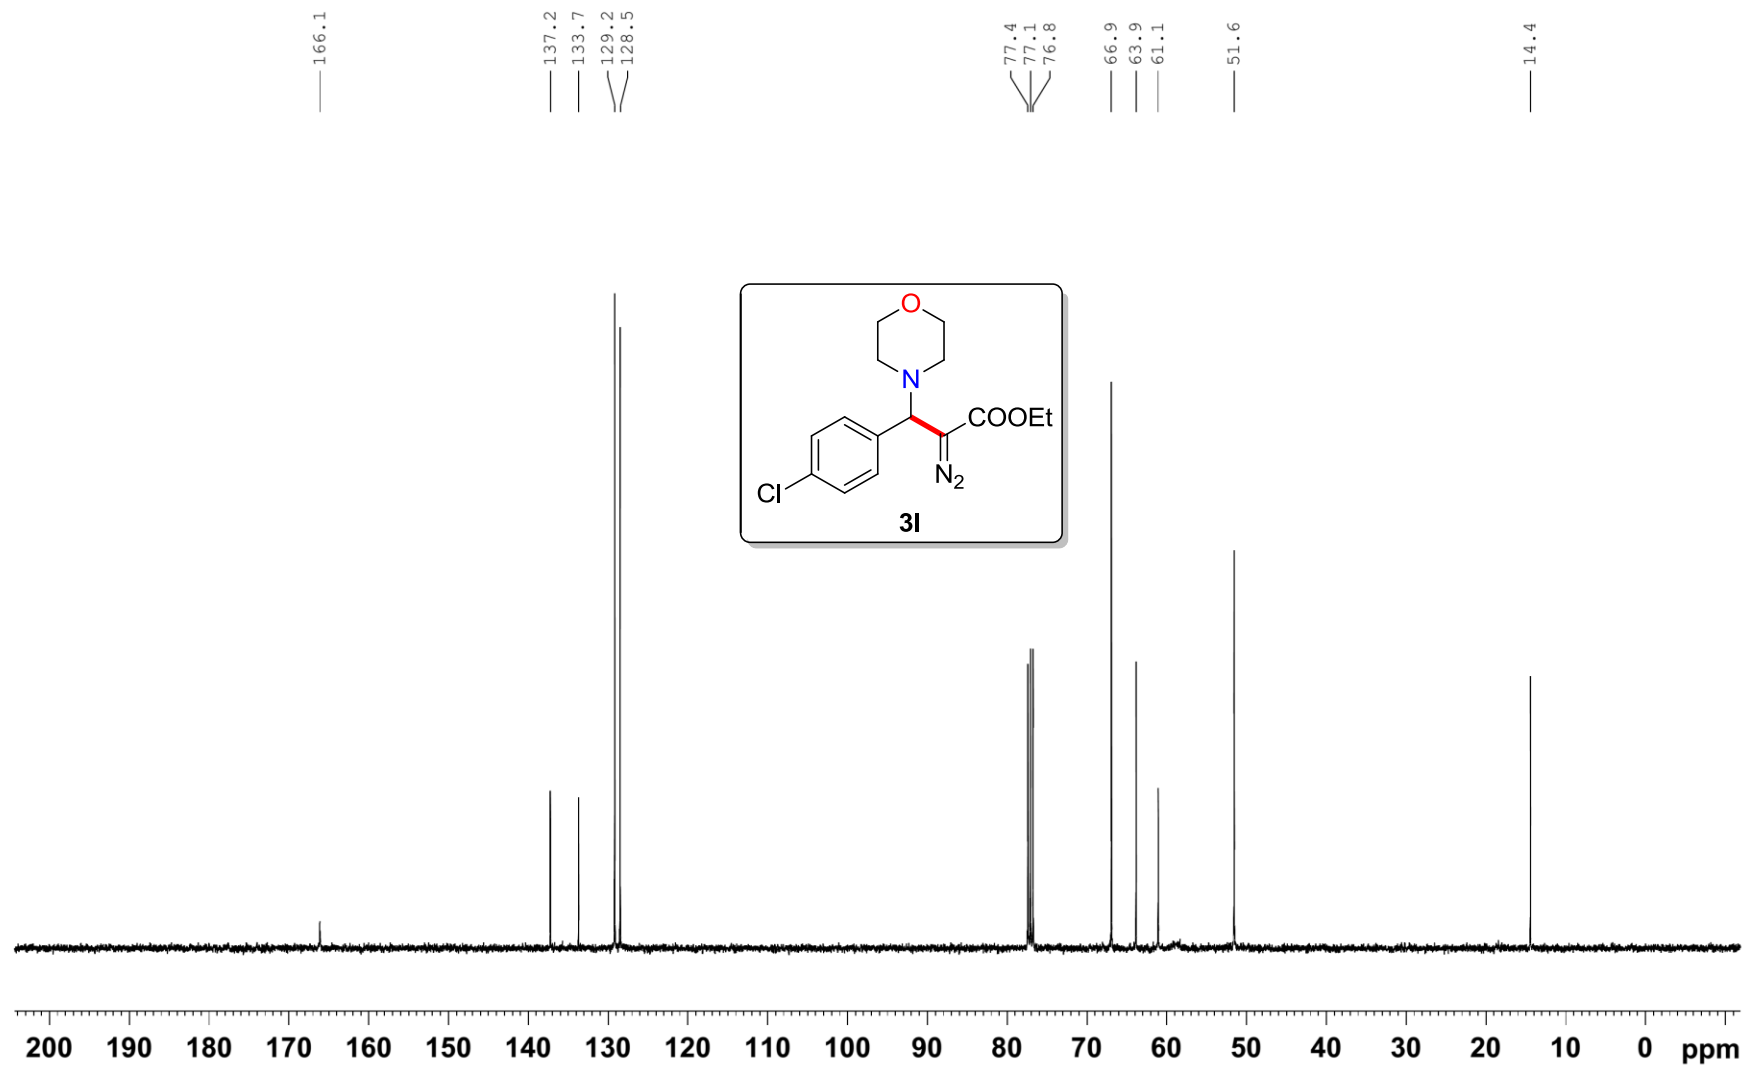

LJW-X160106-4-HNMR CDCl<sub>3</sub>

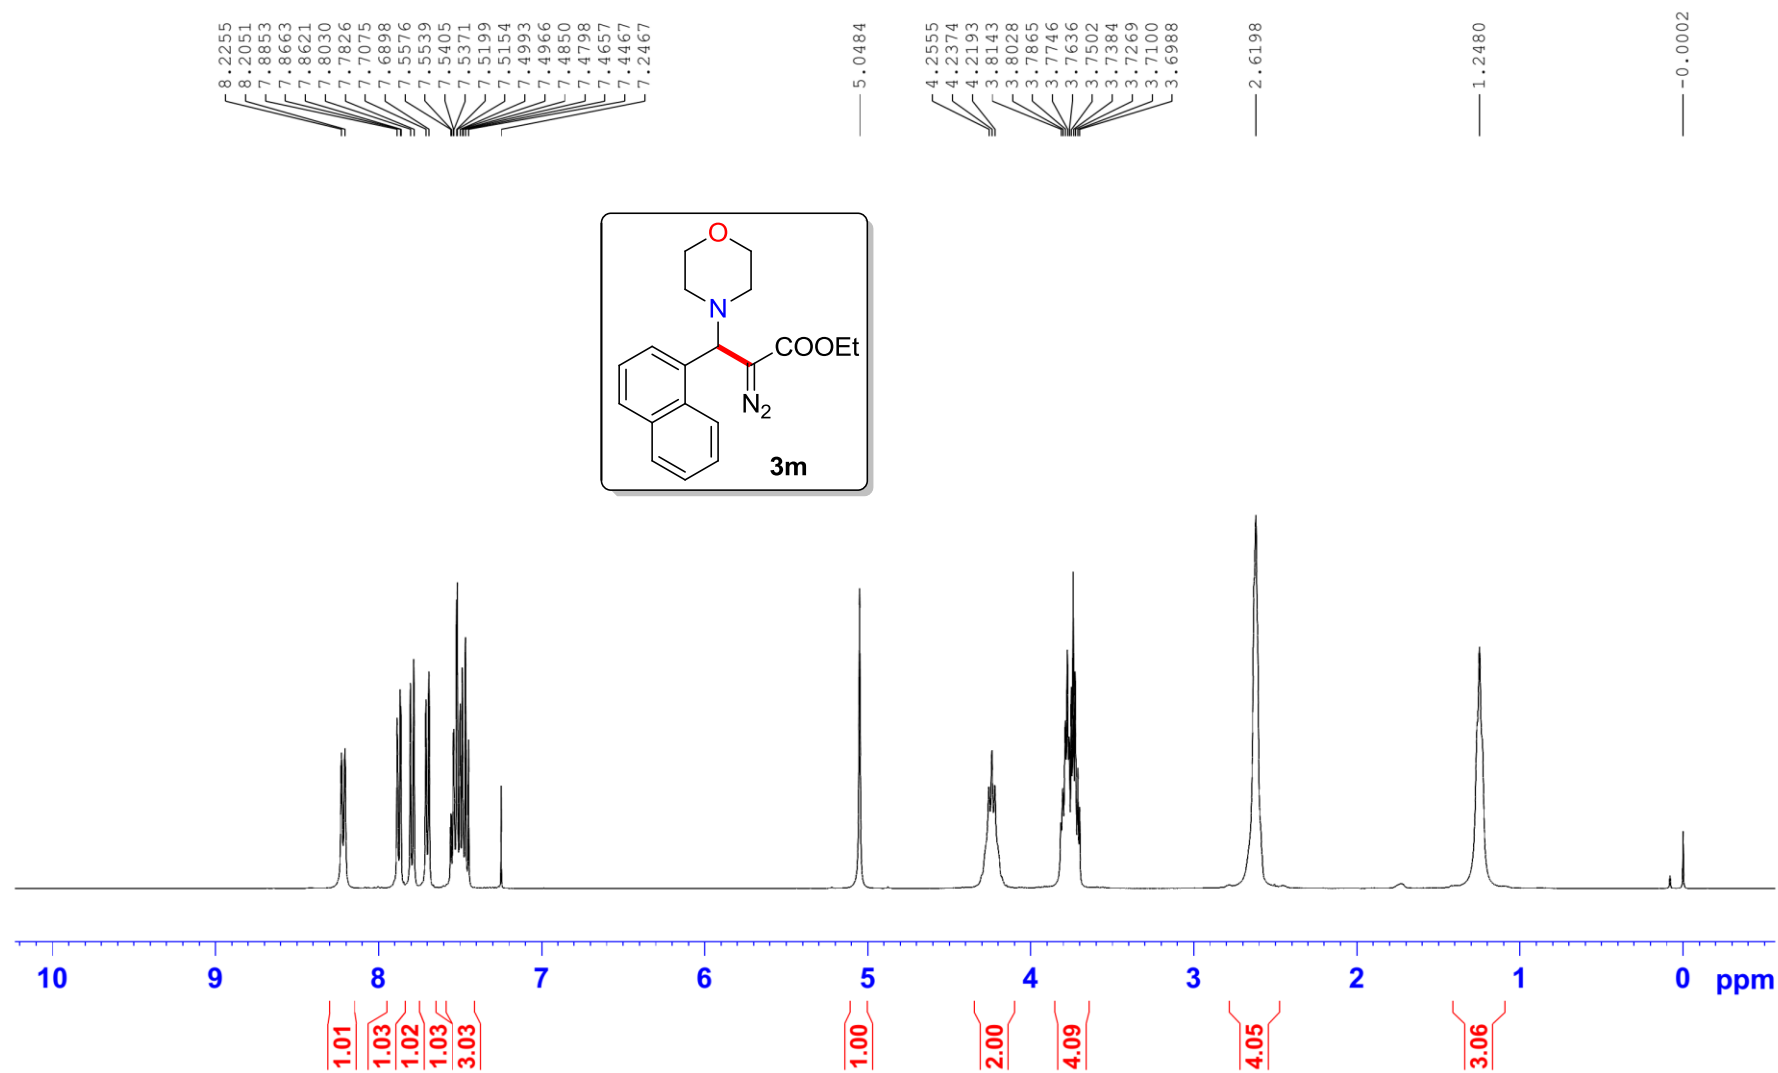

LJW-X160106-4-CNMR CDC13

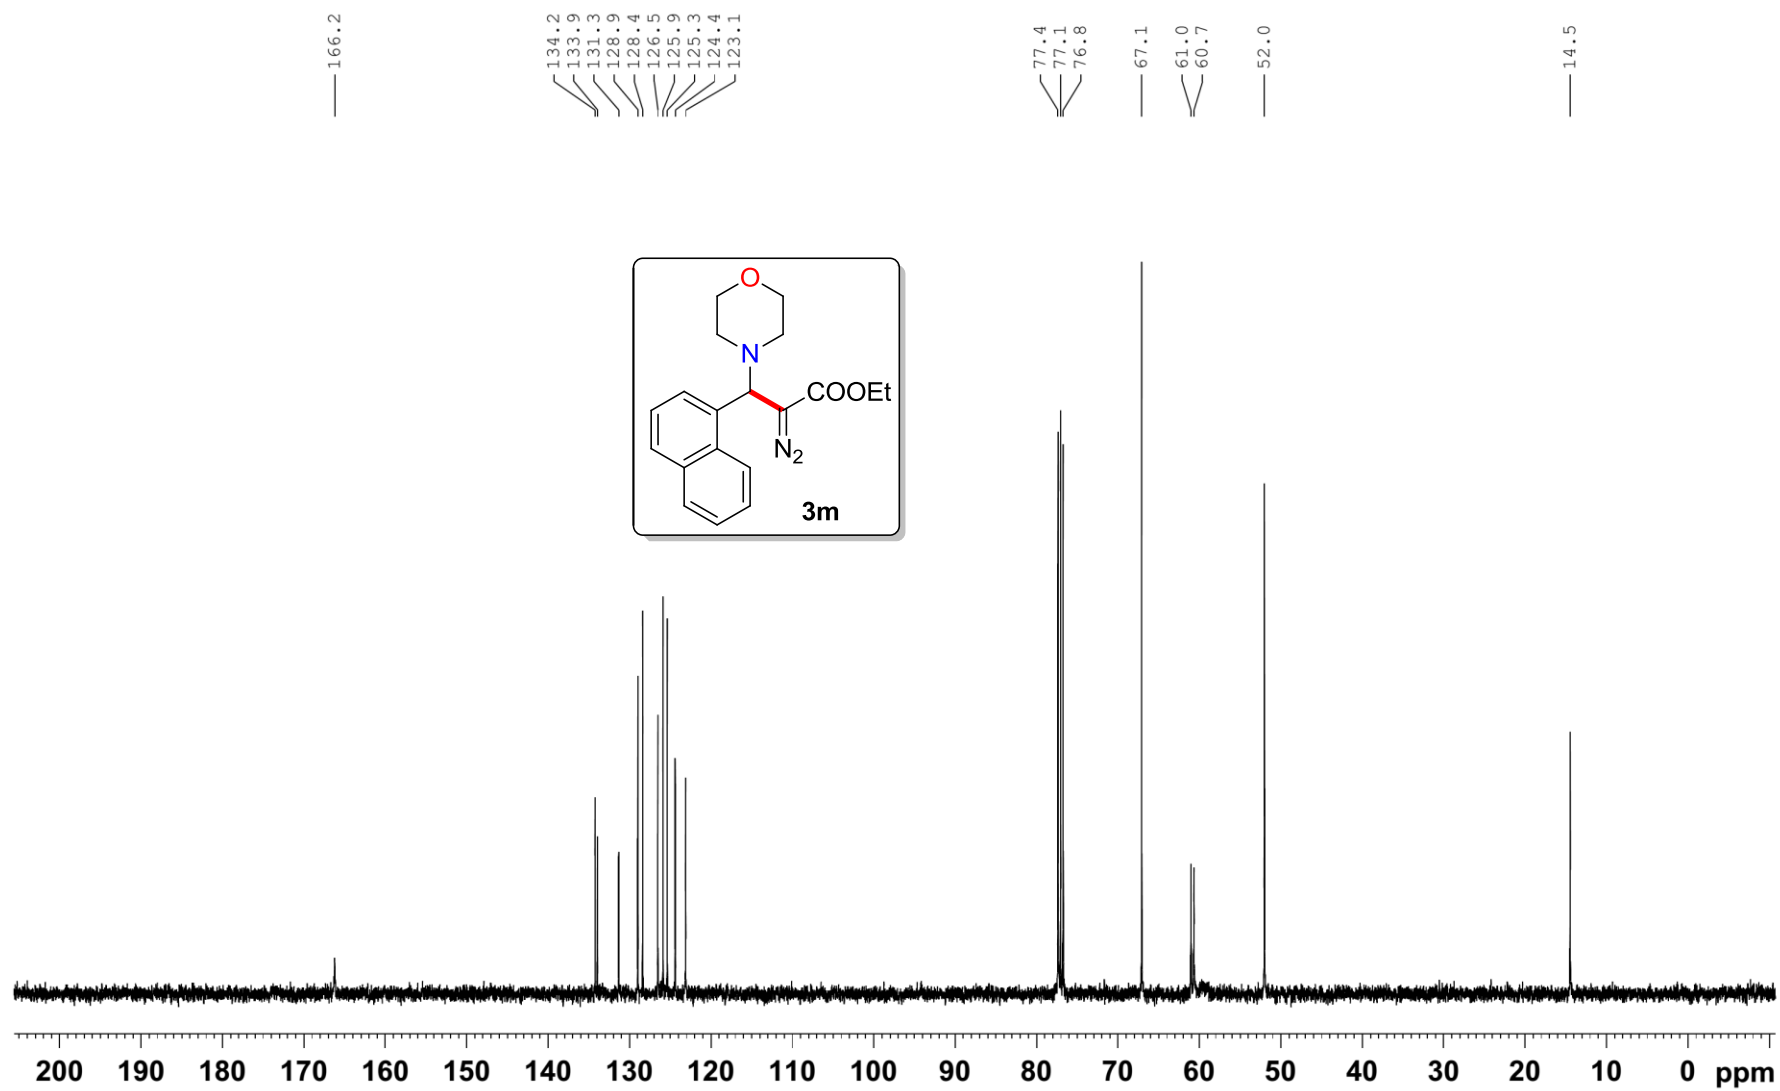

LJW-X160510-1-HNMR (2)

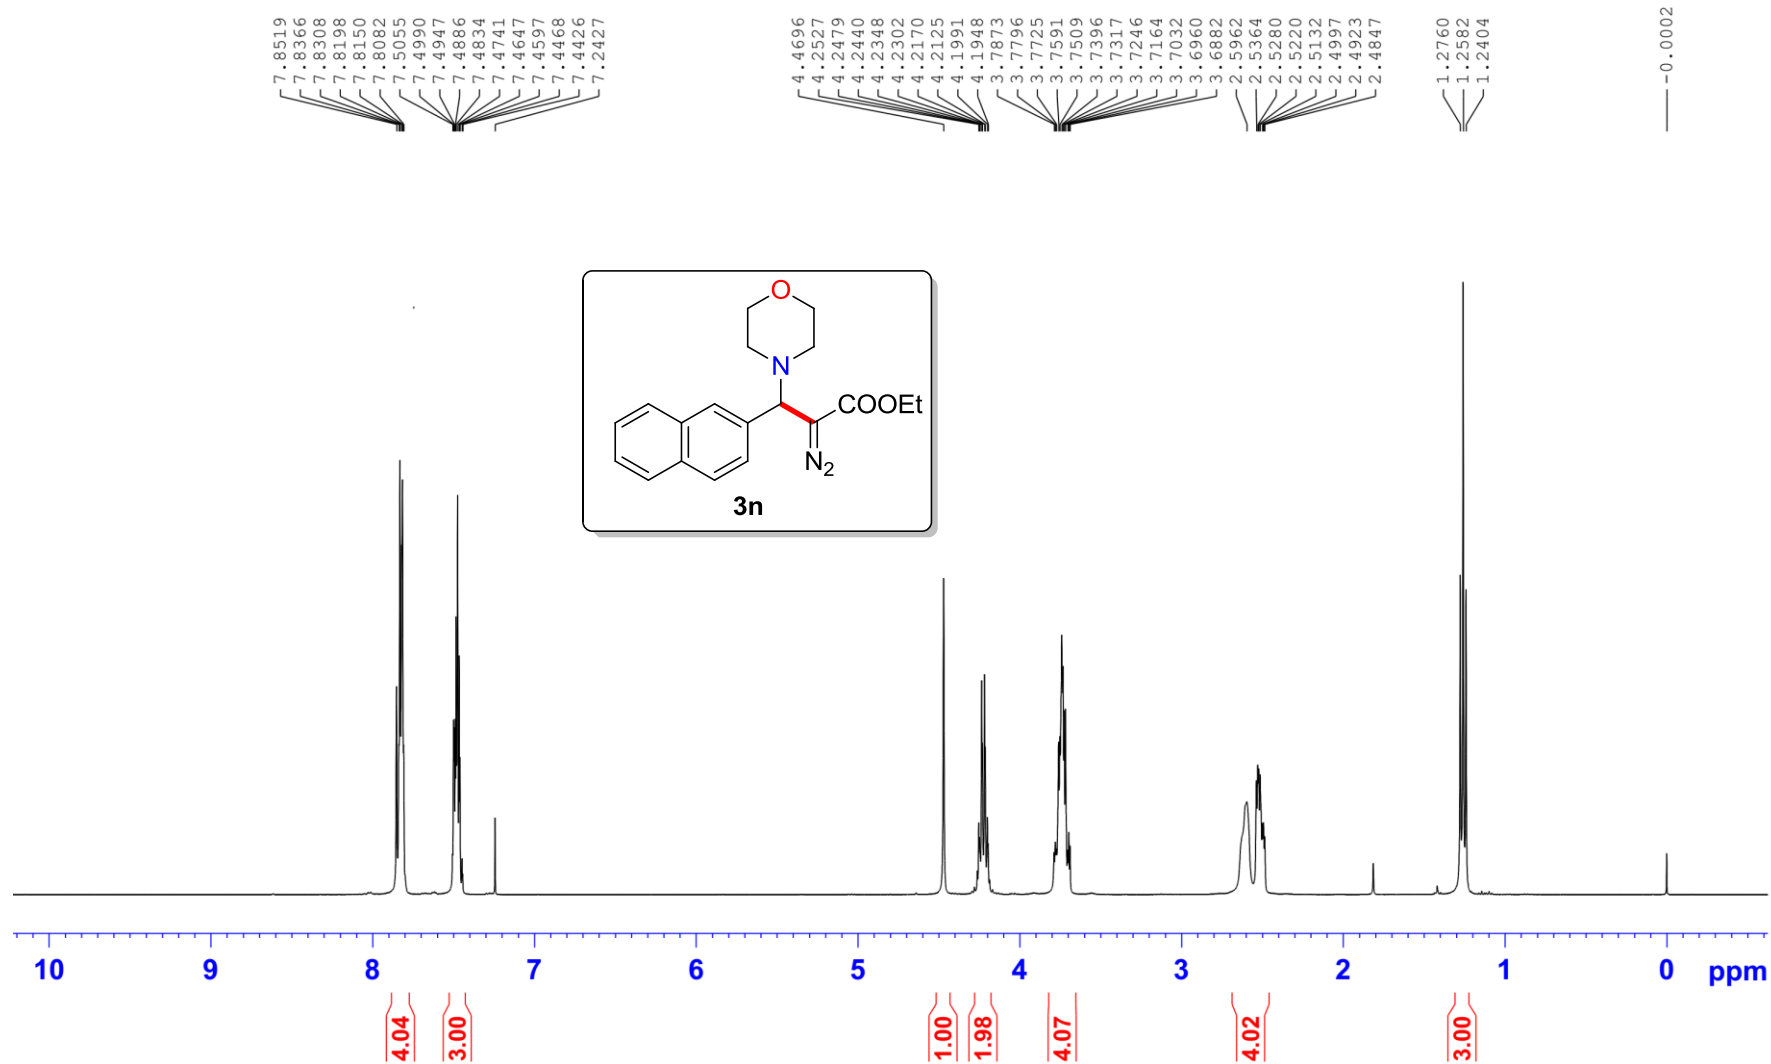

LJW-X160510-1-CNMR (3)

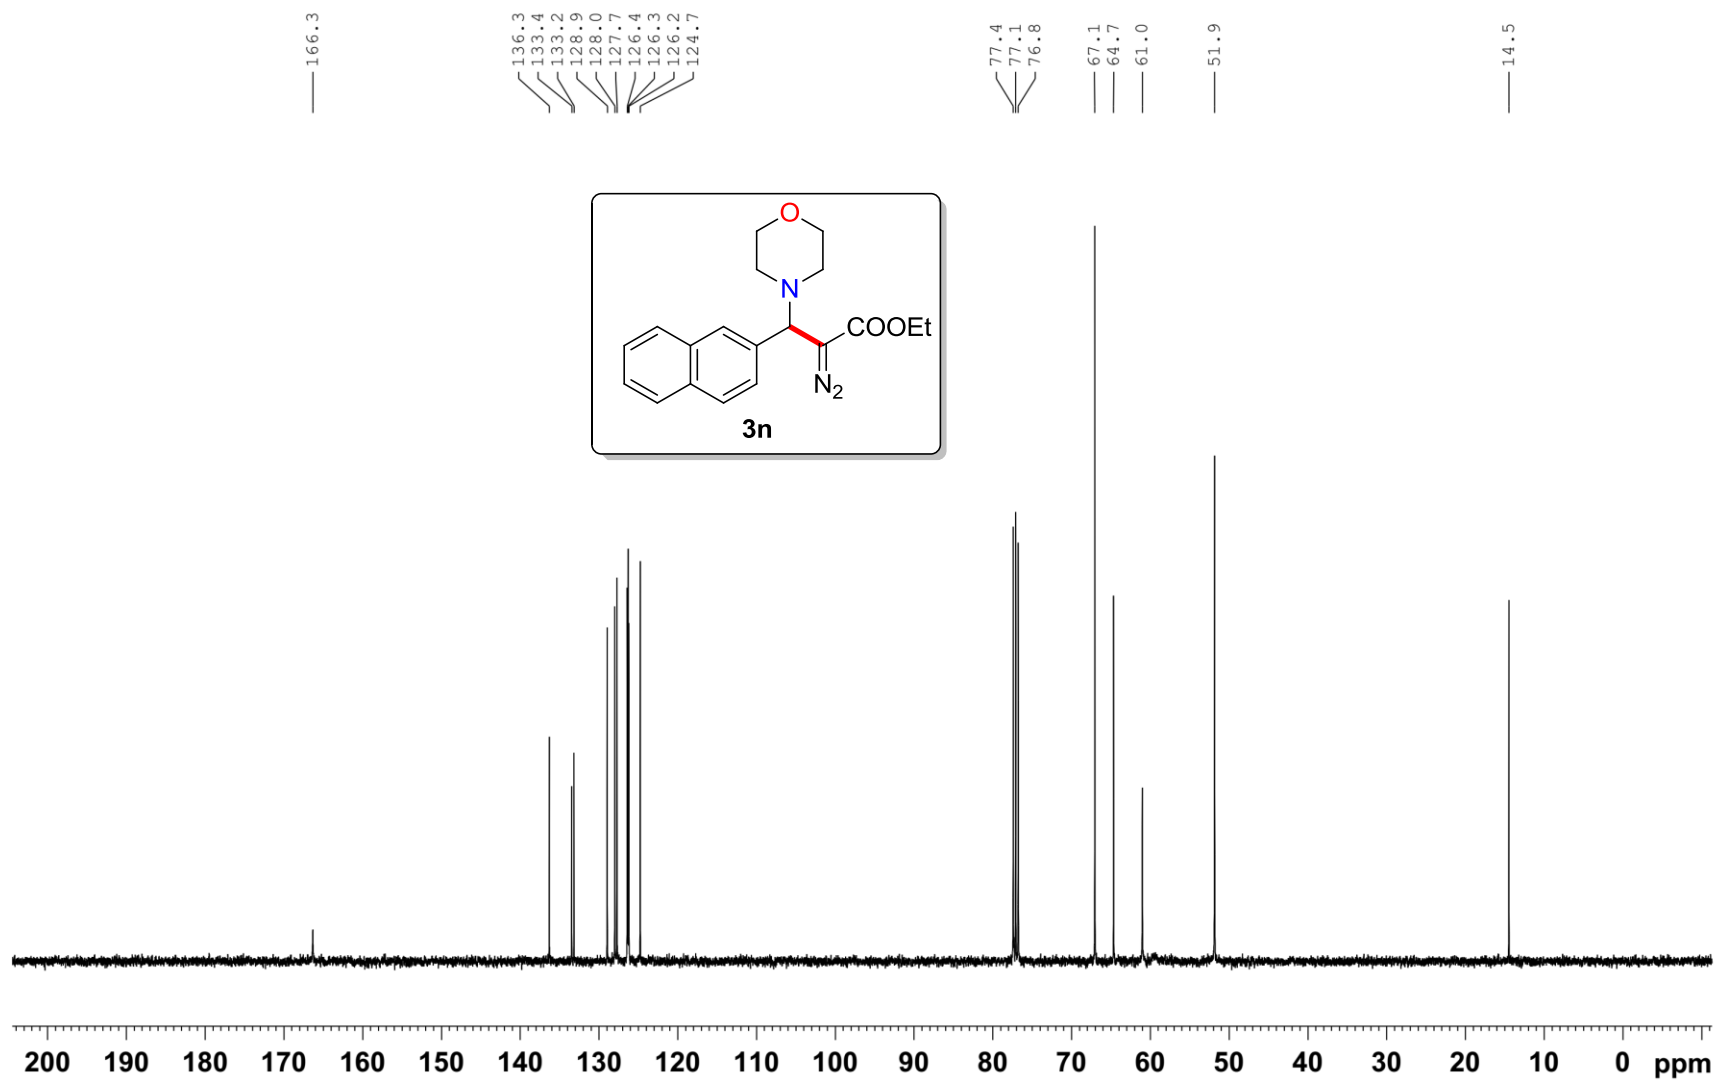

LJW-X160113-3-HNMR CDCl<sub>3</sub>

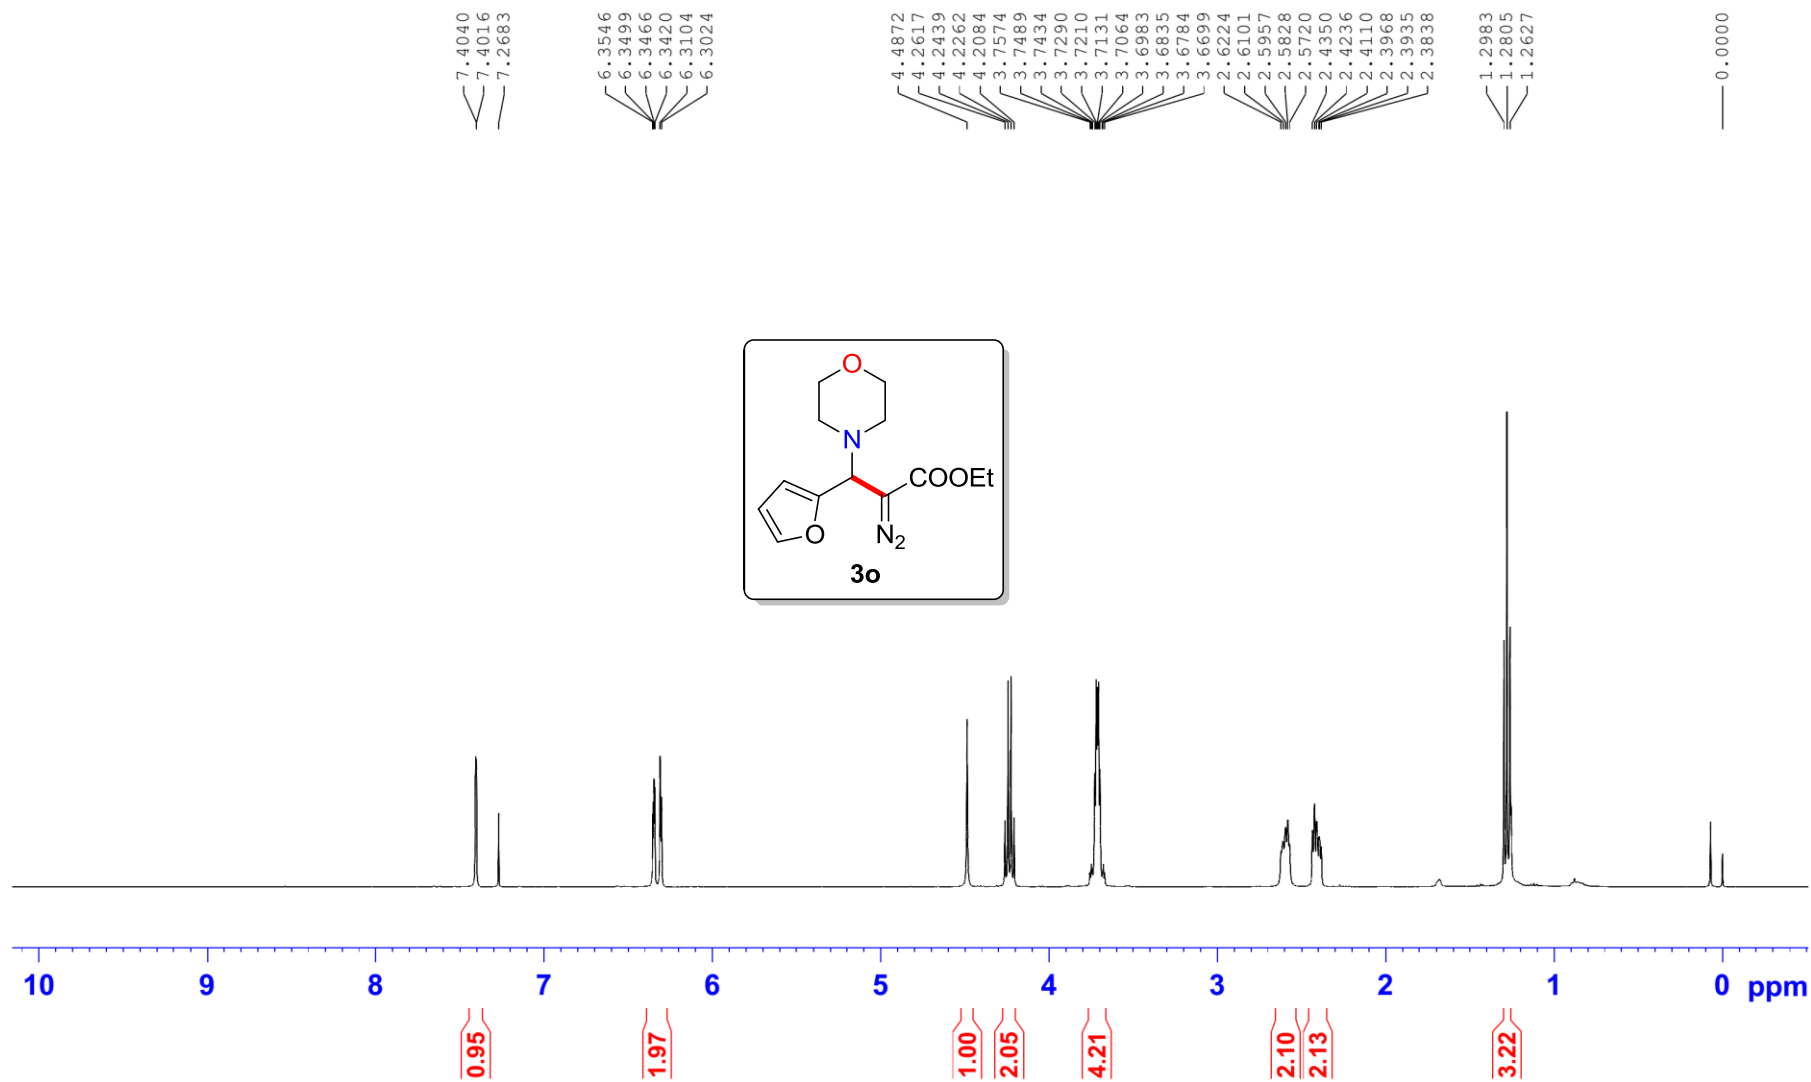



LJW-X160113-3-CNMR CDCl<sub>3</sub>

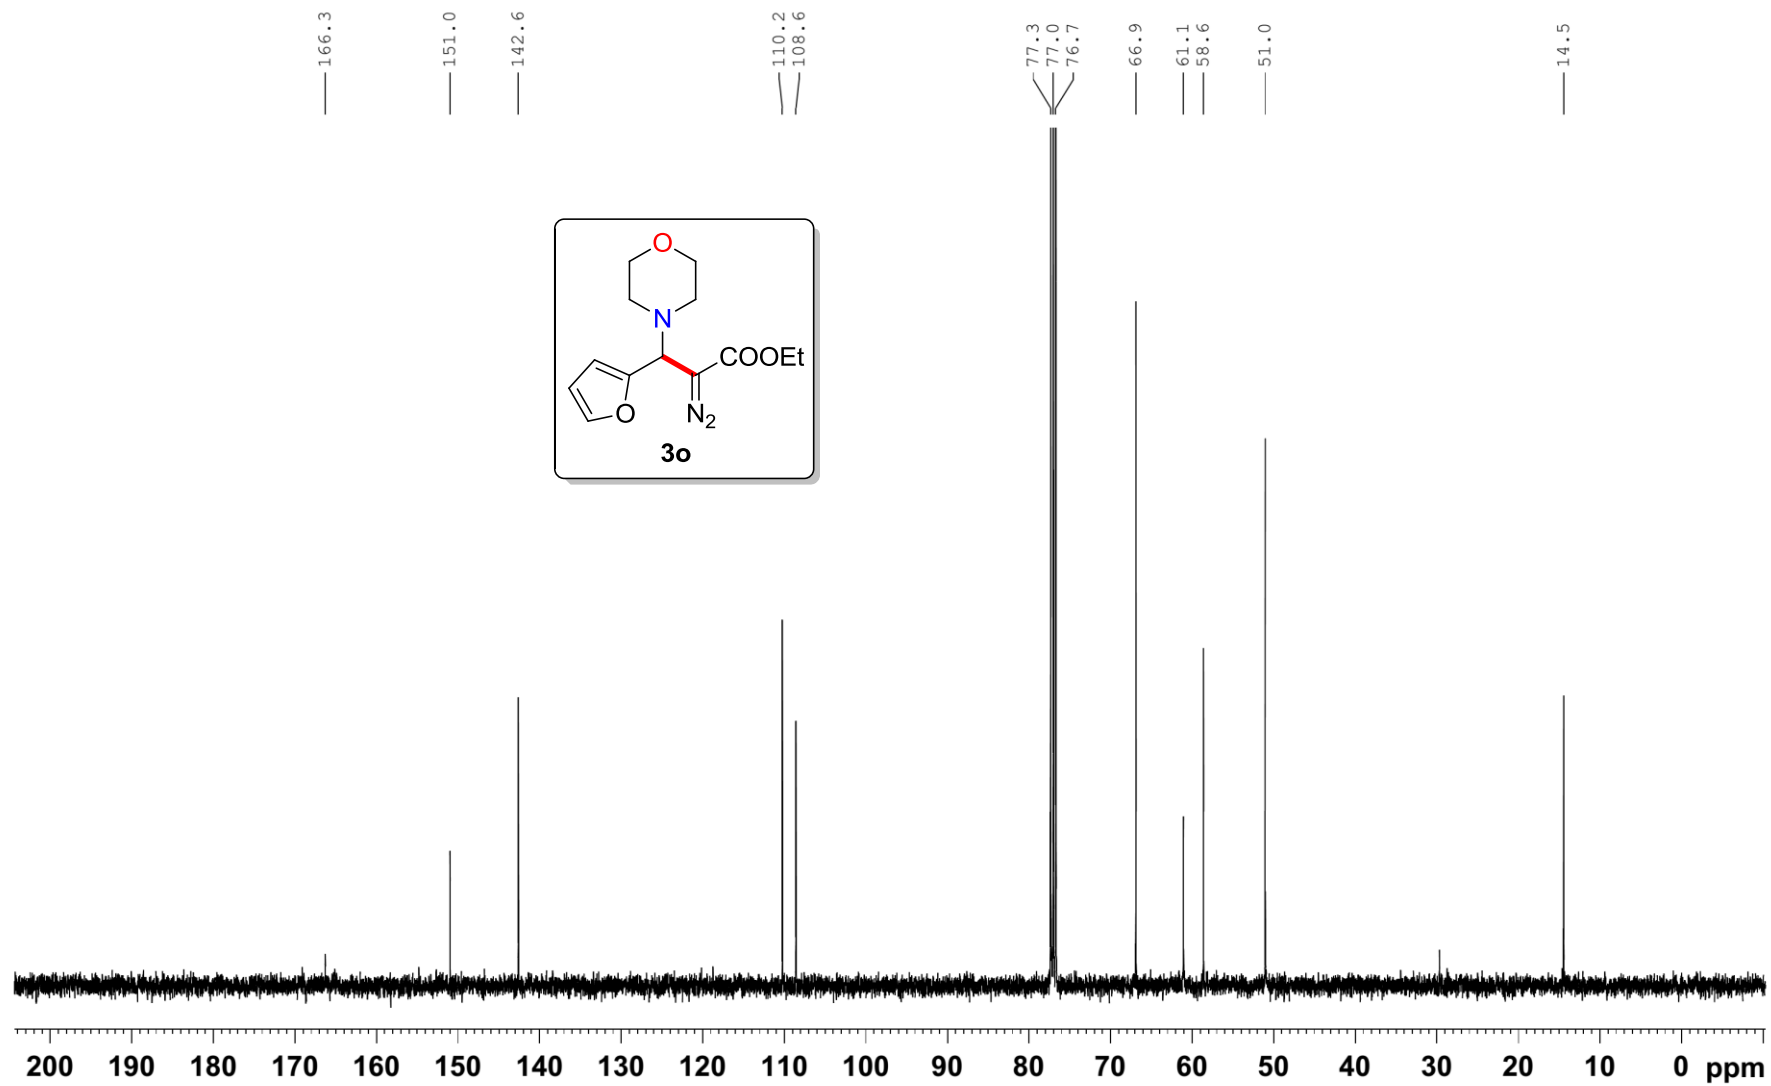

LJW-X160510-2-HNMR (1)

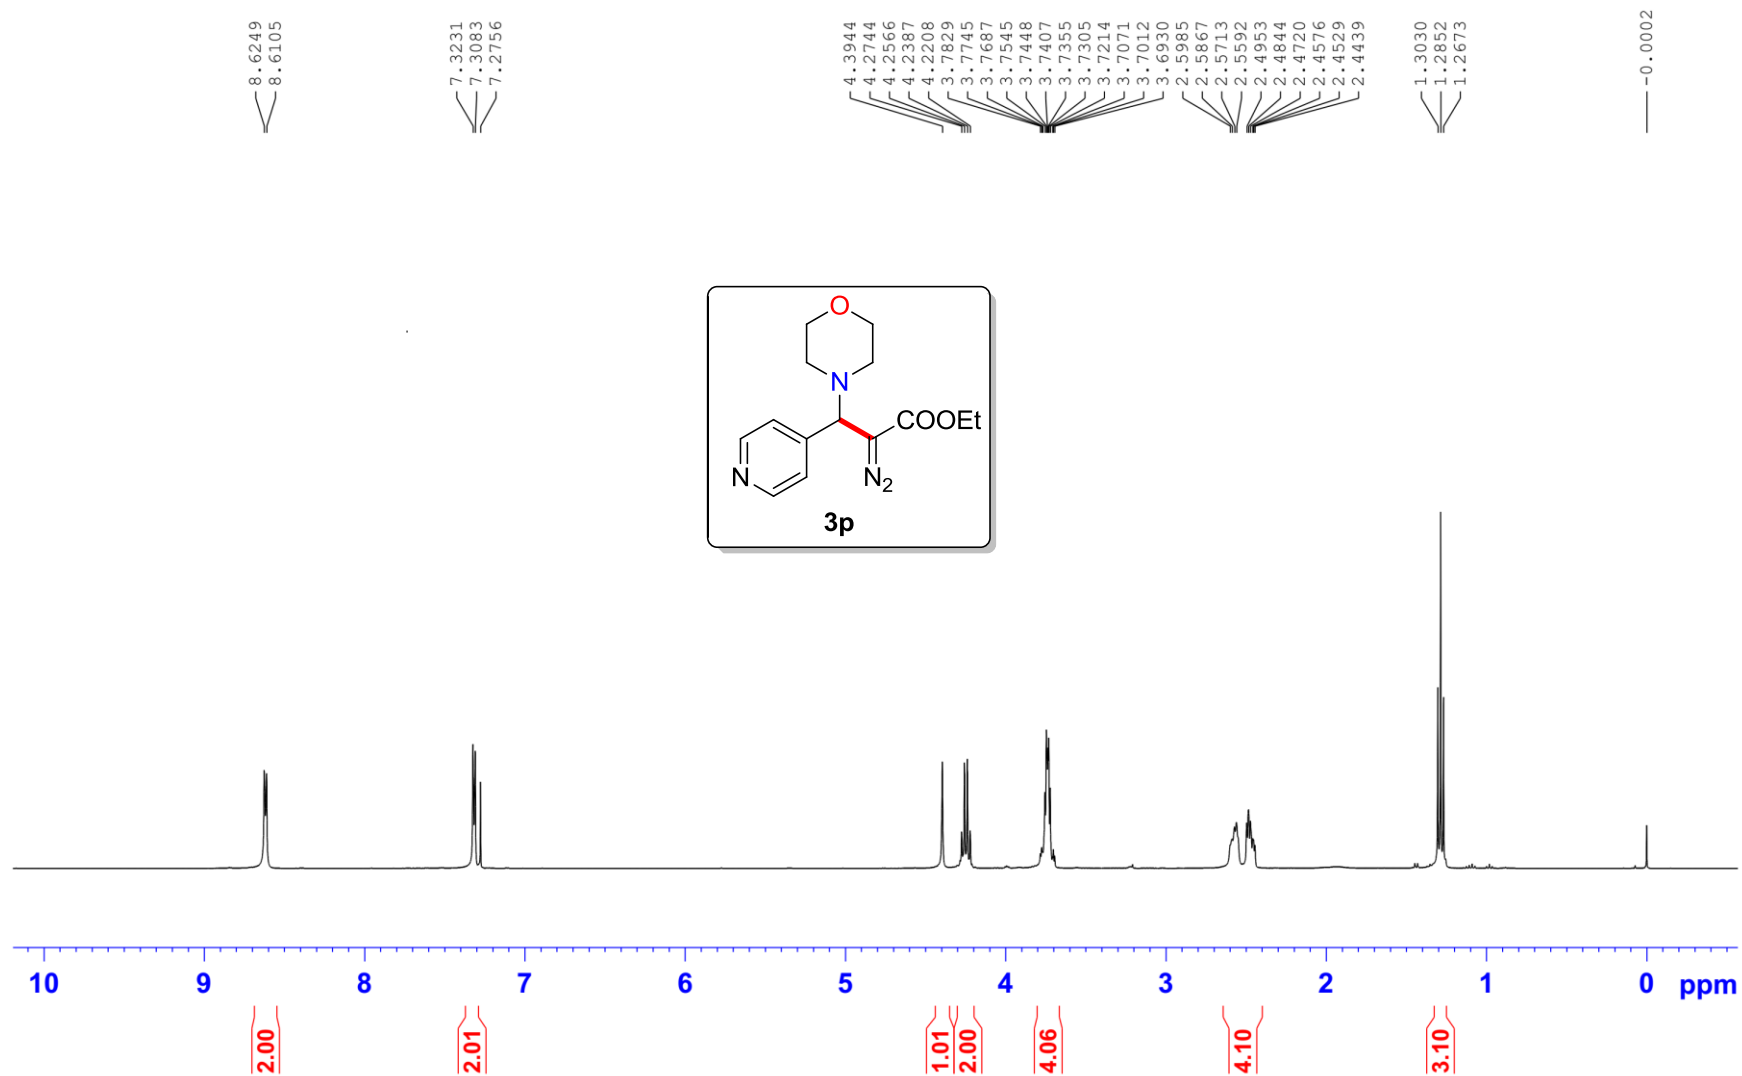

LJW-X160510-2-CNMR (13)

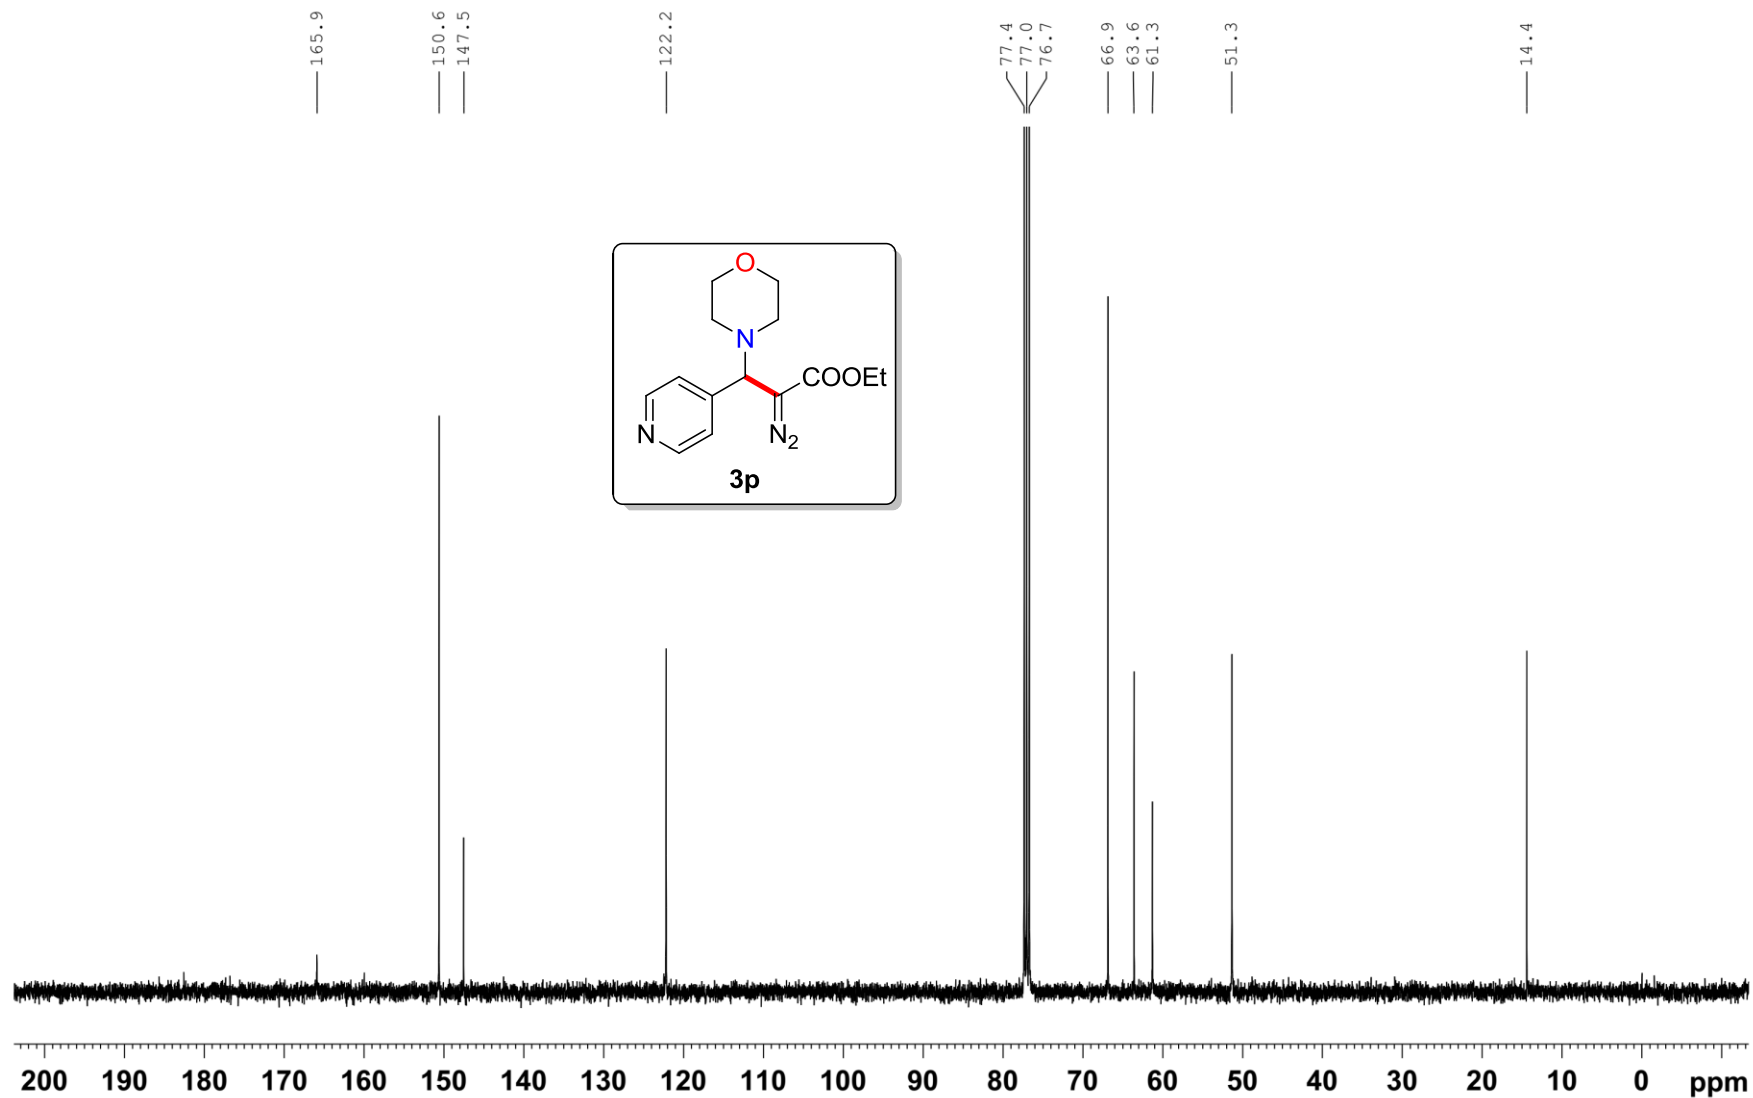

LJW-X160920-4-HNMR

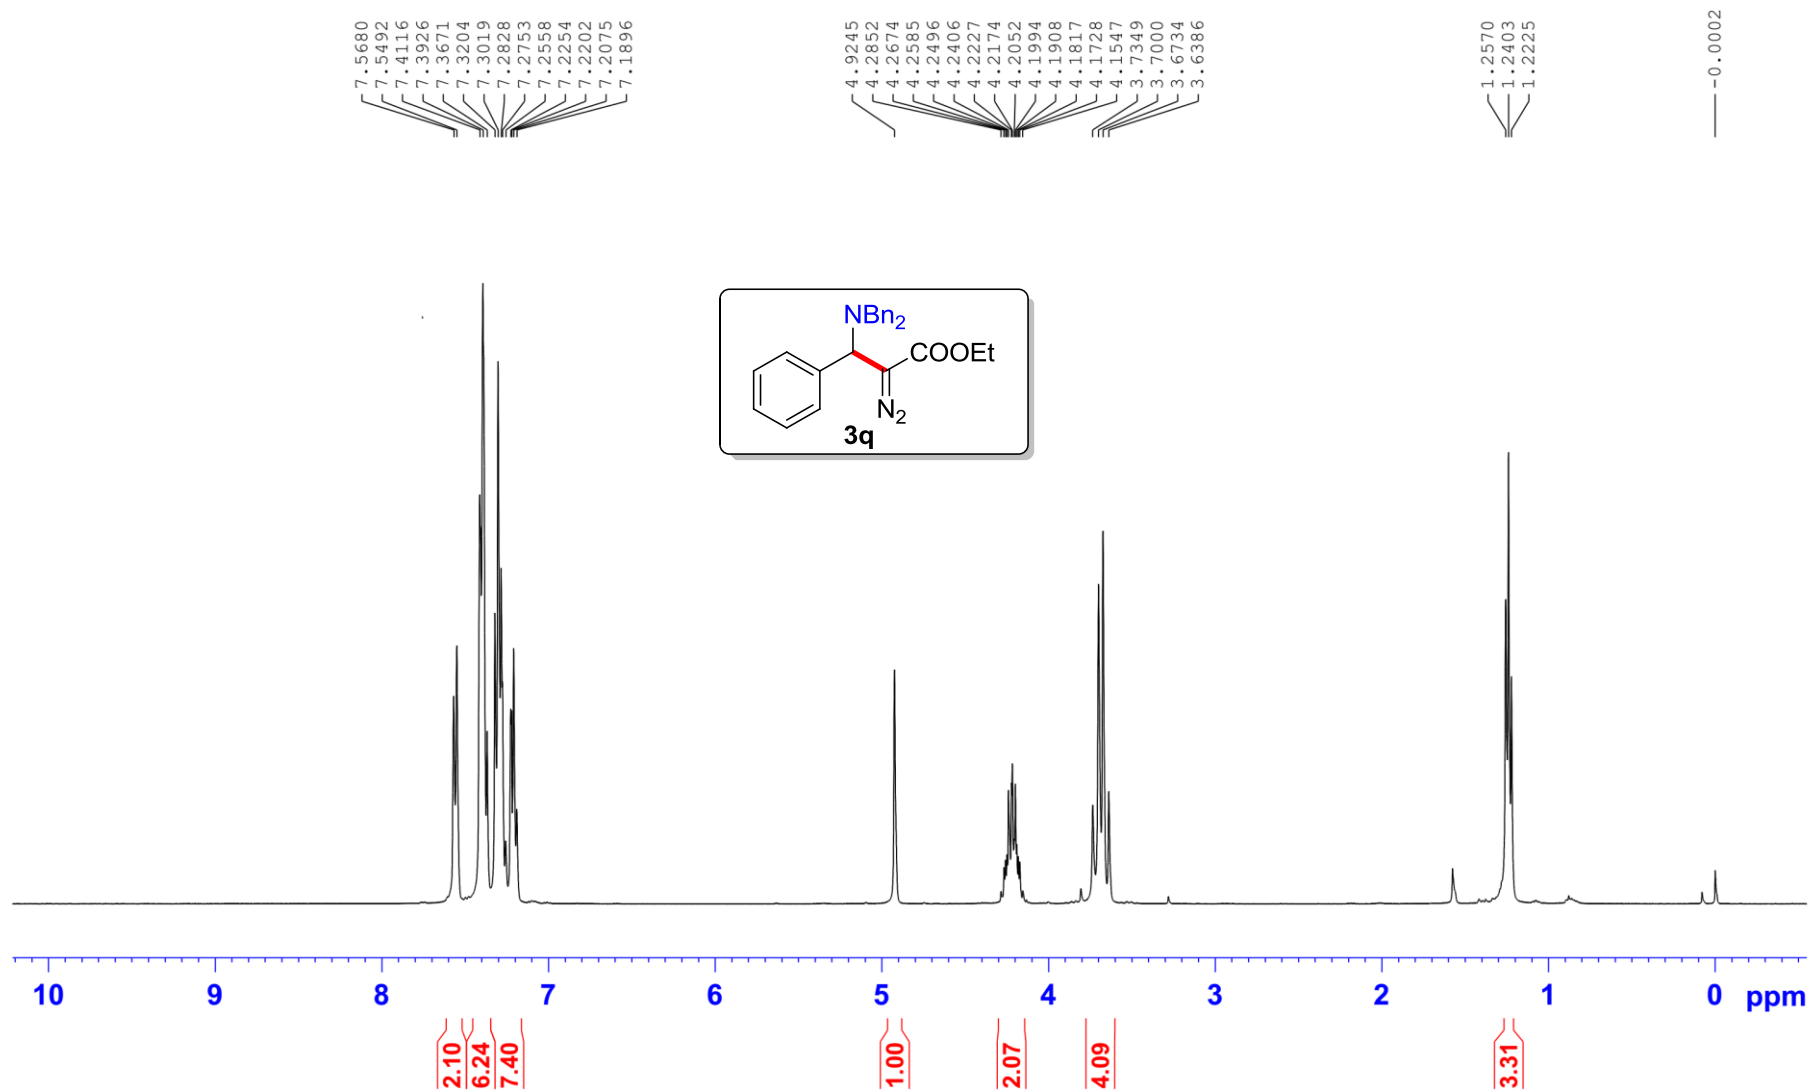

LJW-X160920-4-CNMR

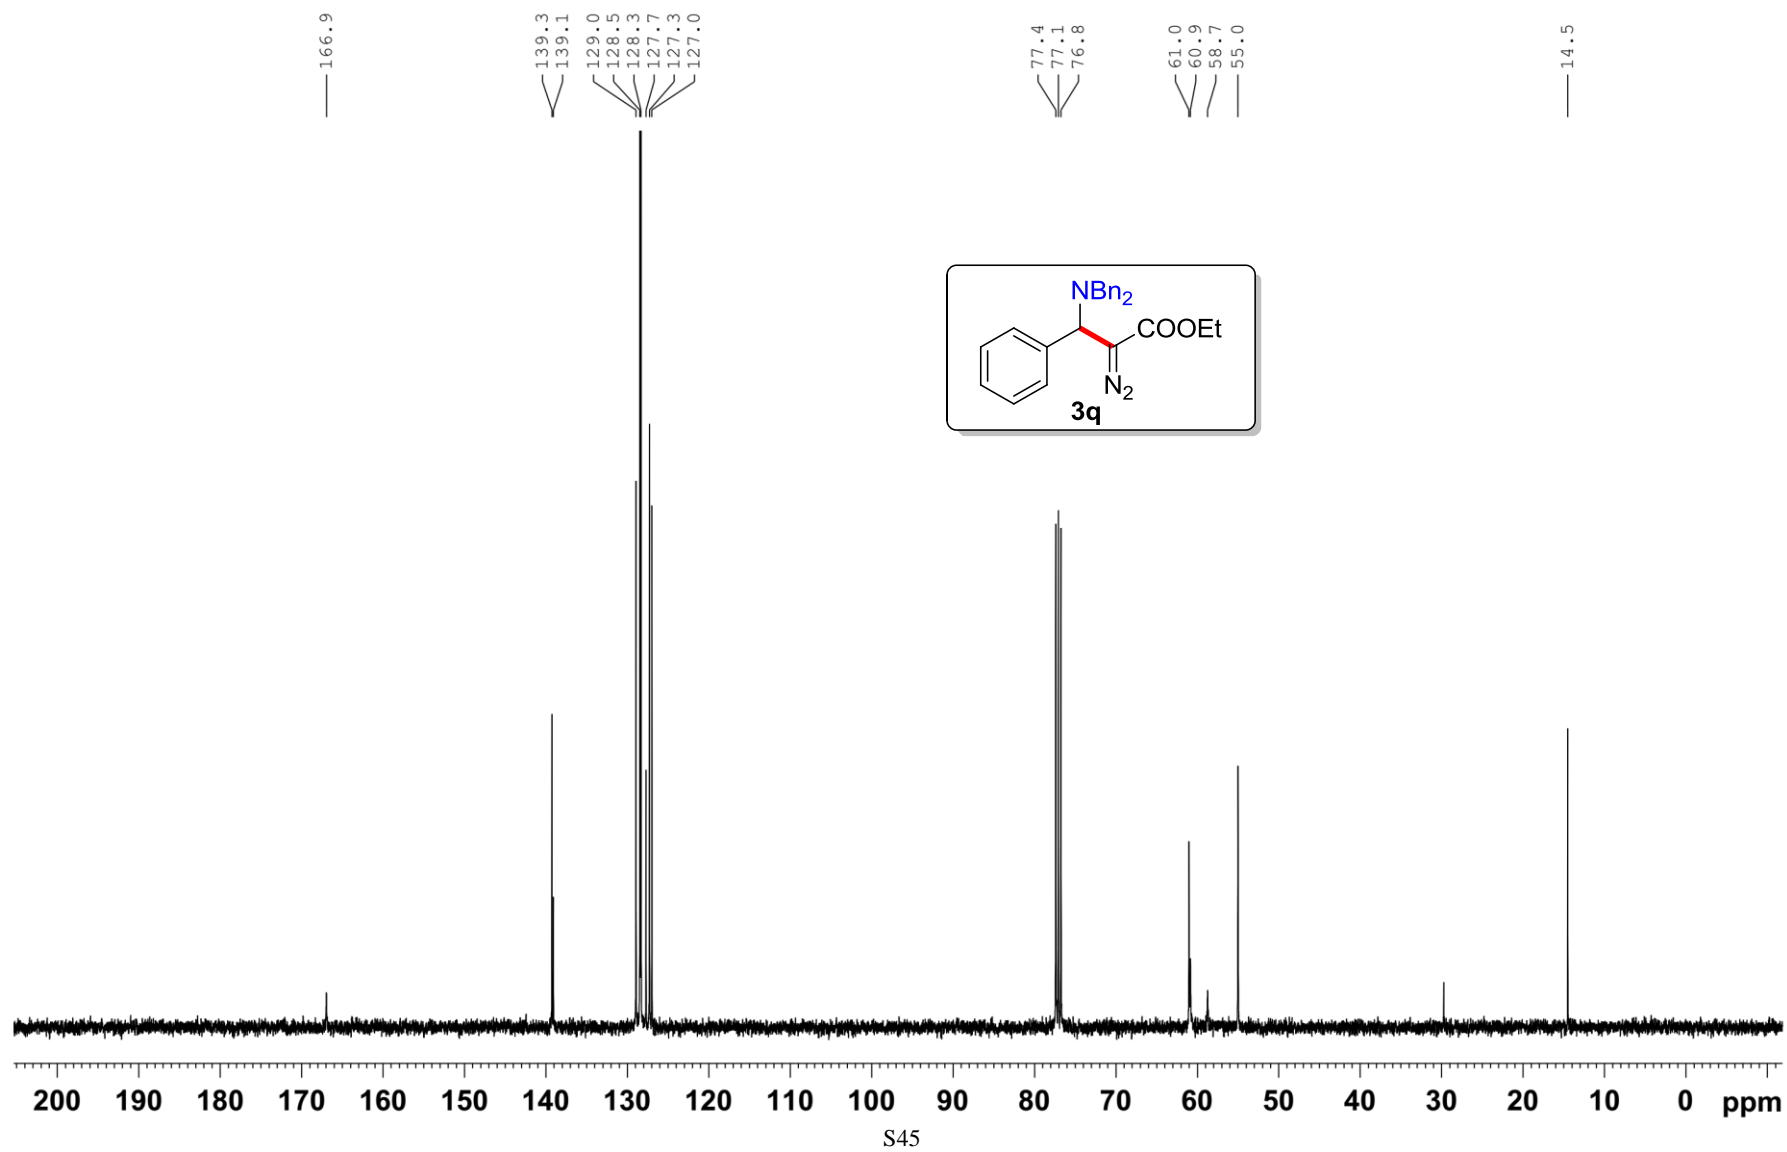

LJW-X16X15-3-HNMR

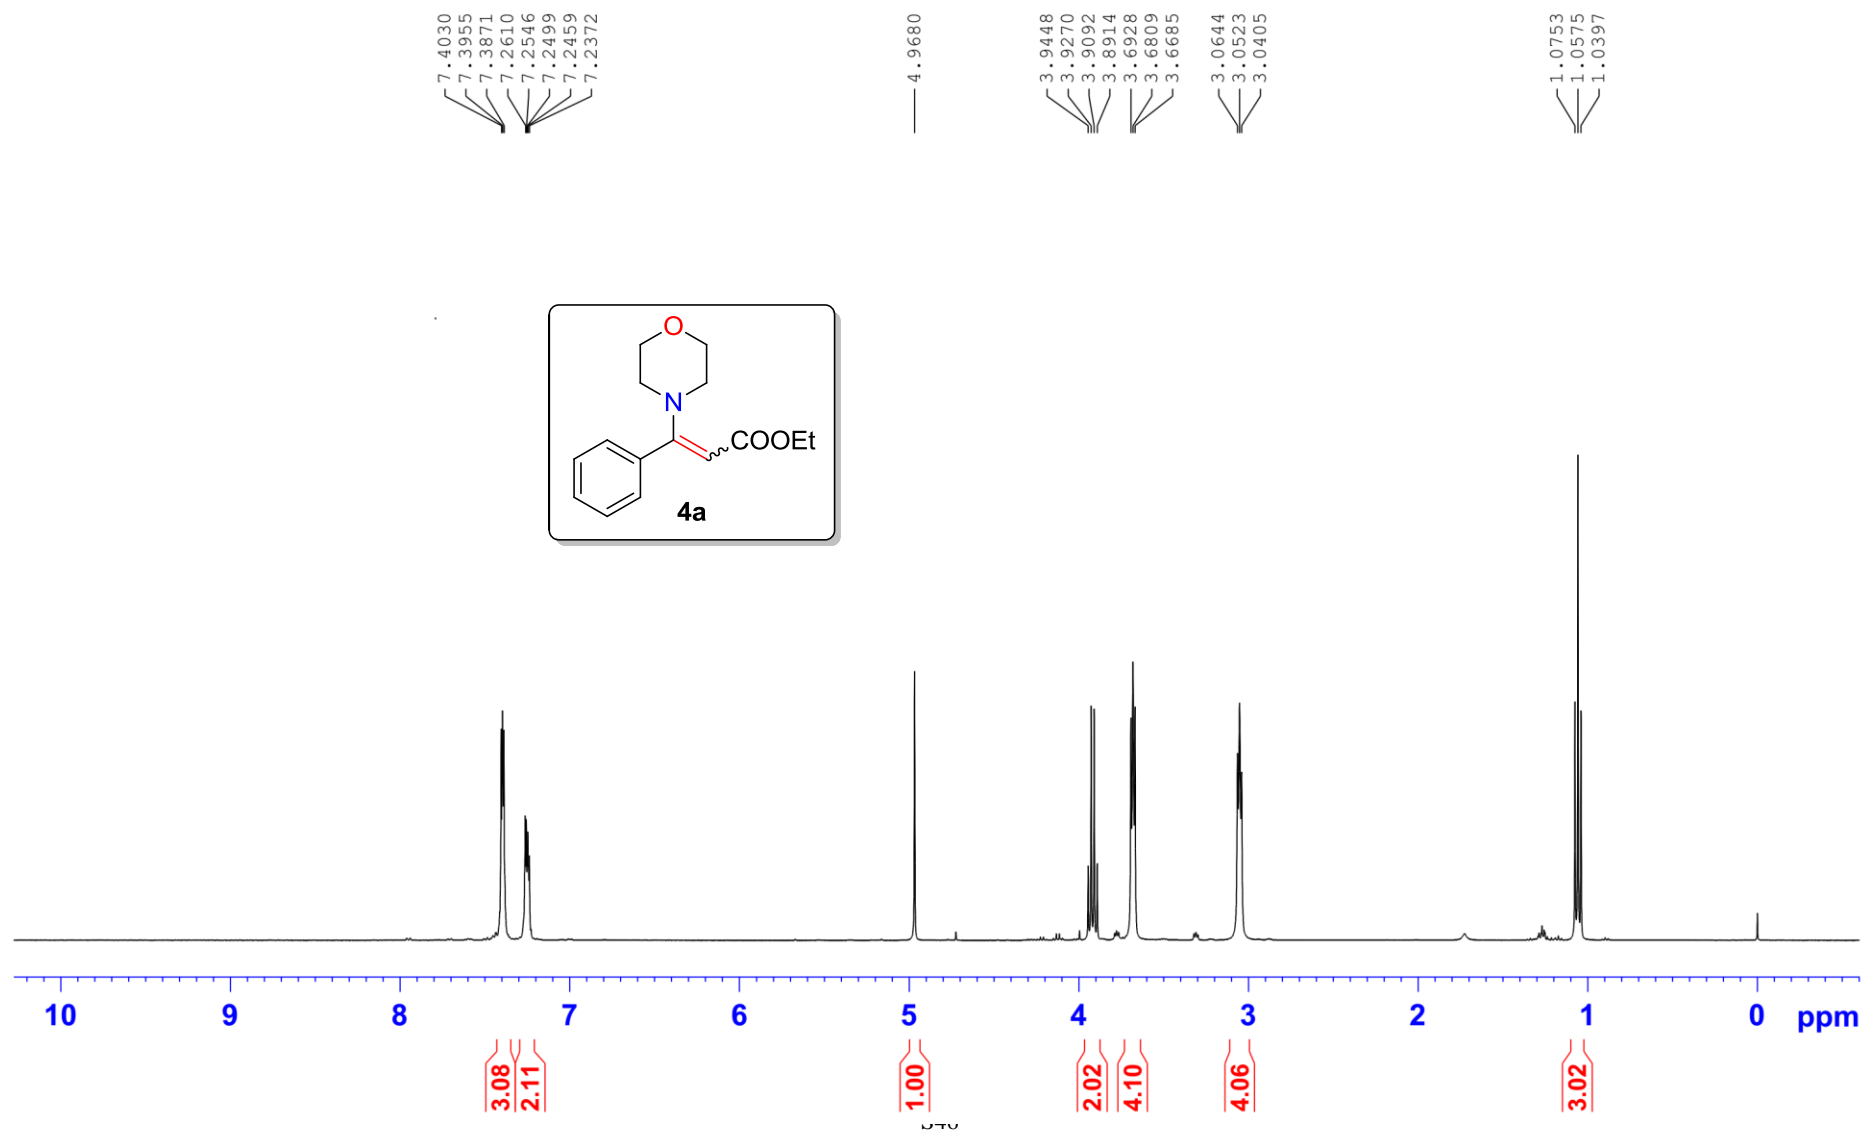

LJW-X16X15-3-CNMR

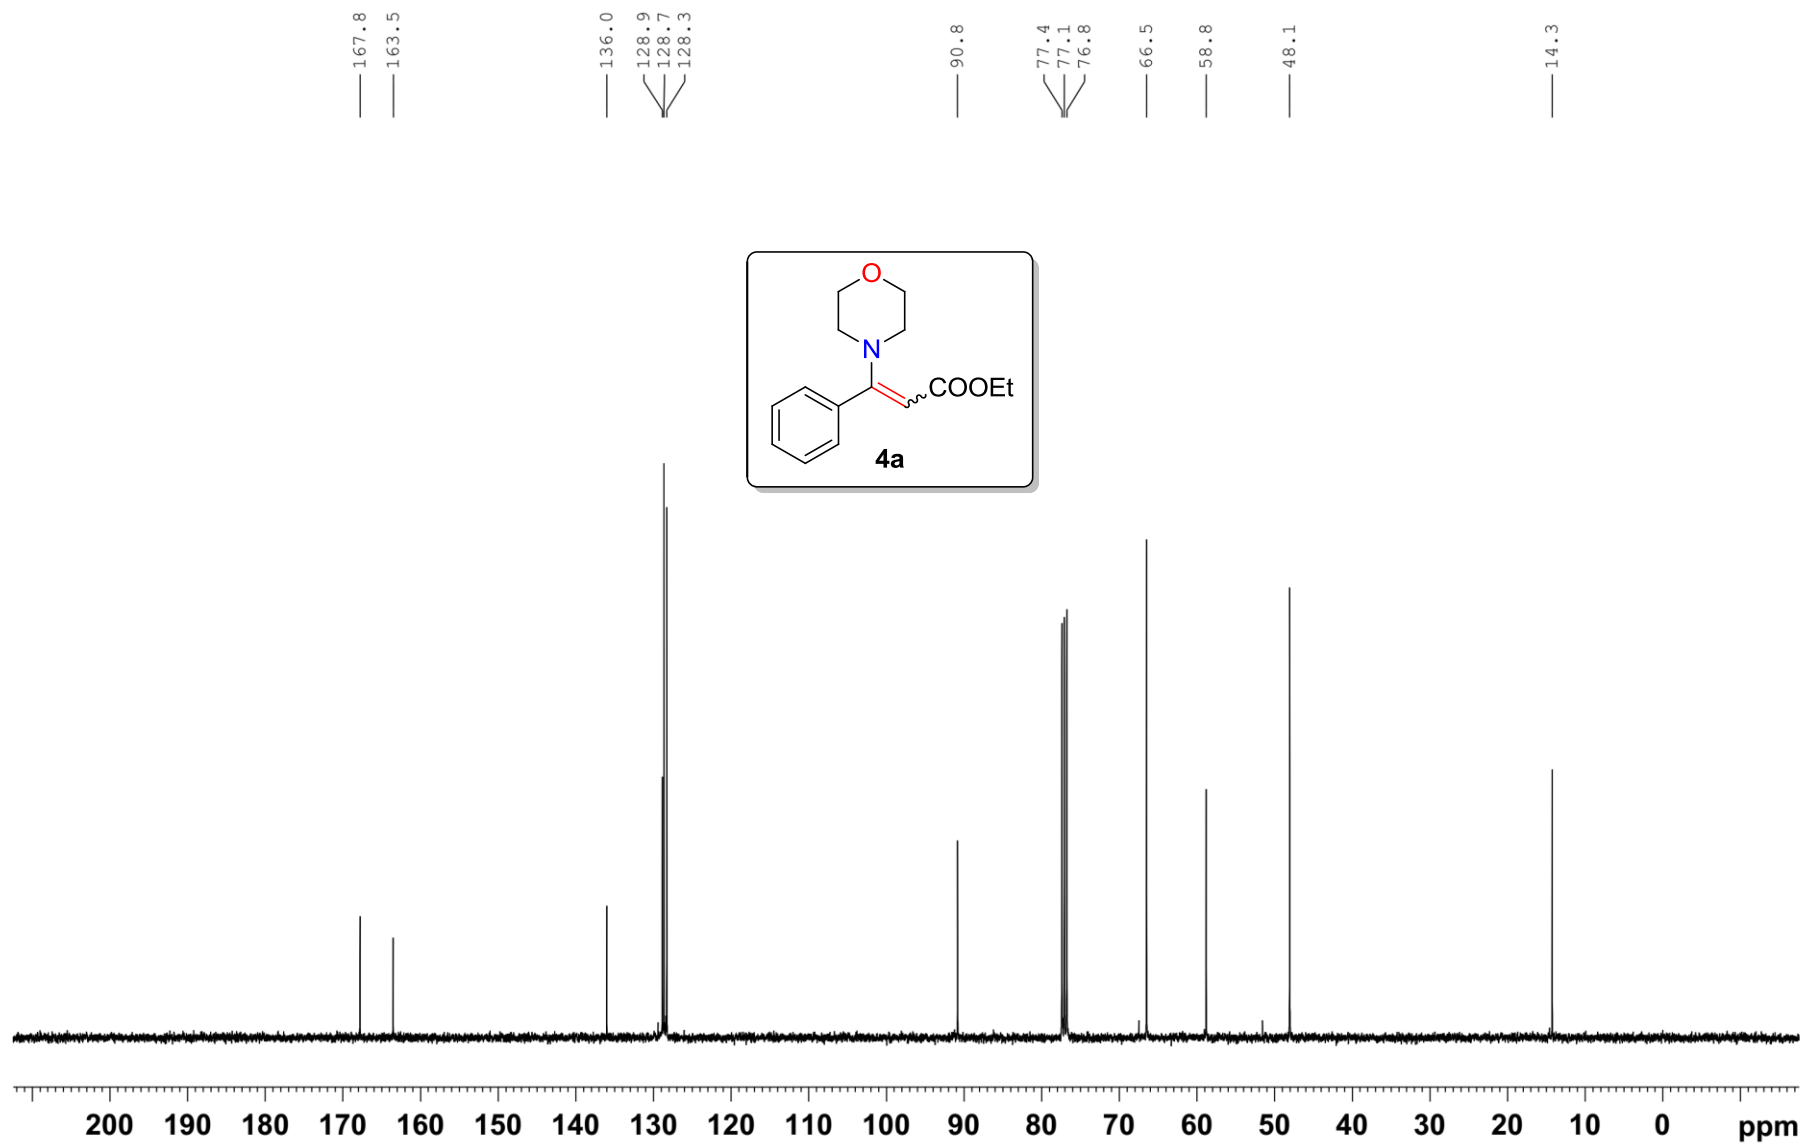

Supplement: c6ob02136k1.pdf [file c6ob02136k1.pdf]
